# Supplementary material for: Catalytic enantioselective bromohydroxylation of cinnamyl alcohols
Source: Royal Society of Chemistry journal article supplement (doi:10.1039/d1ra02297k), 2021-01-01

# Catalytic Enantioselective Bromohydroxylation of Cinnamyl Alcohols

Jing Li<sup>a</sup> and Yian Shi<sup>\*,a,b</sup>

*<sup>a</sup>Institute of Natural and Synthetic Organic Chemistry, Changzhou  
University, Changzhou 213164, P. R. China.*

*<sup>b</sup>Department of Chemistry, Colorado State University, Fort Collins,  
Colorado 80523, USA.*

## Supporting Information

### Table of Contents

|                                                                     |      |
|---------------------------------------------------------------------|------|
| Experimental procedures and characterization data                   | S-2  |
| X-Ray structures of compounds <b>2a</b> , <b>2e</b> , and <b>12</b> | S-17 |
| Data for determination of enantiomeric excesses                     | S-48 |
| NMR spectra                                                         | S-62 |

**General Methods.** All commercially available reagents were used without further purification unless otherwise noted. All dry solvents were purified with solvent purification system before use. Acetone AR and acetonitrile AR were used directly. Column chromatography was performed on silica gel (300-400 mesh). <sup>1</sup>H NMR spectra were recorded on a 400 MHz NMR spectrometer and <sup>13</sup>C NMR spectra were recorded on a 100 MHz NMR spectrometer. IR spectra were recorded on a FT-IR spectrometer. Melting points were uncorrected. Cinnamyl alcohol **1h** was purchased from commercial suppliers. Cinnamyl alcohols **1a**, **1c** and **1e** were prepared by reacting the corresponding cinnamyl aldehydes with NaBH<sub>4</sub>.<sup>1</sup> Cinnamyl alcohol **1b** was prepared by the reduction of (*E*)-methyl 3-(4-chlorophenyl)acrylate with DIBAL-H.<sup>1</sup> Cinnamyl alcohols **1d**, **1f-g**, **1i-1r** were prepared by the olefination of corresponding benzaldehydes/ketone with ethyl 2-(diethoxyphosphoryl)acetate and the subsequent reduction with DIBAL-H.<sup>1</sup> Olefin **1r** was prepared from the corresponding alcohol (**1a**) by the methylation with NaH and MeI.<sup>2</sup>

1 X. Huo, R. He, J. Fu, J. Zhang, G. Yang and W. Zhang, Stereoselective and site-specific allylic alkylation of amino acids and small peptides via a Pd/Cu dual catalysis, *J. Am. Chem. Soc.*, 2017, **139**, 9819.

2 C. Kelly, J. Ovian, R. Cywar, T. Gosselin, R. Wiles and N. Leadbeater, Oxidative cleavage of allyl ethers by an oxoammonium salt, *Org. Biomol. Chem.*, 2015, **13**, 4255.

**Representative procedure for asymmetric bromohydroxylation of cinnamyl alcohol (Table 2, entry 13).** A mixture of (DHQD)<sub>2</sub>PHAL (0.0389 g, 0.050 mmol), (-)-CSA (0.0116 g, 0.050 mmol), and *N*-bromobenzamide<sup>1</sup> (0.120 g, 0.60 mmol) in CH<sub>3</sub>CN (5.0 mL) and H<sub>2</sub>O (0.5 mL) was stirred at -30 °C for 15 min. Cinnamyl alcohol (**1m**) (0.1136 g, 0.50 mmol) was subsequently added. Upon stirring at -30 °C for 72 h, the reaction mixture was quenched with saturated aqueous Na<sub>2</sub>S<sub>2</sub>O<sub>3</sub> (10 mL) at -30 °C, extracted with EtOAc (3x10 mL), dried over Na<sub>2</sub>SO<sub>4</sub>, filtered, concentrated, and purified by flash chromatography (silica gel, eluent: petroleum ether:ethyl acetate = 2:1) to afford bromohydrin **2m** as colorless oil (0.1168 g, 72% yield, 95% ee).

1 S. Fujisaki, S. Hamura, H. Eguchi and A. Nishida, A facile synthesis of *N*-bromo imides

and amides using sodium bromate and hydrobromic acid (or sodium bromide) in the presence of sulfuric acid, *Bull. Chem. Soc. Jpn.*, 1993, **66**, 2426.

**Procedure for gram scale asymmetric bromohydroxylation (Scheme 4).** A mixture of (DHQD)<sub>2</sub>PHAL (0.3895 g, 0.50 mmol), (-)-CSA (0.1162 g, 0.50 mmol), and *N*-bromobenzamide (1.20 g, 6.0 mmol) in CH<sub>3</sub>CN (50.0 mL) and H<sub>2</sub>O (5.0 mL) was stirred at -30 °C for 15 min. Cinnamyl alcohol (**1m**) (1.1355 g, 5.0 mmol) was subsequently added. Upon stirring at -30 °C for 72 h, the reaction mixture was quenched with saturated aqueous Na<sub>2</sub>S<sub>2</sub>O<sub>3</sub> (50 mL) at -30 °C, extracted with EtOAc (3x50 mL), washed with saturated NaCl, dried over Na<sub>2</sub>SO<sub>4</sub>, filtered, concentrated, and purified by flash chromatography (silica gel, eluent: petroleum ether:ethyl acetate = 2:1) to afford bromohydrin **2m** as colorless oil (1.1341 g, 70% yield, 95% ee).

**Table 2, entry 1**

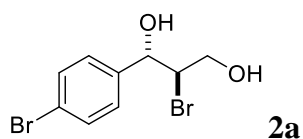

(X-ray structure)

White solid; mp. 68-69 °C;  $[\alpha]_D^{20} = +19.2$  (*c* 0.99, CHCl<sub>3</sub>) (83% ee); IR (film) 3383, 1577, 1010 cm<sup>-1</sup>; <sup>1</sup>H NMR (400 MHz, CDCl<sub>3</sub>) δ 7.55-7.48 (m, 2H), 7.32-7.27 (m, 2H), 5.02 (dd, *J* = 6.0, 4.4 Hz, 1H), 4.25 (dt, *J* = 6.0, 4.8 Hz, 1H), 4.02 (ddd, *J* = 12.4, 6.4, 4.8 Hz, 1H), 3.88 (ddd, *J* = 12.4, 6.8, 4.8 Hz, 1H), 3.00 (d, *J* = 4.4 Hz, 1H), 2.37 (dd, *J* = 6.8, 6.4 Hz, 1H); <sup>13</sup>C NMR (100 MHz, CDCl<sub>3</sub>) δ 139.4, 131.9, 128.5, 122.6, 76.3, 64.3, 59.4; HRMS Calcd for C<sub>9</sub>H<sub>14</sub>Br<sub>2</sub>NO<sub>2</sub> (M+NH<sub>4</sub>)<sup>+</sup>: 325.9386; Found: 325.9386.

**Table 2, entry 2**

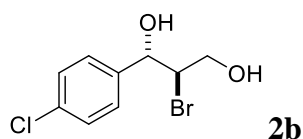

Light yellow oil;  $[\alpha]_D^{20} = +22.3$  (*c* 1.1, CHCl<sub>3</sub>) (80% ee); IR (film) 3362, 1491, 1014 cm<sup>-1</sup>; <sup>1</sup>H NMR (400 MHz, CDCl<sub>3</sub>)  $\delta$  7.39-7.32 (m, 4H), 5.04 (dd, *J* = 6.4, 4.0 Hz, 1H), 4.26 (dt, *J* = 6.4, 4.8 Hz, 1H), 4.02 (ddd, *J* = 12.4, 6.4, 4.8 Hz, 1H), 3.88 (ddd, *J* = 12.4, 6.8, 4.8 Hz, 1H), 2.98 (d, *J* = 4.0 Hz, 1H), 2.36 (dd, *J* = 6.8, 6.4 Hz, 1H); <sup>13</sup>C NMR (100 MHz, CDCl<sub>3</sub>)  $\delta$  139.0, 134.4, 128.9, 128.2, 76.2, 64.3, 59.2; HRMS Calcd for C<sub>9</sub>H<sub>14</sub>BrClNO<sub>2</sub> (M+NH<sub>4</sub>)<sup>+</sup>: 281.9891; Found: 281.9889.

**Table 2, entry 3**

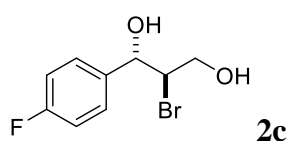

Yellow oil;  $[\alpha]_D^{20} = +20.6$  (*c* 0.89, CHCl<sub>3</sub>) (76% ee); IR (film) 3383, 1510, 1220 cm<sup>-1</sup>; <sup>1</sup>H NMR (400 MHz, CDCl<sub>3</sub>)  $\delta$  7.42-7.35 (m, 2H), 7.11-7.04 (m, 2H), 5.04 (dd, *J* = 6.4, 4.0 Hz, 1H), 4.26 (dt, *J* = 6.4, 4.8 Hz, 1H), 4.03 (ddd, *J* = 12.4, 6.4, 4.8 Hz, 1H), 3.89 (ddd, *J* = 12.4, 6.4, 4.8 Hz, 1H), 3.01 (d, *J* = 4.0 Hz, 1H), 2.44 (dd, *J* = 6.8, 6.4 Hz, 1H); <sup>13</sup>C NMR (100 MHz, CDCl<sub>3</sub>)  $\delta$  162.8 (d, *J* = 245.6 Hz), 136.3 (d, *J* = 3.2 Hz), 128.5 (d, *J* = 8.3 Hz), 115.7 (d, *J* = 21.5 Hz), 76.3, 64.4, 59.6; HRMS Calcd for C<sub>9</sub>H<sub>14</sub>BrFNO<sub>2</sub> (M+NH<sub>4</sub>)<sup>+</sup>: 266.0186; Found: 266.0186.

**Table 2, entry 4**

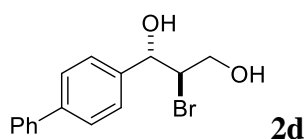

White solid; mp. 83-84 °C;  $[\alpha]_D^{20} = +19.2$  (*c* 1.1, CHCl<sub>3</sub>) (90% ee); IR (film) 3389, 1540, 1081 cm<sup>-1</sup>; <sup>1</sup>H NMR (400 MHz, CD<sub>3</sub>CN)  $\delta$  7.69-7.61 (m, 4H), 7.52-7.43 (m, 4H), 7.41-7.33 (m, 1H), 4.98 (dd, *J* = 6.4, 4.8 Hz, 1H), 4.35 (q, *J* = 5.6 Hz, 1H), 4.00 (d, *J* = 4.8 Hz, 1H), 3.91 (ddd, *J* = 12.4, 6.0, 4.8 Hz, 1H), 3.82 (ddd, *J* = 12.4, 6.4, 4.8 Hz, 1H), 3.30 (t, *J* = 6.0 Hz, 1H); <sup>13</sup>C NMR (100 MHz, CD<sub>3</sub>CN)  $\delta$  141.8, 141.4, 141.3, 129.9, 128.7, 128.5, 127.9, 127.6, 75.4, 64.4, 61.4; HRMS Calcd for C<sub>15</sub>H<sub>19</sub>BrNO<sub>2</sub> (M+NH<sub>4</sub>)<sup>+</sup>: 324.0594; Found: 324.0593.

**Table 2, entry 5**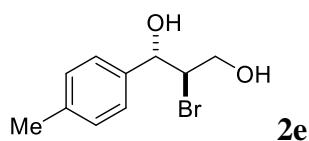

(X-ray structure)

White solid; mp. 57-58 °C;  $[\alpha]_D^{20} = +26.2$  (*c* 0.93, CHCl<sub>3</sub>) (82% ee); IR (film) 3374, 1578, 1063 cm<sup>-1</sup>; <sup>1</sup>H NMR (400 MHz, CDCl<sub>3</sub>) δ 7.29 (d, *J* = 8.0 Hz, 2H), 7.20 (d, *J* = 8.0 Hz, 2H), 5.03 (dd, *J* = 6.0, 4.0 Hz, 1H), 4.31 (dt, *J* = 6.4, 4.8 Hz, 1H), 4.02 (ddd, *J* = 12.4, 6.4, 4.8 Hz, 1H), 3.90 (ddd, *J* = 12.4, 6.4, 4.8 Hz, 1H), 2.77 (d, *J* = 4.0 Hz, 1H), 2.39 (t, *J* = 6.4 Hz, 1H), 2.36 (s, 3H); <sup>13</sup>C NMR (100 MHz, CDCl<sub>3</sub>) δ 138.6, 137.5, 129.5, 126.6, 77.0, 64.5, 60.1, 21.4; HRMS Calcd for C<sub>10</sub>H<sub>17</sub>BrNO<sub>2</sub> (M+NH<sub>4</sub>)<sup>+</sup>: 262.0437; Found: 262.0437.

**Table 2, entry 6**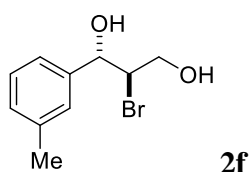

Colorless oil;  $[\alpha]_D^{20} = +13.7$  (*c* 1.0, CHCl<sub>3</sub>) (62% ee); IR (film) 3447, 1637, 1219 cm<sup>-1</sup>; <sup>1</sup>H NMR (400 MHz, CDCl<sub>3</sub>) δ 7.27 (t, *J* = 7.6 Hz, 1H), 7.21 (s, 1H), 7.19 (d, *J* = 7.6 Hz, 1H), 7.15 (d, *J* = 7.6 Hz, 1H), 5.03 (d, *J* = 5.6 Hz, 1H), 4.32 (dt, *J* = 5.6, 5.2 Hz, 1H), 4.02 (dd, *J* = 12.4, 4.8 Hz, 1H), 3.89 (dd, *J* = 12.4, 4.8 Hz, 1H), 2.92 (br s, 1H), 2.46 (br s, 1H), 2.37 (s, 3H); <sup>13</sup>C NMR (100 MHz, CDCl<sub>3</sub>) δ 140.4, 138.5, 129.4, 128.7, 127.3, 123.8, 77.0, 64.4, 59.7, 21.7; HRMS Calcd for C<sub>10</sub>H<sub>17</sub>BrNO<sub>2</sub> (M+NH<sub>4</sub>)<sup>+</sup>: 262.0437; Found: 262.0434.

**Table 2, entry 7**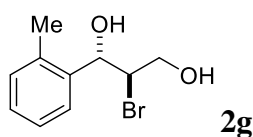

Light yellow oil;  $[\alpha]_{\text{D}}^{20} = +14.8$  ( $c$  1.1,  $\text{CHCl}_3$ ) (70% ee); IR (film) 3441, 1577, 1383  $\text{cm}^{-1}$ ;  $^1\text{H}$  NMR (400 MHz,  $\text{CDCl}_3$ )  $\delta$  7.52 (dd,  $J = 7.2, 1.6$  Hz, 1H), 7.30-7.21 (m, 2H), 7.18 (dd,  $J = 7.2, 1.6$  Hz, 1H), 5.32 (dd,  $J = 5.6, 4.0$  Hz, 1H), 4.32 (dt,  $J = 5.6, 4.8$  Hz, 1H), 4.08 (ddd,  $J = 12.4, 6.4, 4.8$  Hz, 1H), 3.94 (ddd,  $J = 12.4, 6.8, 4.4$  Hz, 1H), 2.81 (d,  $J = 4.0$  Hz, 1H), 2.44 (dd,  $J = 6.8, 6.4$  Hz, 1H), 2.38 (s, 3H);  $^{13}\text{C}$  NMR (100 MHz,  $\text{CDCl}_3$ )  $\delta$  138.8, 135.4, 130.9, 128.4, 126.7, 125.8, 73.8, 64.4, 58.6, 19.5; HRMS Calcd for  $\text{C}_{10}\text{H}_{17}\text{BrNO}_2$  ( $\text{M}+\text{NH}_4$ ) $^+$ : 262.0437; Found: 262.0434.

**Table 2, entry 8**

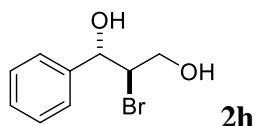

Colorless oil;  $[\alpha]_{\text{D}}^{20} = +13.0$  ( $c$  1.0,  $\text{CHCl}_3$ ) (55% ee); IR (film) 3439, 1635, 1122  $\text{cm}^{-1}$ ;  $^1\text{H}$  NMR (400 MHz,  $\text{CDCl}_3$ )  $\delta$  7.43-7.31 (m, 5H), 5.06 (dd,  $J = 6.0, 4.0$  Hz, 1H), 4.32 (dt,  $J = 6.0, 4.8$  Hz, 1H), 4.02 (ddd,  $J = 12.4, 6.4, 5.2$  Hz, 1H), 3.89 (ddd,  $J = 12.4, 6.8, 4.8$  Hz, 1H), 2.95 (d,  $J = 4.0$  Hz, 1H), 2.44 (dd,  $J = 6.8, 6.4$  Hz, 1H);  $^{13}\text{C}$  NMR (100 MHz,  $\text{CDCl}_3$ )  $\delta$  140.4, 128.8, 128.7, 126.7, 77.1, 64.4, 60.1; HRMS Calcd for  $\text{C}_9\text{H}_{15}\text{BrNO}_2$  ( $\text{M}+\text{NH}_4$ ) $^+$ : 248.0281; Found: 248.0280.

- 1 A. K. Macharla, R. C. Nappunni and N. Nama, Regio- and stereoselective hydroxybromination and dibromination of olefins using ammonium bromide and oxone, *Tetrahedron Lett.*, 2012, **53**, 1401.
- 2 A. J. Burckle, B. Gál, F. J. Seidl, V. H. Vasilev and N. Z. Burns, Enantiospecific solvolytic functionalization of bromochlorides, *J. Am. Chem. Soc.*, 2017, **139**, 13562.

**Table 2, entry 9**

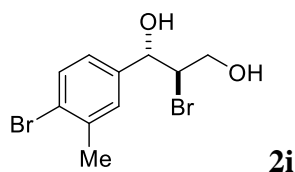

Colorless oil;  $[\alpha]_{\text{D}}^{20} = +11.9$  ( $c$  0.99,  $\text{CHCl}_3$ ) (80% ee); IR (film) 3417, 1480, 1049  $\text{cm}^{-1}$ ;  $^1\text{H}$  NMR (400 MHz,  $\text{CDCl}_3$ )  $\delta$  7.54 (d,  $J = 8.0$  Hz, 1H), 7.27 (d,  $J = 1.6$  Hz, 1H),

7.09 (dd,  $J = 8.0, 1.6$  Hz, 1H), 5.00 (dd,  $J = 5.6, 4.0$  Hz, 1H), 4.27 (dt,  $J = 5.6, 4.8$  Hz, 1H), 4.02 (dt,  $J = 12.4, 6.4$  Hz, 1H), 3.88 (ddd,  $J = 12.0, 6.4, 4.8$  Hz, 1H), 2.91 (d,  $J = 4.0$  Hz, 1H), 2.42 (s, 3H), 2.33 (t,  $J = 6.4$  Hz, 1H);  $^{13}\text{C}$  NMR (100 MHz,  $\text{CDCl}_3$ )  $\delta$  139.7, 138.4, 132.7, 129.1, 125.7, 125.0, 76.4, 64.3, 59.4, 23.2; HRMS Calcd for  $\text{C}_{10}\text{H}_{16}\text{Br}_2\text{NO}_2$  ( $\text{M}+\text{NH}_4$ ) $^+$ : 339.9542; Found: 339.9542.

**Table 2, entry 10**

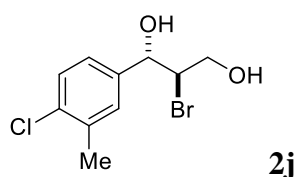

Colorless oil;  $[\alpha]_{\text{D}}^{20} = +19.4$  ( $c$  0.96,  $\text{CHCl}_3$ ) (80% ee); IR (film) 3454, 1580, 1124  $\text{cm}^{-1}$ ;  $^1\text{H}$  NMR (400 MHz,  $\text{CDCl}_3$ )  $\delta$  7.35 (d,  $J = 8.0$  Hz, 1H), 7.27 (d,  $J = 2.0$  Hz, 1H), 7.16 (dd,  $J = 8.0, 2.0$  Hz, 1H), 5.00 (dd,  $J = 6.0, 3.6$  Hz, 1H), 4.27 (dt,  $J = 6.0, 4.8$  Hz, 1H), 4.02 (dt,  $J = 12.4, 4.8$  Hz, 1H), 3.88 (dt,  $J = 12.4, 4.8$  Hz, 1H), 2.94 (d,  $J = 3.6$  Hz, 1H), 2.39 (s, 3H), 2.37 (br s, 1H);  $^{13}\text{C}$  NMR (100 MHz,  $\text{CDCl}_3$ )  $\delta$  139.3, 136.9, 134.8, 129.7, 129.5, 125.8, 76.7, 64.7, 59.6, 20.7; HRMS Calcd for  $\text{C}_{10}\text{H}_{16}\text{BrClNO}_2$  ( $\text{M}+\text{NH}_4$ ) $^+$ : 296.0047; Found: 296.0046.

**Table 2, entry 11**

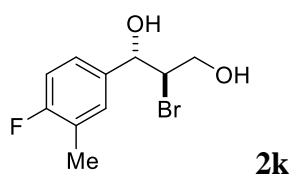

Colorless oil;  $[\alpha]_{\text{D}}^{20} = +21.9$  ( $c$  1.0,  $\text{CHCl}_3$ ) (80% ee); IR (film) 3444, 1636, 1120  $\text{cm}^{-1}$ ;  $^1\text{H}$  NMR (400 MHz,  $\text{CDCl}_3$ )  $\delta$  7.22 (dd,  $J = 7.2, 2.0$  Hz, 1H), 7.17 (ddd,  $J = 8.4, 4.8, 2.0$  Hz, 1H), 7.00 (dd,  $J = 9.2, 8.8$  Hz, 1H), 4.99 (dd,  $J = 6.0, 2.4$  Hz, 1H), 4.25 (dt,  $J = 6.4, 4.8$  Hz, 1H), 4.02 (dt,  $J = 12.4, 4.8$  Hz, 1H), 3.89 (dt,  $J = 12.4, 4.8$  Hz, 1H), 3.02 (d,  $J = 3.6$  Hz, 1H), 2.50 (t,  $J = 6.4$  Hz, 1H), 2.29 (d,  $J = 1.6$  Hz, 3H);  $^{13}\text{C}$  NMR (100 MHz,  $\text{CDCl}_3$ )  $\delta$  161.3 (d,  $J = 244.2$  Hz), 136.0 (d,  $J = 3.5$  Hz), 129.8 (d,  $J = 5.4$  Hz), 125.7 (d,  $J = 8.2$  Hz), 125.2 (d,  $J = 17.5$  Hz), 115.2 (d,  $J = 22.4$  Hz), 76.3, 64.4, 59.3, 14.8 (d,  $J = 3.5$

Hz); HRMS Calcd for C<sub>10</sub>H<sub>16</sub>BrFNO<sub>2</sub> (M+NH<sub>4</sub>)<sup>+</sup>: 280.0343; Found: 280.0342.

**Table 2, entry 12**

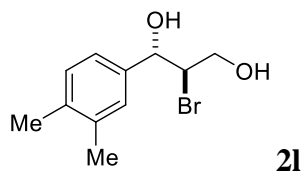

Colorless oil;  $[\alpha]_D^{20} = +18.4$  (*c* 0.96, CHCl<sub>3</sub>) (82% ee); IR (film) 3450, 1580, 1216 cm<sup>-1</sup>; <sup>1</sup>H NMR (400 MHz, CDCl<sub>3</sub>)  $\delta$  7.16 (s, 1H), 7.15 (d, *J* = 8.0 Hz, 1H), 7.12 (dd, *J* = 8.0, 1.6 Hz, 1H), 4.99 (d, *J* = 6.4 Hz, 1H), 4.31 (dt, *J* = 6.0, 4.8 Hz, 1H), 4.02 (dd, *J* = 12.4, 4.8 Hz, 1H), 3.91 (dd, *J* = 12.4, 4.8 Hz, 1H), 2.49 (br s, 2H), 2.28 (s, 3H), 2.26 (s, 3H); <sup>13</sup>C NMR (100 MHz, CDCl<sub>3</sub>)  $\delta$  138.0, 137.08, 137.06, 130.0, 127.8, 124.1, 77.0, 64.5, 59.7, 20.1, 19.7; HRMS Calcd for C<sub>11</sub>H<sub>19</sub>BrNO<sub>2</sub> (M+NH<sub>4</sub>)<sup>+</sup>: 276.0594; Found: 276.0590.

**Table 2, entry 13**

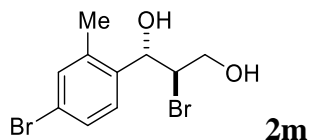

Colorless oil;  $[\alpha]_D^{20} = +21.7$  (*c* 1.2, CHCl<sub>3</sub>) (95% ee); IR (film) 3440, 1579, 1219 cm<sup>-1</sup>; <sup>1</sup>H NMR (400 MHz, CDCl<sub>3</sub>)  $\delta$  7.43-7.36 (m, 2H), 7.34 (s, 1H), 5.25 (dd, *J* = 6.0, 4.0 Hz, 1H), 4.25 (dt, *J* = 5.6, 4.8 Hz, 1H), 4.08 (ddd, *J* = 12.4, 6.8, 5.2 Hz, 1H), 3.93 (ddd, *J* = 12.4, 6.4, 4.8 Hz, 1H), 2.88 (d, *J* = 4.0 Hz, 1H), 2.38 (t, *J* = 6.4 Hz, 1H), 2.36 (s, 3H); <sup>13</sup>C NMR (100 MHz, CDCl<sub>3</sub>)  $\delta$  137.9, 137.7, 133.6, 129.7, 127.8, 122.3, 73.3, 64.4, 58.1, 19.3; HRMS Calcd for C<sub>10</sub>H<sub>16</sub>Br<sub>2</sub>NO<sub>2</sub> (M+NH<sub>4</sub>)<sup>+</sup>: 339.9542; Found: 339.9542.

**Table 2, entry 14**

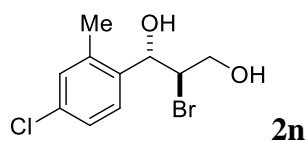

Colorless oil;  $[\alpha]_D^{20} = +25.8$  (*c* 1.1, CHCl<sub>3</sub>) (94% ee); IR (film) 3387, 1597, 1060 cm<sup>-1</sup>;



$^1\text{H}$  NMR (400 MHz,  $\text{CDCl}_3$ )  $\delta$  7.43 (d,  $J = 8.4$  Hz, 1H), 7.23 (dd,  $J = 8.4, 2.4$  Hz, 1H), 7.16 (d,  $J = 2.4$  Hz, 1H), 5.24 (d,  $J = 6.0$  Hz, 1H), 4.23 (dt,  $J = 6.0, 4.8$  Hz, 1H), 4.07 (dd,  $J = 12.4, 3.6$  Hz, 1H), 3.91 (dd,  $J = 12.4, 3.6$  Hz, 1H), 3.19 (br s, 1H), 2.63 (br s, 1H), 2.34 (s, 3H);  $^{13}\text{C}$  NMR (100 MHz,  $\text{CDCl}_3$ )  $\delta$  137.41, 137.37, 133.9, 130.6, 127.4, 126.7, 73.2, 64.4, 58.0, 19.4; HRMS Calcd for  $\text{C}_{10}\text{H}_{12}\text{BrClNaO}_2$  ( $\text{M}+\text{Na}$ ) $^+$ : 300.9601; Found: 300.9600.

**Table 2, entry 15**

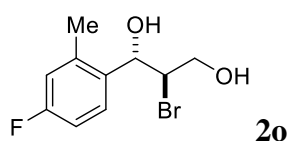

Colorless oil;  $[\alpha]_{\text{D}}^{20} = +28.7$  ( $c$  1.1,  $\text{CHCl}_3$ ) (91% ee); IR (film) 3387, 1590, 1059  $\text{cm}^{-1}$ ;  $^1\text{H}$  NMR (400 MHz,  $\text{CDCl}_3$ )  $\delta$  7.48 (dd,  $J = 8.4, 6.0$  Hz, 1H), 6.95 (td,  $J = 8.4, 2.4$  Hz, 1H), 6.88 (dd,  $J = 9.6, 2.4$  Hz, 1H), 5.27 (dd,  $J = 6.0, 4.0$  Hz, 1H), 4.27 (dt,  $J = 6.0, 4.8$  Hz, 1H), 4.09 (ddd,  $J = 12.0, 6.4, 4.8$  Hz, 1H), 3.94 (ddd,  $J = 12.0, 6.8, 4.8$  Hz, 1H), 2.84 (d,  $J = 4.0$  Hz, 1H), 2.42 (t,  $J = 6.8$  Hz, 1H), 2.38 (s, 3H);  $^{13}\text{C}$  NMR (100 MHz,  $\text{CDCl}_3$ )  $\delta$  162.4 (d,  $J = 245.3$  Hz), 138.0 (d,  $J = 7.8$  Hz), 134.7 (d,  $J = 3.4$  Hz), 127.8 (d,  $J = 8.5$  Hz), 117.4 (d,  $J = 21.0$  Hz), 113.5 (d,  $J = 21.1$  Hz), 73.3, 64.4, 58.5, 19.6 (d,  $J = 1.0$  Hz); HRMS Calcd for  $\text{C}_{10}\text{H}_{12}\text{BrFNaO}_2$  ( $\text{M}+\text{Na}$ ) $^+$ : 284.9897; Found: 284.9890.

**Table 2, entry 16**

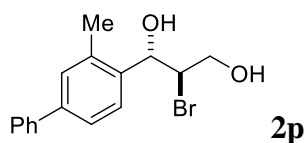

Colorless oil;  $[\alpha]_{\text{D}}^{20} = +15.2$  ( $c$  0.82,  $\text{CHCl}_3$ ) (94% ee); IR (film) 3395, 1485, 1059  $\text{cm}^{-1}$ ;  $^1\text{H}$  NMR (400 MHz,  $\text{CDCl}_3$ )  $\delta$  7.62-7.55 (m, 3H), 7.51-7.39 (m, 4H), 7.39-7.33 (m, 1H), 5.33 (dd,  $J = 6.0, 4.0$  Hz, 1H), 4.33 (dt,  $J = 6.0, 4.8$  Hz, 1H), 4.11 (dt,  $J = 12.4, 5.2$  Hz, 1H), 3.96 (dt,  $J = 12.4, 6.0$  Hz, 1H), 3.22 (d,  $J = 2.8$  Hz, 1H), 2.76 (t,  $J = 6.4$  Hz, 1H), 2.43 (s, 3H);  $^{13}\text{C}$  NMR (100 MHz,  $\text{CDCl}_3$ )  $\delta$  141.3, 140.7, 137.7, 135.8, 129.7, 129.0, 127.7, 127.3, 126.4, 125.4, 73.8, 64.4, 58.7, 19.7; HRMS Calcd for  $\text{C}_{16}\text{H}_{17}\text{BrNaO}_2$

(M+Na)<sup>+</sup>: 343.0304; Found: 343.0294.

**Table 2, entry 17**

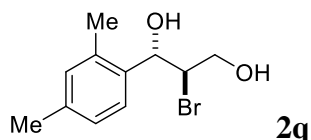

Colorless oil;  $[\alpha]_D^{20} = +24.3$  (*c* 1.0, CHCl<sub>3</sub>) (90% ee); IR (film) 3394, 1614, 1061 cm<sup>-1</sup>; <sup>1</sup>H NMR (400 MHz, CDCl<sub>3</sub>)  $\delta$  7.39 (d, *J* = 8.0 Hz, 1H), 7.08 (d, *J* = 8.0 Hz, 1H), 7.00 (s, 1H), 5.27 (dd, *J* = 6.0, 3.2 Hz, 1H), 4.30 (dt, *J* = 6.0, 4.8 Hz, 1H), 4.07 (dt, *J* = 12.4, 5.2 Hz, 1H), 3.95 (ddd, *J* = 12.4, 6.0, 4.8 Hz, 1H), 2.70 (d, *J* = 4.0 Hz, 1H), 2.46 (t, *J* = 6.4 Hz, 1H), 2.34 (s, 3H), 2.32 (s, 3H); <sup>13</sup>C NMR (100 MHz, CDCl<sub>3</sub>)  $\delta$  138.0, 135.6, 135.1, 131.5, 127.2, 125.5, 73.6, 64.3, 58.6, 21.1, 19.2; HRMS Calcd for C<sub>11</sub>H<sub>15</sub>BrNaO<sub>2</sub> (M+Na)<sup>+</sup>: 281.0148; Found: 281.0144.

**Table 2, entry 18**

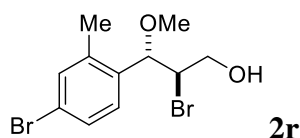

Colorless oil;  $[\alpha]_D^{20} = +48.0$  (*c* 0.99, CHCl<sub>3</sub>) (90% ee); IR (film) 3438, 1590, 1088 cm<sup>-1</sup>; <sup>1</sup>H NMR (400 MHz, CDCl<sub>3</sub>)  $\delta$  7.38 (dd, *J* = 8.4, 2.0 Hz, 1H), 7.34 (d, *J* = 1.6 Hz, 1H), 7.24 (d, *J* = 8.4 Hz, 1H), 4.73 (d, *J* = 7.2 Hz, 1H), 4.15 (dt, *J* = 7.6, 4.8 Hz, 1H), 4.04 (ddd, *J* = 12.4, 7.2, 4.8 Hz, 1H), 3.94 (ddd, *J* = 12.4, 6.4, 4.8 Hz, 1H), 3.22 (s, 3H), 2.64 (dd, *J* = 7.2, 6.4 Hz, 1H), 2.37 (s, 3H); <sup>13</sup>C NMR (100 MHz, CDCl<sub>3</sub>)  $\delta$  139.1, 136.0, 133.6, 129.8, 128.4, 122.3, 82.2, 64.8, 57.6, 57.3, 19.5; HRMS Calcd for C<sub>11</sub>H<sub>18</sub>Br<sub>2</sub>NO<sub>2</sub> (M+NH<sub>4</sub>)<sup>+</sup>: 353.9699; Found: 353.9696.

**Table 2, entry 19**

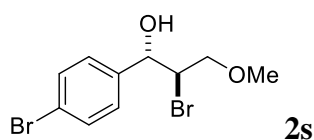

Yellow oil;  $[\alpha]_D^{20} = +14.1$  (*c* 0.98, CHCl<sub>3</sub>) (80% ee); IR (film) 3447, 1577, 1219 cm<sup>-1</sup>;

$^1\text{H}$  NMR (400 MHz,  $\text{CDCl}_3$ )  $\delta$  7.50 (d,  $J = 8.4$  Hz, 2H), 7.27 (d,  $J = 9.2$  Hz, 2H), 4.97 (d,  $J = 6.0$  Hz, 1H), 4.26 (dt,  $J = 6.0, 5.2$  Hz, 1H), 3.79 (dd,  $J = 10.4, 5.2$  Hz, 1H), 3.63 (dd,  $J = 10.4, 6.0$  Hz, 1H), 3.46 (br s, 1H), 3.41 (s, 3H);  $^{13}\text{C}$  NMR (100 MHz,  $\text{CDCl}_3$ )  $\delta$  139.5, 131.7, 128.7, 122.4, 76.2, 74.4, 59.4, 54.9; HRMS Calcd for  $\text{C}_{10}\text{H}_{16}\text{Br}_2\text{NO}_2$  ( $\text{M}+\text{NH}_4$ ) $^+$ : 339.9542; Found: 339.9543.

### Determination of the absolute configuration of bromohydrin **2a** (Scheme 3)

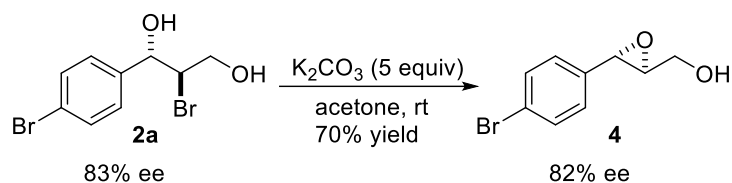

To a solution of bromohydrin **2a** (0.1081 g, 0.35 mmol) in acetone (4 mL) was added  $\text{K}_2\text{CO}_3$  (0.2420 g, 1.75 mmol). Upon stirring at rt overnight, the reaction mixture was filtered through a silica gel plug (washed with  $\text{CH}_2\text{Cl}_2$ ) and concentrated to give epoxide **4** as white solid (0.0563 g, 70%). mp. 57-58 °C.  $[\alpha]_{\text{D}}^{20} = -24.6$  ( $c$  0.80,  $\text{CHCl}_3$ ) (82% ee) {lit.<sup>1</sup>  $[\alpha]_{\text{D}}^{20} = -35.2$  ( $c$  2.0,  $\text{CHCl}_3$ )}; IR (film) 3447, 1636, 1093  $\text{cm}^{-1}$ ;  $^1\text{H}$  NMR (400 MHz,  $\text{CDCl}_3$ )  $\delta$  7.48 (d,  $J = 8.4$  Hz, 2H), 7.16 (d,  $J = 8.4$  Hz, 2H), 4.04 (ddd,  $J = 12.8, 5.2, 2.4$  Hz, 1H), 3.90 (d,  $J = 2.0$  Hz, 1H), 3.81 (ddd,  $J = 12.8, 8.0, 3.6$  Hz, 1H), 3.17 (dt,  $J = 3.6, 2.0$  Hz, 1H), 1.82 (dd,  $J = 8.0, 5.2$  Hz, 1H);  $^{13}\text{C}$  NMR (100 MHz,  $\text{CDCl}_3$ )  $\delta$  136.0, 131.9, 127.6, 122.4, 62.7, 61.2, 55.1. HRMS Calcd for  $\text{C}_9\text{H}_9\text{BrNaO}_2$  ( $\text{M}+\text{Na}$ ) $^+$ : 250.9678; Found: 250.9675.

1 Y. Gao, R. M. Hanson, J. M. Klunder, S. Y. Ko, H. Masamune and K. B. Sharpless, Catalytic asymmetric epoxidation and kinetic resolution modified procedures including in situ derivatization, *J. Am. Chem. Soc.*, 1987, **109**, 5765.

### Synthetic transformations of bromohydrin **2m** (Scheme 5)

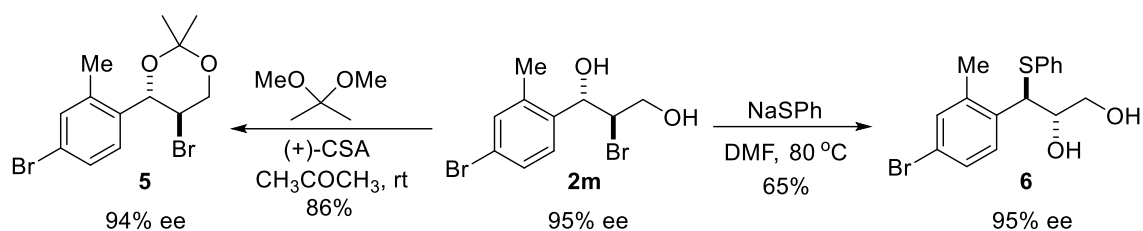

**Procedure for acetal 5.** A mixture of bromohydrin **2m** (0.1168 g, 0.36 mmol), 2,2-dimethoxypropane (0.9 mL), and (+)-CSA (0.0167 g, 0.072 mmol) in acetone (0.9 mL) was stirred at rt for 2 h, concentrated, and purified by flash chromatography (silica gel, eluent: petroleum ether:ethyl acetate = 18:1) to give acetal **5** as colorless oil (0.1132 g, 86%).  $[\alpha]_D^{20} = -9.5$  (*c* 1.2, CHCl<sub>3</sub>) (94% ee); IR (film) 3439, 1593, 1089 cm<sup>-1</sup>; <sup>1</sup>H NMR (400 MHz, CDCl<sub>3</sub>)  $\delta$  7.40 (dd, *J* = 8.0, 2.0 Hz, 1H), 7.35 (d, *J* = 1.6 Hz, 1H), 7.32 (d, *J* = 8.0 Hz, 1H), 5.16-5.07 (m, 1H), 4.20-4.10 (m, 3H), 2.44 (s, 3H), 1.65 (s, 3H), 1.46 (s, 3H); <sup>13</sup>C NMR (100 MHz, CDCl<sub>3</sub>)  $\delta$  139.1, 135.6, 133.5, 129.7, 128.9, 122.6, 100.2, 72.8, 65.9, 47.1, 29.5, 19.6, 18.8; HRMS Calcd for C<sub>13</sub>H<sub>20</sub>Br<sub>2</sub>NO<sub>2</sub> (M+NH<sub>4</sub>)<sup>+</sup>: 379.9855; Found: 379.9854.

S. Kiyooka, K. A. Shahid, Efficient enantio- and diastereoselective synthesis of enantiopure syn- $\alpha$ -bromo- $\beta$ -hydroxy- $\alpha$ -methylpropionate esters and their cis- $\alpha,\beta$ -epoxy derivatives based on a chiral oxazaborolidinone-promoted asymmetric aldol reaction, *Tetrahedron: Asymmetry*, 2000, **11**, 1537.

**Procedure for sulfide 6.** A mixture of bromohydrin **2m** (0.0850 g, 0.26 mmol) and NaSPh (0.0687 g, 0.52 mmol) in DMF (3 mL) was stirred at 80 °C for 1 h, quenched with water (6 mL), extracted with ethyl acetate (2x8 mL), washed with water and brine, dried over Na<sub>2</sub>SO<sub>4</sub>, filtered, concentrated, and purified by flash chromatography (silica gel, eluent: petroleum ether:ethyl acetate = 2:1) to give sulfide **6** as colorless oil (0.0597 g, 65%).  $[\alpha]_D^{20} = -93.6$  (*c* 0.87, CHCl<sub>3</sub>) (95% ee); IR (film) 3409, 1479, 1088 cm<sup>-1</sup>; <sup>1</sup>H NMR (400 MHz, CDCl<sub>3</sub>)  $\delta$  7.34-7.19 (m, 8H), 4.48 (d, *J* = 8.0 Hz, 1H), 4.08-4.01 (m, 1H), 3.86 (ddd, *J* = 11.2, 6.4, 3.6 Hz, 1H), 3.75 (dt, *J* = 11.2, 5.6 Hz, 1H), 2.39 (d, *J* = 4.0 Hz, 1H), 2.24 (s, 3H), 2.03 (t, *J* = 6.0 Hz, 1H); <sup>13</sup>C NMR (100 MHz, CDCl<sub>3</sub>)  $\delta$  139.2, 136.1,

133.5, 133.41, 133.36, 129.9, 129.7, 129.3, 128.3, 121.4, 73.7, 64.3, 51.2, 19.7; HRMS Calcd for C<sub>16</sub>H<sub>17</sub>BrNaO<sub>2</sub>S (M+Na)<sup>+</sup>: 375.0025; Found: 375.0026.

D. Huang, X. Liu, L. Li, Y. Cai, W. Liu and Y. Shi, Enantioselective bromoaminocyclization of allyl *N*-tosylcarbamates catalyzed by a chiral phosphine-Sc(OTf)<sub>3</sub> complex, *J. Am. Chem. Soc.*, 2013, **135**, 8101.

### Synthetic transformations of bromoether **2r** (Scheme 6)

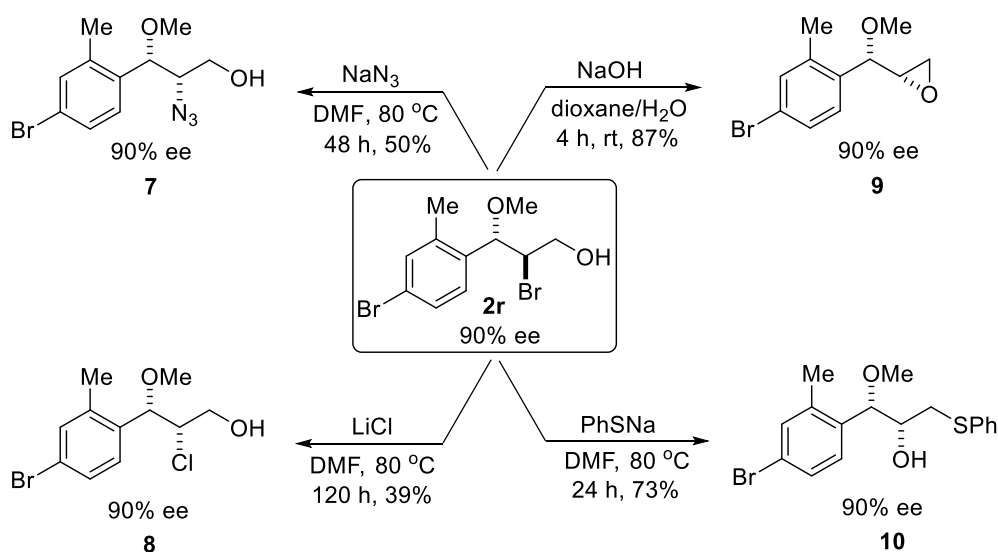

**Procedure for azide 7.** A mixture of bromoether **2r** (0.0843 g, 0.25 mmol) and NaN<sub>3</sub> (0.0650 g, 1.0 mmol) in DMF (2 mL) was stirred at 80 °C for 48 h, quenched with water (10 mL), extracted with ethyl acetate (3x10 mL), washed with water and brine, dried over Na<sub>2</sub>SO<sub>4</sub>, filtered, concentrated, and purified by flash chromatography (silica gel, eluent: petroleum ether:ethyl acetate = 8:1) to give azide **7** as colorless oil (0.0378 g, 50%). [α]<sub>D</sub><sup>20</sup> = +97.2 (*c* 1.3, CHCl<sub>3</sub>) (90% ee); IR (film) 3438, 2104, 1590, 1098 cm<sup>-1</sup>; <sup>1</sup>H NMR (400 MHz, CDCl<sub>3</sub>) δ 7.38 (dd, *J* = 8.4, 1.6 Hz, 1H), 7.34 (d, *J* = 1.6 Hz, 1H), 7.26 (d, *J* = 8.4 Hz, 1H), 4.59 (d, *J* = 7.2 Hz, 1H), 3.64 (ddd, *J* = 7.2, 5.6, 4.0 Hz, 1H), 3.52 (ddd, *J* = 11.6, 6.0, 3.6 Hz, 1H), 3.34 (dt, *J* = 11.6, 6.0 Hz, 1H), 3.23 (s, 3H), 2.35 (s, 3H), 1.90 (t, *J* = 6.0 Hz, 1H), <sup>13</sup>C NMR (100 MHz, CDCl<sub>3</sub>) δ 138.9, 135.3, 133.7, 129.9, 129.0, 122.3, 80.6, 67.8, 62.1, 56.9, 19.3; HRMS Calcd for C<sub>11</sub>H<sub>15</sub>BrN<sub>3</sub>O<sub>2</sub> (M+H)<sup>+</sup>: 300.0342; Found: 300.0343.

D. Huang, X. Liu, L. Li, Y. Cai, W. Liu and Y. Shi, Enantioselective

bromoaminocyclization of allyl *N*-tosylcarbamates catalyzed by a chiral phosphine-Sc(OTf)<sub>3</sub> complex, *J. Am. Chem. Soc.*, 2013, **135**, 8101.

**Procedure for chloride 8.** A mixture of bromoether **2r** (0.1101 g, 0.325 mmol) and LiCl (0.0551 g, 1.3 mmol) in DMF (3 mL) was stirred at 80 °C for 120 h, quenched with water (10 mL), extracted with ethyl acetate (3x10 mL), washed with water and brine, dried over Na<sub>2</sub>SO<sub>4</sub>, filtered, concentrated, and purified by flash chromatography (silica gel, eluent: petroleum ether:ethyl acetate = 8:1) to give chloride **8** as colorless oil (0.0375 g, 39%).  $[\alpha]_D^{20} = +43.8$  (*c* 0.86, CHCl<sub>3</sub>) (90% ee); IR (film) 3439, 1591, 1099 cm<sup>-1</sup>; <sup>1</sup>H NMR (400 MHz, CDCl<sub>3</sub>) δ 7.38 (dd, *J* = 8.4, 2.0 Hz, 1H), 7.34 (d, *J* = 2.0 Hz, 1H), 7.26 (d, *J* = 8.4 Hz, 1H), 4.68 (d, *J* = 6.4 Hz, 1H), 4.11 (dt, *J* = 6.0, 5.2 Hz, 1H), 3.77 (ddd, *J* = 11.6, 6.0, 4.8 Hz, 1H), 3.61 (dt, *J* = 11.6, 6.0 Hz, 1H), 3.25 (s, 3H), 2.36 (s, 3H), 2.15 (t, *J* = 6.4 Hz, 1H), <sup>13</sup>C NMR (100 MHz, CDCl<sub>3</sub>) δ 138.8, 135.1, 133.7, 129.7, 129.3, 122.4, 79.8, 66.2, 64.2, 57.3 19.2; HRMS Calcd for C<sub>11</sub>H<sub>15</sub>BrClO<sub>2</sub> (M+H)<sup>+</sup>: 292.9938; Found: 292.9937.

D. Huang, X. Liu, L. Li, Y. Cai, W. Liu and Y. Shi, Enantioselective bromoaminocyclization of allyl *N*-tosylcarbamates catalyzed by a chiral phosphine-Sc(OTf)<sub>3</sub> complex, *J. Am. Chem. Soc.*, 2013, **135**, 8101.

**Procedure for epoxide 9.** A mixture of bromoether **2r** (0.3101 g, 0.92 mmol) and NaOH (0.1840 g, 4.6 mmol) in dioxane (4 mL) and water (2 mL) was stirred at rt for 4 h. The reaction mixture was diluted with water (10 mL), extracted with ether (3x10 mL), washed with water and brine, dried over Na<sub>2</sub>SO<sub>4</sub>, filtered, concentrated, and purified by flash chromatography (silica gel, eluent: petroleum ether:ethyl acetate = 14:1) to give epoxide **9** as colorless oil (0.2047 g, 87%).  $[\alpha]_D^{20} = +30.3$  (*c* 1.3, CHCl<sub>3</sub>) (90% ee); IR (film) 3443, 1590, 1082 cm<sup>-1</sup>; <sup>1</sup>H NMR (400 MHz, CDCl<sub>3</sub>) δ 7.35 (dd, *J* = 8.4, 2.0 Hz, 1H), 7.32 (d, *J* = 1.6 Hz, 1H), 7.25 (d, *J* = 8.0 Hz, 1H), 4.19 (d, *J* = 6.0 Hz, 1H), 3.30 (s, 3H), 3.21 (ddd, *J* = 6.0, 4.4, 2.8 Hz, 1H), 2.71 (dd, *J* = 4.8, 4.4 Hz, 1H), 2.54 (dd, *J* = 4.8, 2.8 Hz, 1H), 2.31 (s, 3H); <sup>13</sup>C NMR (100 MHz, CDCl<sub>3</sub>) δ 138.5, 135.1, 133.6, 129.6, 129.1, 122.1, 81.0, 57.2, 54.4, 44.2, 19.4; HRMS Calcd for C<sub>11</sub>H<sub>14</sub>BrO<sub>2</sub> (M+H)<sup>+</sup>:

257.0172; Found: 257.0171.

D. X. Hu, G. M. Shibuya and N. Z. Burns, Catalytic enantioselective dibromination of allylic alcohols, *J. Am. Chem. Soc.*, 2013, **135**, 12960.

**Procedure for sulfide 10.** A mixture of bromoether **2r** (0.1041 g, 0.31 mmol) and NaSPh (0.0819 g, 0.62 mmol) in DMF (3 mL) was stirred at 80 °C for 24 h, quenched with water (10 mL), extracted with ethyl acetate (3x10 mL), washed with water and brine, dried over Na<sub>2</sub>SO<sub>4</sub>, filtered, concentrated, and purified by flash chromatography (silica gel, eluent: petroleum ether:ethyl acetate = 8:1) to give sulfide **10** as colorless oil (0.0828 g, 73%).  $[\alpha]_D^{20} = +45.9$  (*c* 0.99, CHCl<sub>3</sub>) (90% ee); IR (film) 3439, 1589, 1100 cm<sup>-1</sup>; <sup>1</sup>H NMR (400 MHz, CDCl<sub>3</sub>)  $\delta$  7.34 (dd, *J* = 8.0, 2.0 Hz, 1H), 7.32 (d, *J* = 1.6 Hz, 1H), 7.26-7.21 (m, 4H), 7.20-7.13 (m, 2H), 4.51 (d, *J* = 5.6 Hz, 1H), 3.84-3.76 (m, 1H), 3.19 (s, 3H), 3.05 (dd, *J* = 13.6, 5.2 Hz, 1H), 2.94 (dd, *J* = 13.6, 6.8 Hz, 1H), 2.81 (d, *J* = 4.4 Hz, 1H), 2.28 (s, 3H); <sup>13</sup>C NMR (100 MHz, CDCl<sub>3</sub>)  $\delta$  138.7, 135.8, 135.4, 133.6, 129.5, 129.3, 129.2, 129.0, 126.4, 121.9, 80.7, 73.3, 57.0, 36.6, 19.3; HRMS Calcd for C<sub>17</sub>H<sub>23</sub>BrNO<sub>2</sub>S (M+NH<sub>4</sub>)<sup>+</sup>: 384.0627; Found: 384.0626.

D. Huang, X. Liu, L. Li, Y. Cai, W. Liu and Y. Shi, Enantioselective bromoaminocyclization of allyl *N*-tosylcarbamates catalyzed by a chiral phosphine-Sc(OTf)<sub>3</sub> complex, *J. Am. Chem. Soc.*, 2013, **135**, 8101.

### Synthetic transformations of epoxide **9** (Scheme 7)

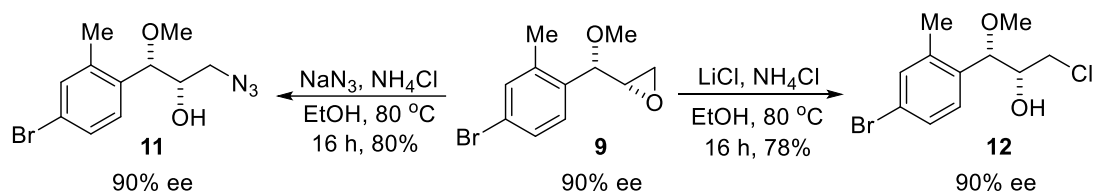

**Procedure for azide 11.** A mixture of epoxide **9** (0.0514 g, 0.20 mmol), NaN<sub>3</sub> (0.0520 g, 0.80 mmol), and NH<sub>4</sub>Cl (0.0134 g, 0.25 mmol) in EtOH (2 mL) was stirred at 80 °C for 16 h. The reaction mixture was concentrated, diluted with water (5 mL), extracted with ether (4x5 mL), washed with brine, dried over Na<sub>2</sub>SO<sub>4</sub>, filtered, concentrated, and purified by flash chromatography (silica gel, eluent: petroleum ether:ethyl acetate = 8:1) to give

azide **11** as colorless oil (0.0478 g, 80%).  $[\alpha]_{\text{D}}^{20} = +8.3$  ( $c$  1.1,  $\text{CHCl}_3$ ) (90% ee); IR (film) 3438, 2101, 1590, 1088  $\text{cm}^{-1}$ ;  $^1\text{H}$  NMR (400 MHz,  $\text{CDCl}_3$ )  $\delta$  7.38-7.32 (m, 2H), 7.17 (d,  $J = 8.0$  Hz, 1H), 4.44 (d,  $J = 7.6$  Hz, 1H), 3.90-3.82 (m, 1H), 3.32 (dd,  $J = 13.2$ , 4.0 Hz, 1H), 3.22 (s, 3H), 3.04 (d,  $J = 2.4$  Hz, 1H), 2.98 (dd,  $J = 13.2$ , 5.2 Hz, 1H), 2.36 (s, 3H);  $^{13}\text{C}$  NMR (100 MHz,  $\text{CDCl}_3$ )  $\delta$  139.2, 134.8, 133.8, 129.8, 129.1, 122.3, 80.4, 74.6, 56.9, 52.1, 19.3; HRMS Calcd for  $\text{C}_{11}\text{H}_{15}\text{BrN}_3\text{O}_2$  ( $\text{M}+\text{H}$ ) $^+$ : 300.0342; Found: 300.0341.

J. H. Lee, S. Gupta, W. Jeong, Y. H. Rhee and J. Park, Characterization and utility of *N*-substituted imines synthesized from alkyl azides by Ruthenium catalysis, *Angew. Chem., Int. Ed.*, 2012, **51**, 10851.

**Procedure for chloride 12.** A mixture of epoxide **9** (0.0514 g, 0.20 mmol), LiCl (0.0339 g, 0.80 mmol), and  $\text{NH}_4\text{Cl}$  (0.0134 g, 0.25 mmol) in EtOH (2 mL) was stirred at 80 °C for 16 h. The reaction mixture was concentrated, diluted with water (5 mL), extracted with ether (4x5 mL), washed with brine, dried over  $\text{Na}_2\text{SO}_4$ , filtered, concentrated, and purified by flash chromatography (silica gel, eluent: petroleum ether:ethyl acetate = 8:1) to give chloride **12** as white solid (0.0456 g, 78%). mp. 61-62 °C.  $[\alpha]_{\text{D}}^{20} = +34.7$  ( $c$  0.87,  $\text{CHCl}_3$ ) (90% ee); IR (film) 3443, 1590, 1088  $\text{cm}^{-1}$ ;  $^1\text{H}$  NMR (400 MHz,  $\text{CDCl}_3$ )  $\delta$  7.39-7.33 (m, 2H), 7.21 (d,  $J = 8.0$  Hz, 1H), 4.56 (d,  $J = 5.6$  Hz, 1H), 3.94-3.87 (m, 1H), 3.60 (dd,  $J = 11.2$ , 5.2 Hz, 1H), 3.36 (dd,  $J = 11.2$ , 5.2 Hz, 1H), 3.25 (s, 3H), 2.95 (d,  $J = 4.4$  Hz, 1H), 2.37 (s, 3H);  $^{13}\text{C}$  NMR (100 MHz,  $\text{CDCl}_3$ )  $\delta$  139.0, 134.8, 133.8, 129.7, 129.1, 122.2, 79.6, 74.3, 57.1, 45.1, 19.3; HRMS Calcd for  $\text{C}_{11}\text{H}_{18}\text{BrClNO}_2$  ( $\text{M}+\text{NH}_4$ ) $^+$ : 310.0204; Found: 310.0199.



The X-ray structure of compound **2a**

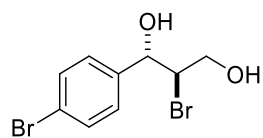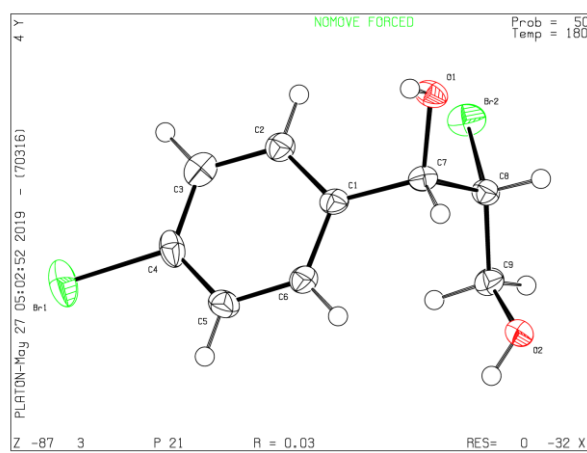

Table 1. Crystal data and structure refinement for **2a**.

|                                   |                                                               |                  |
|-----------------------------------|---------------------------------------------------------------|------------------|
| Identification code               | <b>2a</b>                                                     |                  |
| Empirical formula                 | C <sub>9</sub> H <sub>10</sub> Br <sub>2</sub> O <sub>2</sub> |                  |
| Formula weight                    | 309.99                                                        |                  |
| Temperature                       | 179.99(10) K                                                  |                  |
| Wavelength                        | 0.71073 Å                                                     |                  |
| Crystal system                    | Monoclinic                                                    |                  |
| Space group                       | P2 <sub>1</sub>                                               |                  |
| Unit cell dimensions              | a = 5.9149(2) Å                                               | α = 90°.         |
|                                   | b = 8.0004(2) Å                                               | β = 101.679(3)°. |
|                                   | c = 11.2008(3) Å                                              | γ = 90°.         |
| Volume                            | 519.07(3) Å <sup>3</sup>                                      |                  |
| Z                                 | 2                                                             |                  |
| Density (calculated)              | 1.983 Mg/m <sup>3</sup>                                       |                  |
| Absorption coefficient            | 7.773 mm <sup>-1</sup>                                        |                  |
| F(000)                            | 300                                                           |                  |
| Crystal size                      | 0.43 x 0.08 x 0.05 mm <sup>3</sup>                            |                  |
| Theta range for data collection   | 3.152 to 27.481°.                                             |                  |
| Index ranges                      | -7 ≤ h ≤ 7, -10 ≤ k ≤ 10, -14 ≤ l ≤ 14                        |                  |
| Reflections collected             | 11171                                                         |                  |
| Independent reflections           | 2382 [R(int) = 0.0436]                                        |                  |
| Completeness to theta = 25.242°   | 99.9 %                                                        |                  |
| Absorption correction             | Semi-empirical from equivalents                               |                  |
| Max. and min. transmission        | 1.00000 and 0.47158                                           |                  |
| Refinement method                 | Full-matrix least-squares on F <sup>2</sup>                   |                  |
| Data / restraints / parameters    | 2382 / 1 / 120                                                |                  |
| Goodness-of-fit on F <sup>2</sup> | 1.058                                                         |                  |
| Final R indices [I > 2σ(I)]       | R1 = 0.0300, wR2 = 0.0693                                     |                  |
| R indices (all data)              | R1 = 0.0329, wR2 = 0.0706                                     |                  |
| Absolute structure parameter      | 0.001(11)                                                     |                  |
| Extinction coefficient            | n/a                                                           |                  |
| Largest diff. peak and hole       | 0.735 and -0.492 e.Å <sup>-3</sup>                            |                  |

Table 2. Atomic coordinates ( $\times 10^4$ ) and equivalent isotropic displacement parameters ( $\text{\AA}^2 \times 10^3$ ) for **2a**.  $U(\text{eq})$  is defined as one third of the trace of the orthogonalized  $U^{\text{ij}}$  tensor.

|       | x        | y       | z       | U(eq) |
|-------|----------|---------|---------|-------|
| Br(1) | 522(1)   | 8839(1) | 5193(1) | 40(1) |
| Br(2) | 6064(1)  | 1164(1) | 7144(1) | 30(1) |
| O(1)  | 7843(5)  | 3799(5) | 9235(3) | 24(1) |
| O(2)  | 1448(6)  | 1610(5) | 9407(3) | 27(1) |
| C(1)  | 4271(9)  | 4942(7) | 8026(5) | 20(1) |
| C(2)  | 5227(10) | 5434(7) | 7034(5) | 23(1) |
| C(3)  | 4175(10) | 6594(7) | 6218(5) | 28(1) |
| C(4)  | 2083(9)  | 7289(7) | 6350(5) | 26(1) |
| C(5)  | 1104(9)  | 6843(7) | 7332(5) | 26(1) |
| C(6)  | 2210(9)  | 5691(7) | 8158(5) | 24(1) |
| C(7)  | 5387(8)  | 3646(7) | 8936(4) | 20(1) |
| C(8)  | 4831(8)  | 1839(7) | 8562(5) | 20(1) |
| C(9)  | 2263(9)  | 1432(8) | 8295(5) | 24(1) |

Table 3. Bond lengths [ $\text{\AA}$ ] and angles [ $^\circ$ ] for **2a**.

---

|                 |          |
|-----------------|----------|
| Br(1)-C(4)      | 1.894(5) |
| Br(2)-C(8)      | 1.954(5) |
| O(1)-C(7)       | 1.429(5) |
| O(1)-H(1)       | 0.8200   |
| O(2)-C(9)       | 1.431(6) |
| O(2)-H(2)       | 0.8200   |
| C(1)-C(6)       | 1.393(7) |
| C(1)-C(2)       | 1.402(7) |
| C(1)-C(7)       | 1.509(7) |
| C(2)-C(3)       | 1.362(8) |
| C(2)-H(2A)      | 0.9300   |
| C(3)-C(4)       | 1.392(8) |
| C(3)-H(3)       | 0.9300   |
| C(4)-C(5)       | 1.389(8) |
| C(5)-C(6)       | 1.374(8) |
| C(5)-H(5)       | 0.9300   |
| C(6)-H(6)       | 0.9300   |
| C(7)-C(8)       | 1.522(7) |
| C(7)-H(7)       | 0.9800   |
| C(8)-C(9)       | 1.523(7) |
| C(8)-H(8)       | 0.9800   |
| C(9)-H(9A)      | 0.9700   |
| C(9)-H(9B)      | 0.9700   |
| C(7)-O(1)-H(1)  | 109.5    |
| C(9)-O(2)-H(2)  | 109.5    |
| C(6)-C(1)-C(2)  | 117.7(5) |
| C(6)-C(1)-C(7)  | 119.8(5) |
| C(2)-C(1)-C(7)  | 122.5(5) |
| C(3)-C(2)-C(1)  | 121.4(5) |
| C(3)-C(2)-H(2A) | 119.3    |
| C(1)-C(2)-H(2A) | 119.3    |
| C(2)-C(3)-C(4)  | 119.7(5) |
| C(2)-C(3)-H(3)  | 120.1    |
| C(4)-C(3)-H(3)  | 120.1    |
| C(5)-C(4)-C(3)  | 120.2(5) |
| C(5)-C(4)-Br(1) | 119.1(4) |

|                  |          |
|------------------|----------|
| C(3)-C(4)-Br(1)  | 120.6(4) |
| C(6)-C(5)-C(4)   | 119.2(5) |
| C(6)-C(5)-H(5)   | 120.4    |
| C(4)-C(5)-H(5)   | 120.4    |
| C(5)-C(6)-C(1)   | 121.6(5) |
| C(5)-C(6)-H(6)   | 119.2    |
| C(1)-C(6)-H(6)   | 119.2    |
| O(1)-C(7)-C(1)   | 112.6(4) |
| O(1)-C(7)-C(8)   | 107.4(4) |
| C(1)-C(7)-C(8)   | 115.3(4) |
| O(1)-C(7)-H(7)   | 107.1    |
| C(1)-C(7)-H(7)   | 107.1    |
| C(8)-C(7)-H(7)   | 107.1    |
| C(7)-C(8)-C(9)   | 114.1(4) |
| C(7)-C(8)-Br(2)  | 113.0(3) |
| C(9)-C(8)-Br(2)  | 107.6(4) |
| C(7)-C(8)-H(8)   | 107.3    |
| C(9)-C(8)-H(8)   | 107.3    |
| Br(2)-C(8)-H(8)  | 107.3    |
| O(2)-C(9)-C(8)   | 107.8(4) |
| O(2)-C(9)-H(9A)  | 110.1    |
| C(8)-C(9)-H(9A)  | 110.1    |
| O(2)-C(9)-H(9B)  | 110.1    |
| C(8)-C(9)-H(9B)  | 110.1    |
| H(9A)-C(9)-H(9B) | 108.5    |

---

Symmetry transformations used to generate equivalent atoms:

Table 4. Anisotropic displacement parameters ( $\text{\AA}^2 \times 10^3$ ) for **2a**. The anisotropic displacement factor exponent takes the form:  $-2^2 [ h^2 a^* U^{11} + \dots + 2 h k a^* b^* U^{12} ]$ .

|       | $U^{11}$ | $U^{22}$ | $U^{33}$ | $U^{23}$ | $U^{13}$ | $U^{12}$ |
|-------|----------|----------|----------|----------|----------|----------|
| Br(1) | 50(1)    | 29(1)    | 34(1)    | 7(1)     | -9(1)    | 6(1)     |
| Br(2) | 30(1)    | 30(1)    | 32(1)    | -11(1)   | 11(1)    | -3(1)    |
| O(1)  | 17(2)    | 24(2)    | 27(2)    | -6(2)    | 0(1)     | 0(2)     |
| O(2)  | 22(2)    | 28(2)    | 33(2)    | 9(2)     | 10(2)    | 6(2)     |
| C(1)  | 16(2)    | 19(3)    | 22(3)    | -3(2)    | 2(2)     | -4(2)    |
| C(2)  | 22(3)    | 21(3)    | 27(3)    | -1(2)    | 5(2)     | -2(2)    |
| C(3)  | 32(3)    | 29(3)    | 24(3)    | -2(2)    | 6(2)     | -6(2)    |
| C(4)  | 29(3)    | 18(3)    | 25(3)    | 2(2)     | -9(2)    | -2(2)    |
| C(5)  | 18(2)    | 24(3)    | 33(3)    | 0(2)     | 1(2)     | 0(2)     |
| C(6)  | 21(3)    | 19(3)    | 31(3)    | 1(2)     | 7(2)     | -2(2)    |
| C(7)  | 18(2)    | 23(3)    | 20(2)    | -1(2)    | 6(2)     | -1(2)    |
| C(8)  | 18(2)    | 19(2)    | 23(3)    | -1(2)    | 5(2)     | 1(2)     |
| C(9)  | 20(2)    | 24(3)    | 27(3)    | 2(2)     | 4(2)     | -4(2)    |

Table 5. Hydrogen coordinates ( $\times 10^4$ ) and isotropic displacement parameters ( $\text{\AA}^2 \times 10^3$ ) for **2a**.

|       | x    | y    | z    | U(eq) |
|-------|------|------|------|-------|
| H(1)  | 8195 | 4647 | 9641 | 35    |
| H(2)  | 210  | 2106 | 9273 | 40    |
| H(2A) | 6610 | 4959 | 6931 | 28    |
| H(3)  | 4852 | 6920 | 5574 | 34    |
| H(5)  | -281 | 7319 | 7430 | 31    |
| H(6)  | 1565 | 5403 | 8822 | 28    |
| H(7)  | 4820 | 3839 | 9688 | 24    |
| H(8)  | 5565 | 1132 | 9246 | 24    |
| H(9A) | 1438 | 2190 | 7683 | 29    |
| H(9B) | 2012 | 298  | 7991 | 29    |

Table 6. Torsion angles [°] for **2a**.

---

|                      |           |
|----------------------|-----------|
| C(6)-C(1)-C(2)-C(3)  | -0.6(8)   |
| C(7)-C(1)-C(2)-C(3)  | 179.3(5)  |
| C(1)-C(2)-C(3)-C(4)  | -1.2(8)   |
| C(2)-C(3)-C(4)-C(5)  | 2.0(8)    |
| C(2)-C(3)-C(4)-Br(1) | -177.5(4) |
| C(3)-C(4)-C(5)-C(6)  | -1.0(8)   |
| Br(1)-C(4)-C(5)-C(6) | 178.5(4)  |
| C(4)-C(5)-C(6)-C(1)  | -0.9(8)   |
| C(2)-C(1)-C(6)-C(5)  | 1.6(8)    |
| C(7)-C(1)-C(6)-C(5)  | -178.2(5) |
| C(6)-C(1)-C(7)-O(1)  | -140.4(5) |
| C(2)-C(1)-C(7)-O(1)  | 39.7(7)   |
| C(6)-C(1)-C(7)-C(8)  | 95.9(6)   |
| C(2)-C(1)-C(7)-C(8)  | -84.0(6)  |
| O(1)-C(7)-C(8)-C(9)  | 176.0(4)  |
| C(1)-C(7)-C(8)-C(9)  | -57.6(6)  |
| O(1)-C(7)-C(8)-Br(2) | -60.6(4)  |
| C(1)-C(7)-C(8)-Br(2) | 65.8(5)   |
| C(7)-C(8)-C(9)-O(2)  | -65.1(6)  |
| Br(2)-C(8)-C(9)-O(2) | 168.7(4)  |

---

Symmetry transformations used to generate equivalent atoms:



Table 7. Hydrogen bonds for **2a** [Å and °].

| D-H...A            | d(D-H) | d(H...A) | d(D...A) | <(DHA) |
|--------------------|--------|----------|----------|--------|
| O(1)-H(1)...O(2)#1 | 0.82   | 1.89     | 2.699(6) | 171.7  |
| O(2)-H(2)...O(1)#2 | 0.82   | 1.94     | 2.736(5) | 162.7  |

Symmetry transformations used to generate equivalent atoms:

#1 -x+1,y+1/2,-z+2    #2 x-1,y,z

The X-ray structure of compound **2e**

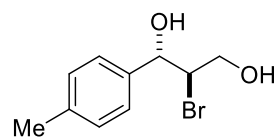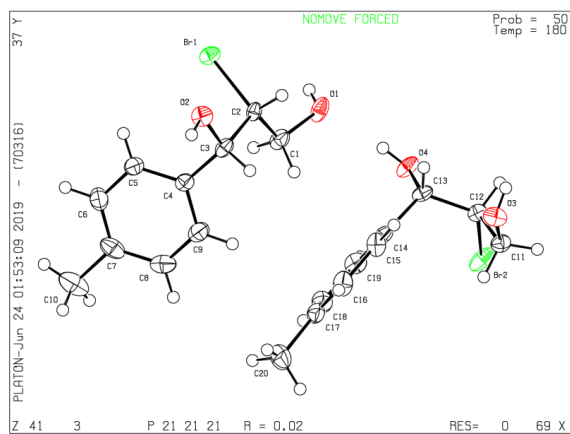

Table 1. Crystal data and structure refinement for **2e**.

|                                   |                                                  |          |
|-----------------------------------|--------------------------------------------------|----------|
| Identification code               | <b>2e</b>                                        |          |
| Empirical formula                 | C <sub>10</sub> H <sub>13</sub> BrO <sub>2</sub> |          |
| Formula weight                    | 245.11                                           |          |
| Temperature                       | 180.00(10) K                                     |          |
| Wavelength                        | 0.71073 Å                                        |          |
| Crystal system                    | Orthorhombic                                     |          |
| Space group                       | P2 <sub>1</sub>                                  |          |
| Unit cell dimensions              | a = 8.30480(10) Å                                | α = 90°. |
|                                   | b = 9.2603(2) Å                                  | β = 90°. |
|                                   | c = 27.0823(7) Å                                 | γ = 90°. |
| Volume                            | 2082.76(7) Å <sup>3</sup>                        |          |
| Z                                 | 8                                                |          |
| Density (calculated)              | 1.563 Mg/m <sup>3</sup>                          |          |
| Absorption coefficient            | 3.913 mm <sup>-1</sup>                           |          |
| F(000)                            | 992                                              |          |
| Crystal size                      | 0.42 x 0.08 x 0.04 mm <sup>3</sup>               |          |
| Theta range for data collection   | 2.324 to 27.484°.                                |          |
| Index ranges                      | -10 ≤ h ≤ 10, -12 ≤ k ≤ 12, -35 ≤ l ≤ 35         |          |
| Reflections collected             | 48490                                            |          |
| Independent reflections           | 4767 [R(int) = 0.0444]                           |          |
| Completeness to theta = 25.242°   | 100.0 %                                          |          |
| Absorption correction             | Semi-empirical from equivalents                  |          |
| Max. and min. transmission        | 1.00000 and 0.75718                              |          |
| Refinement method                 | Full-matrix least-squares on F <sup>2</sup>      |          |
| Data / restraints / parameters    | 4767 / 4 / 249                                   |          |
| Goodness-of-fit on F <sup>2</sup> | 1.013                                            |          |
| Final R indices [I > 2σ(I)]       | R1 = 0.0229, wR2 = 0.0499                        |          |
| R indices (all data)              | R1 = 0.0257, wR2 = 0.0507                        |          |
| Absolute structure parameter      | -0.006(3)                                        |          |
| Extinction coefficient            | n/a                                              |          |
| Largest diff. peak and hole       | 0.277 and -0.335 e.Å <sup>-3</sup>               |          |

Table 2. Atomic coordinates ( $\times 10^4$ ) and equivalent isotropic displacement parameters ( $\text{\AA}^2 \times 10^3$ ) for **2e**.  
 $U(\text{eq})$  is defined as one third of the trace of the orthogonalized  $U^{ij}$  tensor.

|       | x       | y       | z       | U(eq) |
|-------|---------|---------|---------|-------|
| Br(1) | -600(1) | 1450(1) | 4592(1) | 24(1) |
| O(1)  | 1555(2) | 4480(2) | 4524(1) | 31(1) |
| O(2)  | 2170(3) | -656(2) | 4349(1) | 25(1) |
| C(1)  | 1735(4) | 3347(3) | 4173(1) | 28(1) |
| C(2)  | 1638(3) | 1867(3) | 4407(1) | 19(1) |
| C(3)  | 2352(3) | 671(3)  | 4085(1) | 22(1) |
| C(4)  | 1700(3) | 586(3)  | 3566(1) | 22(1) |
| C(5)  | 325(4)  | -198(3) | 3449(1) | 27(1) |
| C(6)  | -250(4) | -230(4) | 2967(1) | 33(1) |
| C(7)  | 506(4)  | 496(4)  | 2590(1) | 34(1) |
| C(8)  | 1884(4) | 1274(4) | 2707(1) | 35(1) |
| C(9)  | 2474(4) | 1326(4) | 3184(1) | 30(1) |
| C(10) | -108(5) | 426(5)  | 2064(1) | 49(1) |
| Br(2) | 6180(1) | 8809(1) | 3907(1) | 33(1) |
| O(3)  | 8608(3) | 5726(2) | 4723(1) | 28(1) |
| O(4)  | 3708(2) | 6716(2) | 4387(1) | 27(1) |
| C(11) | 8247(3) | 6911(3) | 4405(1) | 24(1) |
| C(12) | 6479(3) | 7335(3) | 4427(1) | 22(1) |
| C(13) | 5285(3) | 6104(3) | 4364(1) | 21(1) |
| C(14) | 5546(3) | 5176(3) | 3911(1) | 20(1) |
| C(15) | 6551(4) | 3975(3) | 3939(1) | 27(1) |
| C(16) | 6871(4) | 3142(3) | 3525(1) | 31(1) |
| C(17) | 6183(4) | 3478(3) | 3074(1) | 29(1) |
| C(18) | 5144(4) | 4644(3) | 3052(1) | 31(1) |
| C(19) | 4826(4) | 5491(3) | 3461(1) | 28(1) |
| C(20) | 6562(5) | 2614(4) | 2615(1) | 43(1) |

Table 3. Bond lengths [ $\text{\AA}$ ] and angles [ $^\circ$ ] for **2e**.

---

|              |          |
|--------------|----------|
| Br(1)-C(2)   | 1.963(3) |
| O(1)-C(1)    | 1.424(4) |
| O(1)-H(1)    | 0.80(2)  |
| O(2)-C(3)    | 1.431(3) |
| O(2)-H(2)    | 0.79(2)  |
| C(1)-C(2)    | 1.512(4) |
| C(1)-H(1A)   | 0.9700   |
| C(1)-H(1B)   | 0.9700   |
| C(2)-C(3)    | 1.530(4) |
| C(2)-H(2A)   | 0.9800   |
| C(3)-C(4)    | 1.507(4) |
| C(3)-H(3A)   | 0.9800   |
| C(4)-C(5)    | 1.390(4) |
| C(4)-C(9)    | 1.397(4) |
| C(5)-C(6)    | 1.391(4) |
| C(5)-H(5)    | 0.9300   |
| C(6)-C(7)    | 1.375(5) |
| C(6)-H(6)    | 0.9300   |
| C(7)-C(8)    | 1.388(5) |
| C(7)-C(10)   | 1.514(5) |
| C(8)-C(9)    | 1.383(4) |
| C(8)-H(8)    | 0.9300   |
| C(9)-H(9)    | 0.9300   |
| C(10)-H(10A) | 0.9600   |
| C(10)-H(10B) | 0.9600   |
| C(10)-H(10C) | 0.9600   |
| Br(2)-C(12)  | 1.976(3) |
| O(3)-C(11)   | 1.427(4) |
| O(3)-H(3)    | 0.79(2)  |
| O(4)-C(13)   | 1.429(3) |
| O(4)-H(4)    | 0.82(2)  |
| C(11)-C(12)  | 1.521(4) |
| C(11)-H(11A) | 0.9700   |
| C(11)-H(11B) | 0.9700   |
| C(12)-C(13)  | 1.520(4) |
| C(12)-H(12)  | 0.9800   |

|                  |            |
|------------------|------------|
| C(13)-C(14)      | 1.514(4)   |
| C(13)-H(13)      | 0.9800     |
| C(14)-C(19)      | 1.389(4)   |
| C(14)-C(15)      | 1.392(4)   |
| C(15)-C(16)      | 1.386(4)   |
| C(15)-H(15)      | 0.9300     |
| C(16)-C(17)      | 1.386(5)   |
| C(16)-H(16)      | 0.9300     |
| C(17)-C(18)      | 1.384(4)   |
| C(17)-C(20)      | 1.511(4)   |
| C(18)-C(19)      | 1.384(4)   |
| C(18)-H(18)      | 0.9300     |
| C(19)-H(19)      | 0.9300     |
| C(20)-H(20A)     | 0.9600     |
| C(20)-H(20B)     | 0.9600     |
| C(20)-H(20C)     | 0.9600     |
| C(1)-O(1)-H(1)   | 113(3)     |
| C(3)-O(2)-H(2)   | 109(3)     |
| O(1)-C(1)-C(2)   | 112.5(3)   |
| O(1)-C(1)-H(1A)  | 109.1      |
| C(2)-C(1)-H(1A)  | 109.1      |
| O(1)-C(1)-H(1B)  | 109.1      |
| C(2)-C(1)-H(1B)  | 109.1      |
| H(1A)-C(1)-H(1B) | 107.8      |
| C(1)-C(2)-C(3)   | 113.3(2)   |
| C(1)-C(2)-Br(1)  | 109.58(19) |
| C(3)-C(2)-Br(1)  | 111.75(19) |
| C(1)-C(2)-H(2A)  | 107.3      |
| C(3)-C(2)-H(2A)  | 107.3      |
| Br(1)-C(2)-H(2A) | 107.3      |
| O(2)-C(3)-C(4)   | 112.6(2)   |
| O(2)-C(3)-C(2)   | 107.1(2)   |
| C(4)-C(3)-C(2)   | 115.5(2)   |
| O(2)-C(3)-H(3A)  | 107.1      |
| C(4)-C(3)-H(3A)  | 107.1      |
| C(2)-C(3)-H(3A)  | 107.1      |
| C(5)-C(4)-C(9)   | 117.8(3)   |
| C(5)-C(4)-C(3)   | 122.3(3)   |

|                     |          |
|---------------------|----------|
| C(9)-C(4)-C(3)      | 119.9(3) |
| C(4)-C(5)-C(6)      | 120.5(3) |
| C(4)-C(5)-H(5)      | 119.8    |
| C(6)-C(5)-H(5)      | 119.8    |
| C(7)-C(6)-C(5)      | 122.0(3) |
| C(7)-C(6)-H(6)      | 119.0    |
| C(5)-C(6)-H(6)      | 119.0    |
| C(6)-C(7)-C(8)      | 117.4(3) |
| C(6)-C(7)-C(10)     | 121.6(3) |
| C(8)-C(7)-C(10)     | 121.0(3) |
| C(9)-C(8)-C(7)      | 121.6(3) |
| C(9)-C(8)-H(8)      | 119.2    |
| C(7)-C(8)-H(8)      | 119.2    |
| C(8)-C(9)-C(4)      | 120.8(3) |
| C(8)-C(9)-H(9)      | 119.6    |
| C(4)-C(9)-H(9)      | 119.6    |
| C(7)-C(10)-H(10A)   | 109.5    |
| C(7)-C(10)-H(10B)   | 109.5    |
| H(10A)-C(10)-H(10B) | 109.5    |
| C(7)-C(10)-H(10C)   | 109.5    |
| H(10A)-C(10)-H(10C) | 109.5    |
| H(10B)-C(10)-H(10C) | 109.5    |
| C(11)-O(3)-H(3)     | 112(3)   |
| C(13)-O(4)-H(4)     | 107(3)   |
| O(3)-C(11)-C(12)    | 112.2(2) |
| O(3)-C(11)-H(11A)   | 109.2    |
| C(12)-C(11)-H(11A)  | 109.2    |
| O(3)-C(11)-H(11B)   | 109.2    |
| C(12)-C(11)-H(11B)  | 109.2    |
| H(11A)-C(11)-H(11B) | 107.9    |
| C(13)-C(12)-C(11)   | 115.6(2) |
| C(13)-C(12)-Br(2)   | 110.9(2) |
| C(11)-C(12)-Br(2)   | 105.8(2) |
| C(13)-C(12)-H(12)   | 108.1    |
| C(11)-C(12)-H(12)   | 108.1    |
| Br(2)-C(12)-H(12)   | 108.1    |
| O(4)-C(13)-C(14)    | 113.0(2) |
| O(4)-C(13)-C(12)    | 107.2(2) |

|                     |          |
|---------------------|----------|
| C(14)-C(13)-C(12)   | 115.0(2) |
| O(4)-C(13)-H(13)    | 107.1    |
| C(14)-C(13)-H(13)   | 107.1    |
| C(12)-C(13)-H(13)   | 107.1    |
| C(19)-C(14)-C(15)   | 118.2(3) |
| C(19)-C(14)-C(13)   | 122.0(2) |
| C(15)-C(14)-C(13)   | 119.7(3) |
| C(16)-C(15)-C(14)   | 121.1(3) |
| C(16)-C(15)-H(15)   | 119.5    |
| C(14)-C(15)-H(15)   | 119.5    |
| C(17)-C(16)-C(15)   | 120.6(3) |
| C(17)-C(16)-H(16)   | 119.7    |
| C(15)-C(16)-H(16)   | 119.7    |
| C(18)-C(17)-C(16)   | 118.0(3) |
| C(18)-C(17)-C(20)   | 120.6(3) |
| C(16)-C(17)-C(20)   | 121.4(3) |
| C(17)-C(18)-C(19)   | 121.8(3) |
| C(17)-C(18)-H(18)   | 119.1    |
| C(19)-C(18)-H(18)   | 119.1    |
| C(18)-C(19)-C(14)   | 120.1(3) |
| C(18)-C(19)-H(19)   | 119.9    |
| C(14)-C(19)-H(19)   | 119.9    |
| C(17)-C(20)-H(20A)  | 109.5    |
| C(17)-C(20)-H(20B)  | 109.5    |
| H(20A)-C(20)-H(20B) | 109.5    |
| C(17)-C(20)-H(20C)  | 109.5    |
| H(20A)-C(20)-H(20C) | 109.5    |
| H(20B)-C(20)-H(20C) | 109.5    |

---

Symmetry transformations used to generate equivalent atoms:



Table 4. Anisotropic displacement parameters ( $\text{\AA}^2 \times 10^3$ ) for **2e**. The anisotropic displacement factor exponent takes the form:  $-2^{-2} [h^2 a^* 2U^{11} + \dots + 2 h k a^* b^* U^{12}]$ .

|       | $U^{11}$ | $U^{22}$ | $U^{33}$ | $U^{23}$ | $U^{13}$ | $U^{12}$ |
|-------|----------|----------|----------|----------|----------|----------|
| Br(1) | 21(1)    | 21(1)    | 30(1)    | 3(1)     | 5(1)     | 3(1)     |
| O(1)  | 19(1)    | 18(1)    | 55(2)    | -8(1)    | 4(1)     | -1(1)    |
| O(2)  | 26(1)    | 18(1)    | 32(1)    | 0(1)     | 3(1)     | 8(1)     |
| C(1)  | 25(2)    | 19(2)    | 39(2)    | -2(1)    | 7(1)     | -1(1)    |
| C(2)  | 14(1)    | 18(1)    | 26(1)    | -1(1)    | -2(1)    | 0(1)     |
| C(3)  | 16(1)    | 18(1)    | 32(2)    | 3(1)     | 2(1)     | 0(1)     |
| C(4)  | 19(1)    | 18(1)    | 27(2)    | -2(1)    | 4(1)     | 3(1)     |
| C(5)  | 27(2)    | 27(2)    | 27(2)    | -1(1)    | 5(1)     | -3(1)    |
| C(6)  | 29(2)    | 35(2)    | 34(2)    | -10(1)   | -2(1)    | -3(1)    |
| C(7)  | 37(2)    | 39(2)    | 26(2)    | -7(1)    | 2(2)     | 13(2)    |
| C(8)  | 38(2)    | 36(2)    | 31(2)    | 3(2)     | 12(1)    | 5(2)     |
| C(9)  | 27(2)    | 27(2)    | 36(2)    | 0(1)     | 7(1)     | -3(1)    |
| C(10) | 52(2)    | 67(3)    | 29(2)    | -8(2)    | 0(2)     | 17(2)    |
| Br(2) | 23(1)    | 22(1)    | 54(1)    | 15(1)    | 4(1)     | -1(1)    |
| O(3)  | 28(1)    | 33(1)    | 25(1)    | 3(1)     | 1(1)     | 10(1)    |
| O(4)  | 18(1)    | 16(1)    | 47(1)    | 3(1)     | 10(1)    | 2(1)     |
| C(11) | 18(1)    | 28(2)    | 26(2)    | 1(1)     | 2(1)     | 2(1)     |
| C(12) | 22(2)    | 20(1)    | 26(2)    | 2(1)     | 4(1)     | 1(1)     |
| C(13) | 18(1)    | 18(1)    | 28(1)    | 5(1)     | 7(1)     | 4(1)     |
| C(14) | 16(1)    | 17(1)    | 27(1)    | 2(1)     | 4(1)     | 1(1)     |
| C(15) | 26(2)    | 20(1)    | 35(2)    | -1(1)    | -7(1)    | 4(1)     |
| C(16) | 23(2)    | 24(2)    | 47(2)    | -8(1)    | -3(1)    | 5(1)     |
| C(17) | 28(1)    | 25(2)    | 34(2)    | -7(1)    | 6(1)     | -7(1)    |
| C(18) | 36(2)    | 28(2)    | 27(2)    | 4(1)     | -4(1)    | -2(1)    |
| C(19) | 28(2)    | 20(1)    | 34(2)    | 4(1)     | 2(1)     | 5(1)     |
| C(20) | 48(2)    | 37(2)    | 45(2)    | -19(2)   | 5(2)     | -5(2)    |

Table 5. Hydrogen coordinates ( $\times 10^4$ ) and isotropic displacement parameters ( $\text{\AA}^2 \times 10^3$ ) for **2e**.

|        | x        | y         | z        | U(eq) |
|--------|----------|-----------|----------|-------|
| H(1)   | 640(30)  | 4670(40)  | 4579(14) | 46    |
| H(2)   | 2690(40) | -1260(30) | 4215(12) | 38    |
| H(1A)  | 2767     | 3448      | 4009     | 33    |
| H(1B)  | 899      | 3433      | 3925     | 33    |
| H(2A)  | 2269     | 1899      | 4713     | 23    |
| H(3A)  | 3510     | 859       | 4058     | 26    |
| H(5)   | -215     | -705      | 3695     | 32    |
| H(6)   | -1175    | -759      | 2898     | 39    |
| H(8)   | 2422     | 1772      | 2459     | 42    |
| H(9)   | 3397     | 1859      | 3252     | 36    |
| H(10A) | 569      | -203      | 1874     | 74    |
| H(10B) | -94      | 1376      | 1922     | 74    |
| H(10C) | -1190    | 61        | 2063     | 74    |
| H(3)   | 8310(50) | 5860(40)  | 4998(9)  | 43    |
| H(4)   | 3080(40) | 6060(30)  | 4451(13) | 41    |
| H(11A) | 8524     | 6653      | 4069     | 29    |
| H(11B) | 8902     | 7734      | 4499     | 29    |
| H(12)  | 6277     | 7792      | 4747     | 27    |
| H(13)  | 5402     | 5474      | 4653     | 25    |
| H(15)  | 7015     | 3728      | 4240     | 32    |
| H(16)  | 7555     | 2350      | 3551     | 37    |
| H(18)  | 4646     | 4865      | 2754     | 37    |
| H(19)  | 4128     | 6273      | 3435     | 33    |
| H(20A) | 7460     | 3043      | 2446     | 65    |
| H(20B) | 5641     | 2609      | 2400     | 65    |
| H(20C) | 6826     | 1640      | 2706     | 65    |

Table 6. Torsion angles [°] for **2e**.

---

|                         |           |
|-------------------------|-----------|
| O(1)-C(1)-C(2)-C(3)     | -161.3(2) |
| O(1)-C(1)-C(2)-Br(1)    | 73.1(3)   |
| C(1)-C(2)-C(3)-O(2)     | -179.7(2) |
| Br(1)-C(2)-C(3)-O(2)    | -55.3(3)  |
| C(1)-C(2)-C(3)-C(4)     | -53.4(3)  |
| Br(1)-C(2)-C(3)-C(4)    | 71.0(3)   |
| O(2)-C(3)-C(4)-C(5)     | 36.5(4)   |
| C(2)-C(3)-C(4)-C(5)     | -87.0(3)  |
| O(2)-C(3)-C(4)-C(9)     | -144.2(3) |
| C(2)-C(3)-C(4)-C(9)     | 92.4(3)   |
| C(9)-C(4)-C(5)-C(6)     | -0.3(4)   |
| C(3)-C(4)-C(5)-C(6)     | 179.0(3)  |
| C(4)-C(5)-C(6)-C(7)     | 0.2(5)    |
| C(5)-C(6)-C(7)-C(8)     | 0.0(5)    |
| C(5)-C(6)-C(7)-C(10)    | 178.6(3)  |
| C(6)-C(7)-C(8)-C(9)     | -0.3(5)   |
| C(10)-C(7)-C(8)-C(9)    | -178.8(3) |
| C(7)-C(8)-C(9)-C(4)     | 0.2(5)    |
| C(5)-C(4)-C(9)-C(8)     | 0.0(5)    |
| C(3)-C(4)-C(9)-C(8)     | -179.3(3) |
| O(3)-C(11)-C(12)-C(13)  | -50.1(4)  |
| O(3)-C(11)-C(12)-Br(2)  | -173.2(2) |
| C(11)-C(12)-C(13)-O(4)  | -179.0(2) |
| Br(2)-C(12)-C(13)-O(4)  | -58.6(2)  |
| C(11)-C(12)-C(13)-C(14) | -52.4(4)  |
| Br(2)-C(12)-C(13)-C(14) | 68.0(3)   |
| O(4)-C(13)-C(14)-C(19)  | 33.7(4)   |
| C(12)-C(13)-C(14)-C(19) | -89.8(3)  |
| O(4)-C(13)-C(14)-C(15)  | -147.0(3) |
| C(12)-C(13)-C(14)-C(15) | 89.4(3)   |
| C(19)-C(14)-C(15)-C(16) | 2.2(4)    |
| C(13)-C(14)-C(15)-C(16) | -177.1(3) |
| C(14)-C(15)-C(16)-C(17) | -0.7(5)   |
| C(15)-C(16)-C(17)-C(18) | -1.4(5)   |
| C(15)-C(16)-C(17)-C(20) | 177.9(3)  |
| C(16)-C(17)-C(18)-C(19) | 2.0(5)    |

|                         |           |
|-------------------------|-----------|
| C(20)-C(17)-C(18)-C(19) | -177.3(3) |
| C(17)-C(18)-C(19)-C(14) | -0.5(5)   |
| C(15)-C(14)-C(19)-C(18) | -1.6(4)   |
| C(13)-C(14)-C(19)-C(18) | 177.6(3)  |

---

Symmetry transformations used to generate equivalent atoms:

Table 7. Hydrogen bonds for **2e** [Å and °].

| D-H...A            | d(D-H)  | d(H...A) | d(D...A) | <(DHA) |
|--------------------|---------|----------|----------|--------|
| O(1)-H(1)...O(3)#1 | 0.80(2) | 1.99(2)  | 2.759(3) | 163(4) |
| O(2)-H(2)...O(4)#2 | 0.79(2) | 2.11(3)  | 2.750(3) | 138(3) |
| O(3)-H(3)...O(2)#3 | 0.79(2) | 2.01(2)  | 2.781(3) | 163(4) |
| O(4)-H(4)...O(1)   | 0.82(2) | 1.94(2)  | 2.760(3) | 174(4) |

Symmetry transformations used to generate equivalent atoms:

#1  $x-1, y, z$     #2  $x, y-1, z$     #3  $x+1/2, -y+1/2, -z+1$

## The X-ray structure of compound **12**

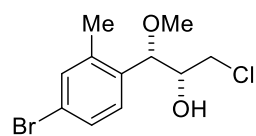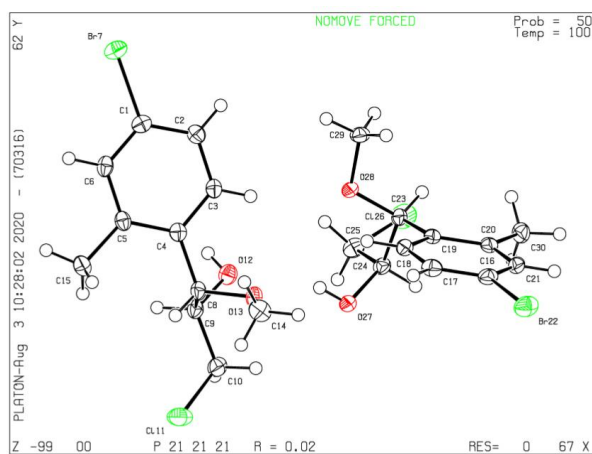

Table 1. Crystal data and structure refinement for **12**.

|                                   |                                                    |          |
|-----------------------------------|----------------------------------------------------|----------|
| Identification code               | <b>12</b>                                          |          |
| Empirical formula                 | C <sub>11</sub> H <sub>14</sub> BrClO <sub>2</sub> |          |
| Formula weight                    | 293.59                                             |          |
| Temperature                       | 99.99(10) K                                        |          |
| Wavelength                        | 0.71073 Å                                          |          |
| Crystal system                    | orthorhombic                                       |          |
| Space group                       | P2 <sub>1</sub>                                    |          |
| Unit cell dimensions              | a = 10.45924(4) Å                                  | α = 90°. |
|                                   | b = 10.51707(4) Å                                  | β = 90°. |
|                                   | c = 22.10012(8) Å                                  | γ = 90°. |
| Volume                            | 2431.027(16) Å <sup>3</sup>                        |          |
| Z                                 | 4                                                  |          |
| Density (calculated)              | 1.604 Mg/m <sup>3</sup>                            |          |
| Absorption coefficient            | 6.465 mm <sup>-1</sup>                             |          |
| F(000)                            | 1184.0                                             |          |
| Crystal size                      | 0.2 x 0.15 x 0.1 mm <sup>3</sup>                   |          |
| Theta range for data collection   | 8.002 to 151.056°.                                 |          |
| Index ranges                      | -13 ≤ h ≤ 12, -13 ≤ k ≤ 12, -27 ≤ l ≤ 27           |          |
| Reflections collected             | 58808                                              |          |
| Independent reflections           | 4930 [R(int) = 0.0345]                             |          |
| Completeness to theta = 25.242°   | 100 %                                              |          |
| Absorption correction             | Semi-empirical from equivalents                    |          |
| Max. and min. transmission        | 1.00000 and 0.75235                                |          |
| Refinement method                 | Full-matrix least-squares on F <sup>2</sup>        |          |
| Data / restraints / parameters    | 4930 / 0 / 277                                     |          |
| Goodness-of-fit on F <sup>2</sup> | 1.080                                              |          |
| Final R indices [I > 2σ(I)]       | R1 = 0.0174, wR2 = 0.0432                          |          |
| R indices (all data)              | R1 = 0.0174, wR2 = 0.0432                          |          |
| Absolute structure parameter      | 0.001(3)                                           |          |
| Extinction coefficient            | n/a                                                |          |
| Largest diff. peak and hole       | 0.33 and -0.51 e.Å <sup>-3</sup>                   |          |

Table 2. Fractional atomic coordinates ( $\times 10^4$ ) and equivalent isotropic displacement parameters ( $\text{\AA}^2 \times 10^3$ ) for **12**.  $U(\text{eq})$  is defined as one third of the trace of the orthogonalized  $U^{\text{ij}}$  tensor.

|        | x          | y          | z          | U(eq)     |
|--------|------------|------------|------------|-----------|
| Br(7)  | 9565.1(3)  | 8009.0(2)  | 7853.5(2)  | 26.28(7)  |
| Br(22) | 9170.2(3)  | -2819.2(3) | 5709.3(2)  | 30.95(7)  |
| Cl(26) | 3507.3(6)  | 3543.1(7)  | 5686.5(3)  | 33.89(15) |
| Cl(11) | 4645.8(7)  | 1423.1(6)  | 9157.2(3)  | 32.70(14) |
| O(28)  | 6939.1(15) | 3148.7(16) | 6345.8(7)  | 18.3(3)   |
| O(27)  | 5255.0(16) | 1469.4(16) | 6938.3(7)  | 19.0(3)   |
| O(13)  | 6785.2(15) | 2083.2(16) | 7908.9(7)  | 19.9(3)   |
| O(12)  | 4793.9(17) | 3893.9(17) | 7805.4(8)  | 22.4(3)   |
| C(24)  | 5001(2)    | 1983(2)    | 6355.6(10) | 18.4(4)   |
| C(19)  | 6985(2)    | 1025(2)    | 5899.0(10) | 16.6(5)   |
| C(8)   | 6605(2)    | 3029(2)    | 8363.7(10) | 18.4(5)   |
| C(21)  | 7390(2)    | -909(2)    | 5351.9(11) | 21.7(5)   |
| C(17)  | 8583(2)    | -455(2)    | 6265.4(11) | 21.9(5)   |
| C(4)   | 7416(2)    | 4200(2)    | 8250.9(11) | 17.5(5)   |
| C(2)   | 8269(2)    | 5726(2)    | 7531.4(11) | 20.3(5)   |
| C(20)  | 6719(2)    | 226(2)     | 5405.1(10) | 19.6(5)   |
| C(18)  | 7919(2)    | 678(2)     | 6318.1(11) | 19.7(5)   |
| C(16)  | 8299(2)    | -1237(2)   | 5778.9(11) | 21.6(5)   |
| C(5)   | 7898(2)    | 4929(2)    | 8731.7(11) | 18.7(5)   |
| C(3)   | 7616(2)    | 4607(2)    | 7658.1(11) | 19.3(5)   |
| C(23)  | 6233(2)    | 2244(2)    | 6001.1(10) | 17.3(4)   |
| C(1)   | 8709(2)    | 6446(2)    | 8011.1(11) | 19.1(5)   |
| C(9)   | 5170(2)    | 3361(2)    | 8367.2(11) | 19.0(5)   |
| C(30)  | 5732(2)    | 566(3)     | 4935.1(11) | 24.2(5)   |
| C(29)  | 7891(2)    | 3776(2)    | 5993.1(11) | 21.9(5)   |
| C(6)   | 8544(2)    | 6056(2)    | 8604.5(11) | 19.8(5)   |
| C(25)  | 4167(2)    | 3162(2)    | 6413.4(12) | 24.2(5)   |
| C(14)  | 7780(3)    | 1214(3)    | 8044.5(12) | 26.5(6)   |
| C(10)  | 4315(2)    | 2212(2)    | 8454.9(11) | 24.0(5)   |
| C(15)  | 7776(3)    | 4519(3)    | 9384.4(11) | 26.4(5)   |



Table 3. Bond lengths [ $\text{\AA}$ ] and angles [ $^\circ$ ] for **12**.

---

|                   |            |
|-------------------|------------|
| Br(7)-C(1)        | 1.904(2)   |
| Br(22)-C(16)      | 1.904(2)   |
| Cl(26)-C(25)      | 1.793(3)   |
| Cl(11)-C(10)      | 1.793(3)   |
| O(28)-C(23)       | 1.425(3)   |
| O(28)-C(29)       | 1.426(3)   |
| O(27)-C(24)       | 1.421(3)   |
| O(13)-C(8)        | 1.426(3)   |
| O(13)-C(14)       | 1.417(3)   |
| O(12)-C(19)       | 1.418(3)   |
| C(24)-C(23)       | 1.533(3)   |
| C(24)-C(25)       | 1.522(4)   |
| C(19)-C(20)       | 1.406(3)   |
| C(19)-C(18)       | 1.395(3)   |
| C(19)-C(23)       | 1.520(3)   |
| C(8)-C(4)         | 1.516(3)   |
| C(8)-C(9)         | 1.541(3)   |
| C(21)-C(20)       | 1.390(4)   |
| C(21)-C(16)       | 1.383(4)   |
| C(17)-C(18)       | 1.385(4)   |
| C(17)-C(16)       | 1.386(4)   |
| C(4)-C(5)         | 1.404(3)   |
| C(4)-C(3)         | 1.394(3)   |
| C(2)-C(3)         | 1.390(4)   |
| C(2)-C(1)         | 1.381(3)   |
| C(20)-C(30)       | 1.507(3)   |
| C(5)-C(6)         | 1.393(4)   |
| C(5)-C(15)        | 1.511(3)   |
| C(1)-C(6)         | 1.385(3)   |
| C(9)-C(10)        | 1.516(3)   |
| C(23)-O(28)-C(29) | 112.24(18) |
| C(14)-O(13)-C(8)  | 113.45(18) |
| O(27)-C(24)-C(23) | 111.96(18) |
| O(27)-C(24)-C(25) | 109.91(19) |
| C(25)-C(24)-C(23) | 112.3(2)   |
| C(20)-C(19)-C(23) | 121.1(2)   |

|                    |            |
|--------------------|------------|
| C(18)-C(19)-C(20)  | 119.8(2)   |
| C(18)-C(19)-C(23)  | 119.0(2)   |
| O(13)-C(8)-C(4)    | 112.10(18) |
| O(13)-C(8)-C(9)    | 106.91(18) |
| C(4)-C(8)-C(9)     | 111.2(2)   |
| C(16)-C(21)-C(20)  | 120.2(2)   |
| C(18)-C(17)-C(16)  | 117.9(2)   |
| C(5)-C(4)-C(8)     | 121.3(2)   |
| C(3)-C(4)-C(8)     | 119.2(2)   |
| C(3)-C(4)-C(5)     | 119.3(2)   |
| C(1)-C(2)-C(3)     | 118.2(2)   |
| C(19)-C(20)-C(30)  | 121.9(2)   |
| C(21)-C(20)-C(19)  | 118.7(2)   |
| C(21)-C(20)-C(30)  | 119.4(2)   |
| C(17)-C(18)-C(19)  | 121.4(2)   |
| C(21)-C(16)-Br(22) | 119.46(19) |
| C(21)-C(16)-C(17)  | 121.9(2)   |
| C(17)-C(16)-Br(22) | 118.60(19) |
| C(4)-C(5)-C(15)    | 122.4(2)   |
| C(6)-C(5)-C(4)     | 119.1(2)   |
| C(6)-C(5)-C(15)    | 118.5(2)   |
| C(2)-C(3)-C(4)     | 121.6(2)   |
| O(28)-C(23)-C(24)  | 106.38(18) |
| O(28)-C(23)-C(19)  | 111.98(18) |
| C(19)-C(23)-C(24)  | 111.1(2)   |
| C(2)-C(1)-Br(7)    | 119.28(18) |
| C(2)-C(1)-C(6)     | 121.5(2)   |
| C(6)-C(1)-Br(7)    | 119.17(18) |
| O(12)-C(9)-C(8)    | 110.83(19) |
| O(12)-C(9)-C(10)   | 105.26(19) |
| C(10)-C(9)-C(8)    | 113.2(2)   |
| C(1)-C(6)-C(5)     | 120.2(2)   |
| C(24)-C(25)-Cl(26) | 109.11     |
| C(9)-C(10)-Cl(11)  | 111.43(17) |

---

Symmetry transformations used to generate equivalent atoms:

Table 4. Anisotropic displacement parameters ( $\text{\AA}^2 \times 10^3$ ) for **12**. The anisotropic displacement factor exponent takes the form:  $-2^{-2} [h^2 a^* 2U^{11} + \dots + 2 h k a^* b^* U^{12}]$ .

|        | U <sup>11</sup> | U <sup>22</sup> | U <sup>33</sup> | U <sup>23</sup> | U <sup>13</sup> | U <sup>12</sup> |
|--------|-----------------|-----------------|-----------------|-----------------|-----------------|-----------------|
| Br(7)  | 24.20(12)       | 21.43(13)       | 33.21(13)       | 2.67(11)        | -2.97(10)       | -5.06(10)       |
| Br(22) | 31.24(14)       | 20.80(13)       | 40.81(15)       | -0.30(12)       | 9.42(12)        | 3.41(11)        |
| Cl(26) | 28.0(3)         | 33.2(3)         | 40.4(3)         | 6.8(3)          | -13.3(3)        | 2.7(3)          |
| Cl(11) | 34.6(3)         | 26.4(3)         | 37.1(3)         | 6.6(3)          | 9.0(3)          | -3.9(3)         |
| O(28)  | 18.0(8)         | 18.5(8)         | 18.4(7)         | -0.6(7)         | -0.6(6)         | -6.3(7)         |
| O(27)  | 20.2(8)         | 18.8(8)         | 18.0(7)         | 0.1(6)          | -0.6(6)         | -4.0(7)         |
| O(13)  | 21.1(8)         | 17.0(8)         | 21.5(7)         | -4.7(7)         | 1.0(6)          | 5.2(7)          |
| O(12)  | 22.1(9)         | 21.5(8)         | 23.5(8)         | -2.0(7)         | -2.3(7)         | 1.5(7)          |
| C(24)  | 17.0(10)        | 18.6(11)        | 19.7(10)        | 0.1(9)          | -2.4(8)         | -3.2(9)         |
| C(19)  | 15.9(11)        | 18.0(11)        | 15.9(10)        | 0.7(9)          | 2.3(8)          | -2.8(9)         |
| C(8)   | 19.1(11)        | 19.1(12)        | 17.0(10)        | -4.2(9)         | 1.4(8)          | 1.4(10)         |
| C(21)  | 23.5(12)        | 20.9(12)        | 20.6(12)        | -4.8(9)         | 5.9(10)         | -7.2(10)        |
| C(17)  | 18.8(12)        | 23.7(13)        | 23.1(12)        | 4.8(10)         | -0.9(9)         | -1.1(10)        |
| C(4)   | 14.1(10)        | 19.1(12)        | 19.2(11)        | -1.6(9)         | 0.8(9)          | 3.4(9)          |
| C(2)   | 18.6(11)        | 23.4(12)        | 18.8(11)        | 0.9(9)          | -0.8(9)         | 1.2(10)         |
| C(20)  | 17.6(11)        | 23.8(12)        | 17.4(11)        | 0.1(9)          | 2.8(9)          | -7.4(10)        |
| C(18)  | 20.9(12)        | 21.0(12)        | 17.2(11)        | 0.2(9)          | -0.9(9)         | -4.8(10)        |
| C(16)  | 21.0(11)        | 17.8(11)        | 26.0(12)        | 0.1(10)         | 8.1(10)         | -1.5(9)         |
| C(5)   | 16.2(11)        | 22.8(12)        | 16.9(11)        | -2.9(9)         | 1.0(9)          | 2.7(9)          |
| C(3)   | 19.4(11)        | 21.4(12)        | 17.2(11)        | -3.0(9)         | -0.8(9)         | 0.1(10)         |
| C(23)  | 18.7(10)        | 17.7(11)        | 15.4(9)         | -0.3(9)         | -2.7(8)         | -2.1(9)         |
| C(1)   | 13.2(10)        | 18.3(12)        | 25.9(12)        | 0.4(9)          | 0.8(9)          | 1.5(9)          |
| C(9)   | 18.5(11)        | 19.2(12)        | 19.3(10)        | -4.1(9)         | 1.7(9)          | 1.3(9)          |
| C(30)  | 21.3(12)        | 31.1(14)        | 20.4(11)        | -3.6(10)        | -1.8(10)        | -6.2(10)        |
| C(29)  | 21.6(12)        | 21.6(13)        | 22.5(12)        | 3.5(10)         | 0.2(10)         | -7.1(10)        |
| C(6)   | 15.6(11)        | 22.9(12)        | 20.9(11)        | -6.1(9)         | -1.9(9)         | 1.7(9)          |
| C(25)  | 19.2(11)        | 23.1(13)        | 30.1(12)        | 1.1(10)         | -2.7(10)        | -0.8(10)        |
| C(14)  | 27.5(14)        | 23.4(13)        | 28.6(13)        | 2.7(11)         | 3.6(11)         | 10.5(11)        |
| C(10)  | 22.2(12)        | 21.6(12)        | 28.3(12)        | -4.8(10)        | 6.0(9)          | -1.1(11)        |
| C(15)  | 30.8(14)        | 31.0(14)        | 17.5(11)        | -1.8(10)        | 1.3(10)         | -4.2(11)        |

Table 5. Hydrogen coordinates ( $\times 10^4$ ) and isotropic displacement parameters ( $\text{\AA}^2 \times 10^3$ ) for **12**.

|        | x    | y     | z    | U(eq) |
|--------|------|-------|------|-------|
| H(27)  | 5680 | 1978  | 7135 | 28    |
| H(12)  | 4716 | 4666  | 7842 | 34    |
| H(24)  | 4512 | 1346  | 6129 | 22    |
| H(8)   | 6835 | 2667  | 8758 | 22    |
| H(21)  | 7227 | -1450 | 5028 | 26    |
| H(17)  | 9202 | -684  | 6548 | 26    |
| H(2)   | 8405 | 5985  | 7134 | 24    |
| H(18)  | 8099 | 1219  | 6640 | 24    |
| H(3)   | 7306 | 4117  | 7340 | 23    |
| H(23)  | 6013 | 2617  | 5608 | 21    |
| H(9)   | 5003 | 3977  | 8691 | 23    |
| H(30A) | 4893 | 489   | 5107 | 36    |
| H(30B) | 5809 | 0     | 4596 | 36    |
| H(30C) | 5865 | 1425  | 4803 | 36    |
| H(29A) | 7486 | 4267  | 5681 | 33    |
| H(29B) | 8445 | 3154  | 5813 | 33    |
| H(29C) | 8383 | 4329  | 6248 | 33    |
| H(6)   | 8866 | 6548  | 8919 | 24    |
| H(25A) | 4674 | 3869  | 6561 | 29    |
| H(25B) | 3483 | 3006  | 6700 | 29    |
| H(14A) | 7845 | 596   | 7726 | 40    |
| H(14B) | 7594 | 790   | 8419 | 40    |
| H(14C) | 8574 | 1665  | 8080 | 40    |
| H(10A) | 4444 | 1621  | 8123 | 29    |
| H(10B) | 3427 | 2479  | 8449 | 29    |
| H(15A) | 6898 | 4325  | 9472 | 40    |
| H(15B) | 8060 | 5194  | 9644 | 40    |
| H(15C) | 8291 | 3777  | 9452 | 40    |

Table 6. Torsion angles [°] for **12**.

---

|                          |             |
|--------------------------|-------------|
| Br(7)-C(1)-C(6)-C(5)     | 178.70(18)  |
| O(27)-C(24)-C(23)-O(28)  | -60.9(2)    |
| O(27)-C(24)-C(23)-C(19)  | 61.2(2)     |
| O(27)-C(24)-C(25)-Cl(26) | -164.65(15) |
| O(13)-C(8)-C(4)-C(5)     | -147.9(2)   |
| O(13)-C(8)-C(4)-C(3)     | 36.3(3)     |
| O(13)-C(8)-C(9)-O(12)    | -62.8(2)    |
| O(13)-C(8)-C(9)-C(10)    | 55.2(2)     |
| O(12)-C(9)-C(10)-Cl(11)  | -179.18(15) |
| C(8)-C(4)-C(5)-C(6)      | -174.5(2)   |
| C(8)-C(4)-C(5)-C(15)     | 7.2(4)      |
| C(8)-C(4)-C(3)-C(2)      | 175.0(2)    |
| C(8)-C(9)-C(10)-Cl(11)   | 59.6(2)     |
| C(4)-C(8)-C(9)-O(12)     | 59.8(2)     |
| C(4)-C(8)-C(9)-C(10)     | 177.82(19)  |
| C(4)-C(5)-C(6)-C(1)      | -0.2(4)     |
| C(2)-C(1)-C(6)-C(5)      | -1.4(4)     |
| C(20)-C(19)-C(18)-C(17)  | -1.1(4)     |
| C(20)-C(19)-C(23)-O(28)  | -155.7(2)   |
| C(20)-C(19)-C(23)-C(24)  | 85.5 (3)    |
| C(20)-C(21)-C(16)-Br(22) | 178.19(17)  |
| C(20)-C(21)-C(16)-C(17)  | -0.7(4)     |
| C(18)-C(19)-C(20)-C(21)  | 0.8(3)      |
| C(18)-C(19)-C(20)-C(30)  | -179.2(2)   |
| C(18)-C(19)-C(23)-O(28)  | 26.8(3)     |
| C(18)-C(19)-C(23)-C(24)  | -92.0(2)    |
| C(18)-C(17)-C(16)-Br(22) | -178.40(18) |
| C(18)-C(17)-C(16)-C(21)  | 0.5(4)      |
| C(16)-C(21)-C(20)-C(19)  | 0.0(3)      |
| C(16)-C(21)-C(20)-C(30)  | 180.0(2)    |
| C(16)-C(17)-C(18)-C(19)  | 0.4(4)      |
| C(5)-C(4)-C(3)-C(2)      | -0.8(4)     |
| C(3)-C(4)-C(5)-C(6)      | 1.3(4)      |
| C(3)-C(4)-C(5)-C(15)     | -177.0(2)   |
| C(3)-C(2)-C(1)-Br(7)     | -178.28(18) |
| C(3)-C(2)-C(1)-C(6)      | 1.8(4)      |

|                          |             |
|--------------------------|-------------|
| C(23)-C(24)-C(25)-Cl(26) | 70.0(2)     |
| C(23)-C(19)-C(20)-C(21)  | -176.6(2)   |
| C(23)-C(19)-C(20)-C(30)  | 3.4(3)      |
| C(23)-C(19)-C(18)-C(17)  | 176.5(2)    |
| C(1)-C(2)-C(3)-C(4)      | -0.7(4)     |
| C(9)-C(8)-C(4)-C(5)      | 92.5(3)     |
| C(9)-C(8)-C(4)-C(3)      | -83.3(3)    |
| C(29)-O(28)-C(23)-C(24)  | -161.54(19) |
| C(29)-O(28)-C(23)-C(19)  | 76.9(2)     |
| C(25)-C(24)-C(23)-O(28)  | 63.3(2)     |
| C(25)-C(24)-C(23)-C(19)  | -174.59(19) |
| C(14)-O(13)-C(8)-C(4)    | 89.9(2)     |
| C(14)-O(13)-C(8)-C(9)    | -148.0(2)   |
| C(15)-C(5)-C(6)-C(1)     | 178.2(2)    |

---

Symmetry transformations used to generate equivalent atoms:

Table 7. Hydrogen bonds for **12** [ $\text{\AA}$  and  $^\circ$ ].

---

| D-H...A | d(D-H) | d(H...A) | d(D...A) | $\angle(\text{DHA})$ |
|---------|--------|----------|----------|----------------------|
|---------|--------|----------|----------|----------------------|

---

## The determination of enantiomeric excess

**Table 2, entry 1**

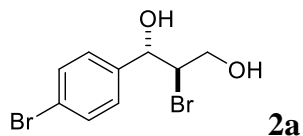

**HPLC Condition:** **Column:** Chiralpak AS-H, Daicel Chemical Industries, Ltd.;  
**Eluent:** Hexanes/IPA (90/10); **Flow rate:** 1.0 mL/min; **Detection:** UV203 nm.

**Racemic standard**

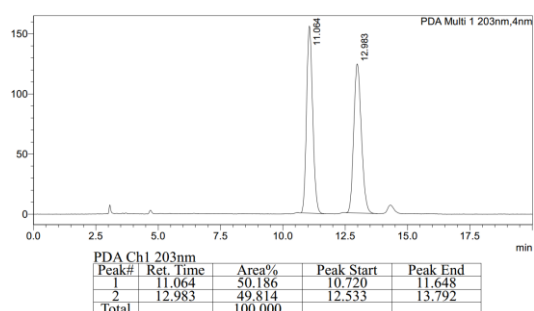

**Enantio-enriched product**

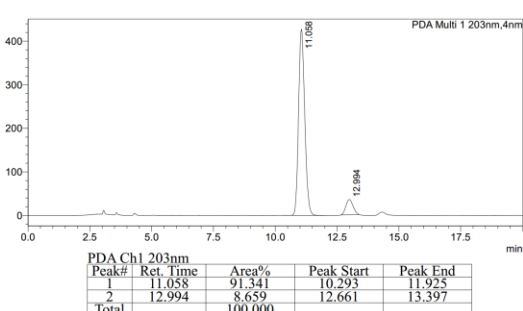

**Table 2, entry 2**

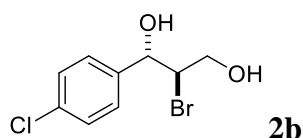

**HPLC Condition:** **Column:** Chiralpak AS-H, Daicel Chemical Industries, Ltd.;  
**Eluent:** Hexanes/IPA (90/10); **Flow rate:** 1.0 mL/min; **Detection:** UV202 nm.

**Racemic standard**

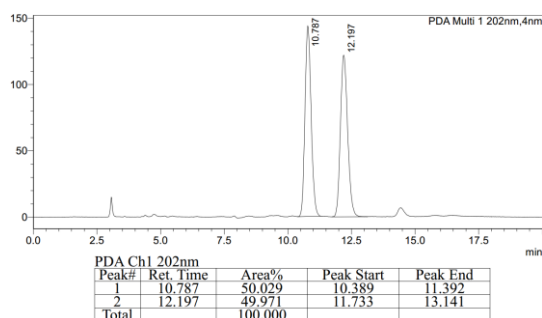

**Enantio-enriched product**

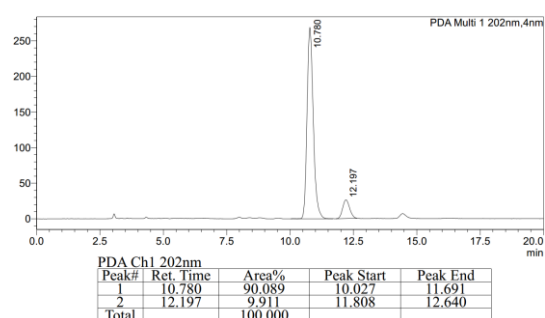



**Table 2, entry 3**

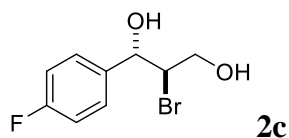

**HPLC Condition:** **Column:** Chiralpak AD-H, Daicel Chemical Industries, Ltd.;  
**Eluent:** Hexanes/IPA (90/10); **Flow rate:** 1.0 mL/min; **Detection:** UV208 nm.

**Racemic standard**

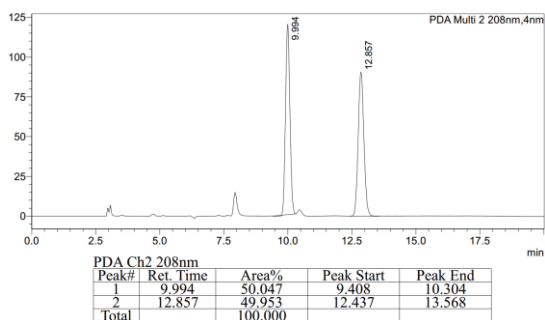

**Enantio-enriched product**

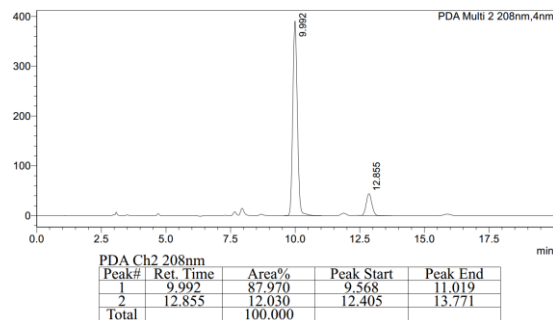

**Table 2, entry 4**

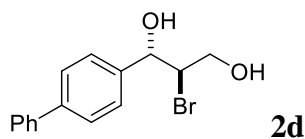

**HPLC Condition:** **Column:** Chiralpak AS-H, Daicel Chemical Industries, Ltd.;  
**Eluent:** Hexanes/IPA (90/10); **Flow rate:** 1.0 mL/min; **Detection:** UV207 nm.

**Racemic standard**

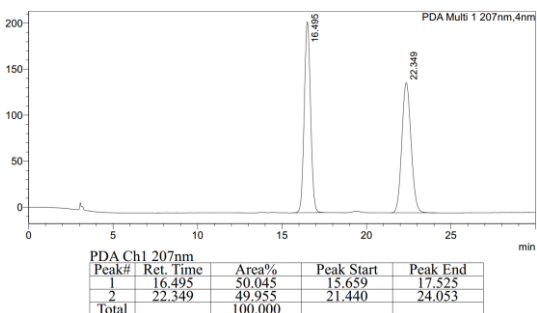

**Enantio-enriched product**

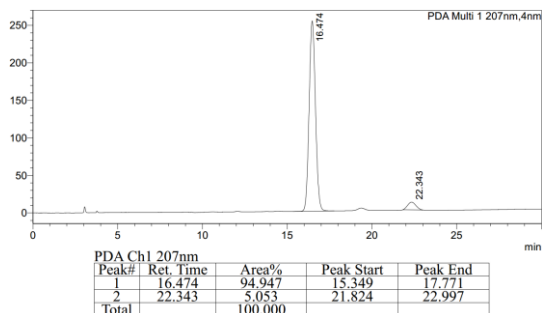

**Table 2, entry 5**

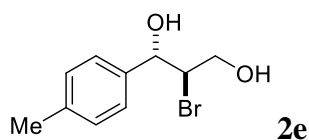

**HPLC Condition:** **Column:** Chiralpak AS-H, Daicel Chemical Industries, Ltd.;  
**Eluent:** Hexanes/IPA (90/10); **Flow rate:** 1.0 mL/min; **Detection:** UV203 nm.

**Racemic standard**

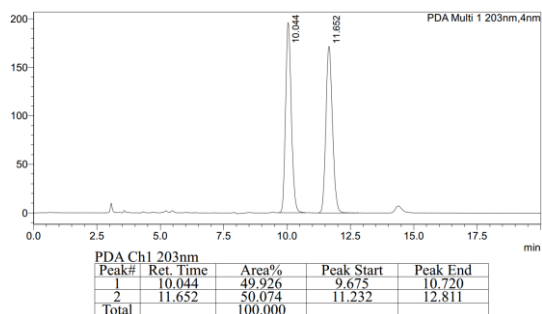

**Enantio-enriched product**

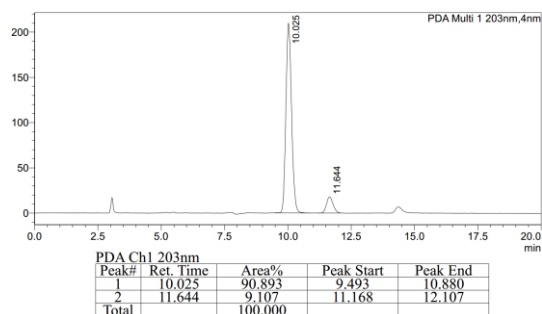

**Table 2, entry 6**

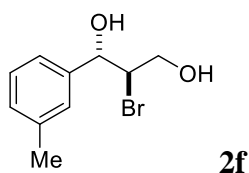

**HPLC Condition:** **Column:** Chiralpak AS-H, Daicel Chemical Industries, Ltd.;  
**Eluent:** Hexanes/IPA (90/10); **Flow rate:** 1.0 mL/min; **Detection:** UV195 nm.

**Racemic standard**

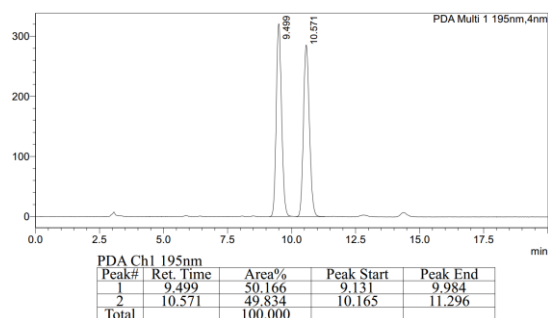

**Enantio-enriched product**

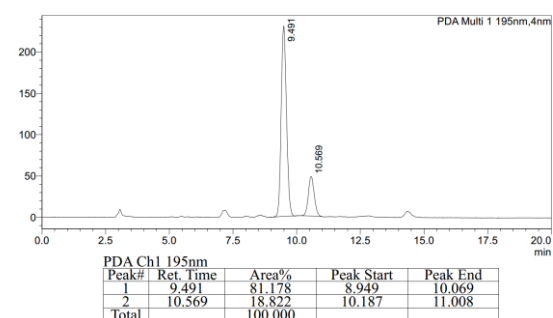

**Table 2, entry 7**

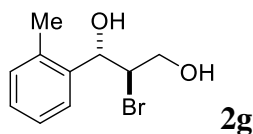

**HPLC Condition:** **Column:** Chiralpak AS-H, Daicel Chemical Industries, Ltd.;  
**Eluent:** Hexanes/IPA (90/10); **Flow rate:** 1.0 mL/min; **Detection:** UV195 nm.

**Racemic standard**

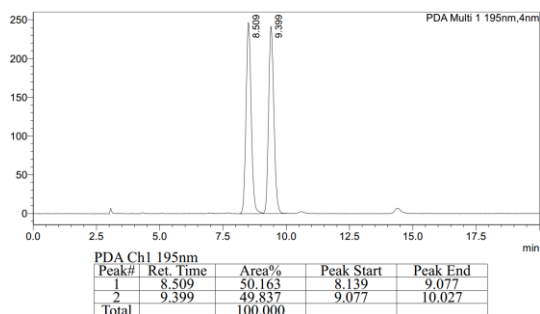

**Enantio-enriched product**

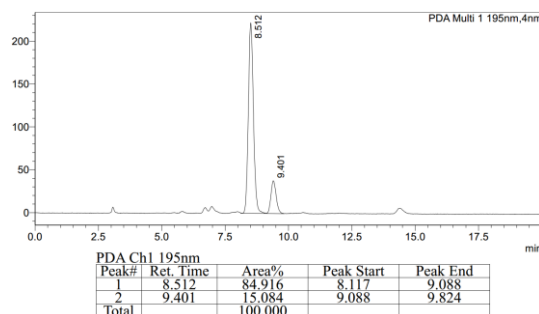

**Table 2, entry 8**

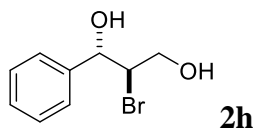

**HPLC Condition:** **Column:** Chiralpak AS-H, Daicel Chemical Industries, Ltd.;  
**Eluent:** Hexanes/IPA (90/10); **Flow rate:** 1.0 mL/min; **Detection:** UV194 nm.

**Racemic standard**

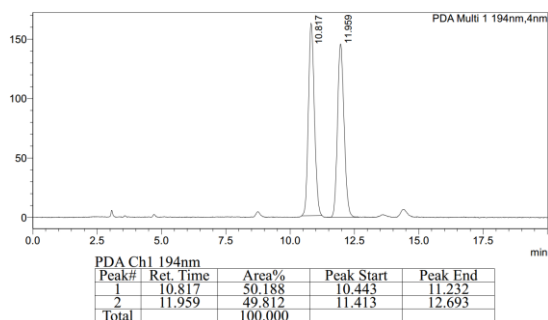

**Enantio-enriched product**

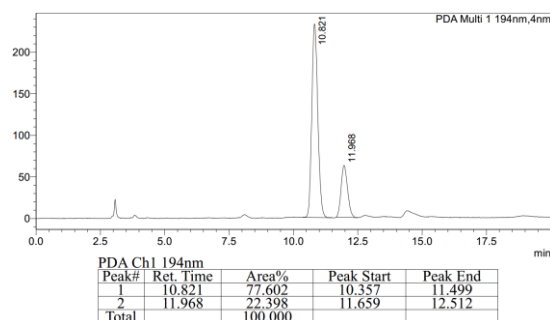

**Table 2, entry 9**

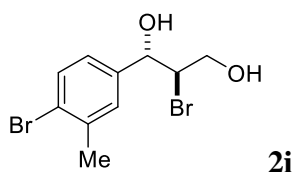

**HPLC Condition:** **Column:** Chiralpak AD-H, Daicel Chemical Industries, Ltd.;  
**Eluent:** Hexanes/IPA (90/10); **Flow rate:** 1.0 mL/min; **Detection:** UV205 nm.  
**Racemic standard** **Enantio-enriched product**

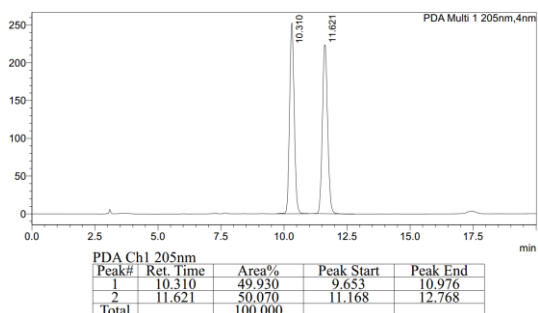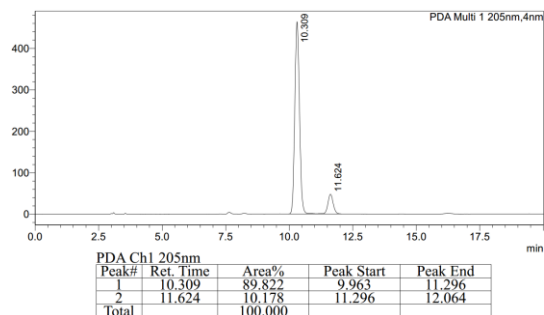

**Table 2, entry 10**

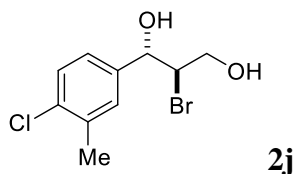

**HPLC Condition:** **Column:** Chiralpak AD-H, Daicel Chemical Industries, Ltd.;  
**Eluent:** Hexanes/IPA (90/10); **Flow rate:** 1.0 mL/min; **Detection:** UV204 nm.  
**Racemic standard** **Enantio-enriched product**

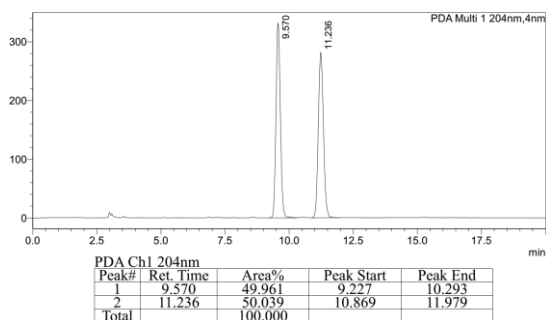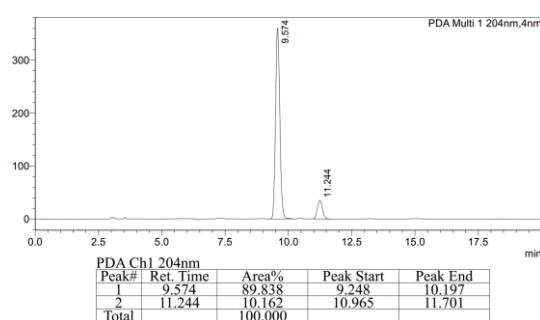

**Table 2, entry 11**

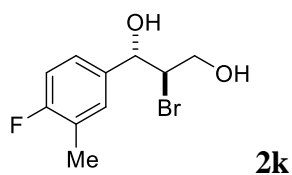

**HPLC Condition:** Column: Chiralpak AD-H, Daicel Chemical Industries, Ltd.;  
**Eluent:** Hexanes/IPA (90/10); **Flow rate:** 1.0 mL/min; **Detection:** UV191 nm.

**Racemic standard**

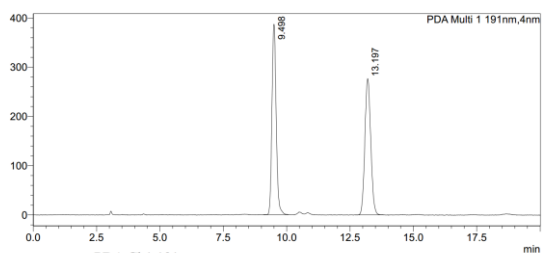

| Peak# | Ret. Time | Area%   | Peak Start | Peak End |
|-------|-----------|---------|------------|----------|
| 1     | 9.498     | 50.184  | 9.077      | 10.069   |
| 2     | 13.197    | 49.816  | 12.693     | 13.845   |
| Total |           | 100.000 |            |          |

**Enantio-enriched product**

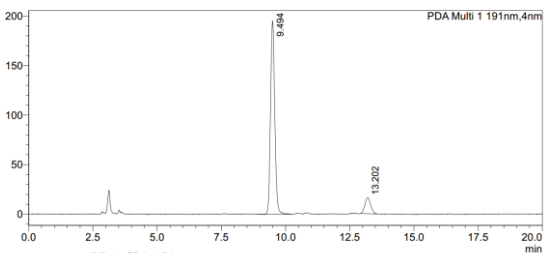

| Peak# | Ret. Time | Area%   | Peak Start | Peak End |
|-------|-----------|---------|------------|----------|
| 1     | 9.494     | 89.855  | 8.960      | 10.208   |
| 2     | 13.202    | 10.145  | 12.928     | 13.557   |
| Total |           | 100.000 |            |          |

**Table 2, entry 12**

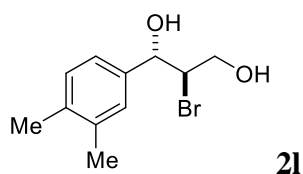

**HPLC Condition:** Column: Chiralpak AD-H, Daicel Chemical Industries, Ltd.;  
**Eluent:** Hexanes/IPA (90/10); **Flow rate:** 1.0 mL/min; **Detection:** UV204 nm.

**Racemic standard**

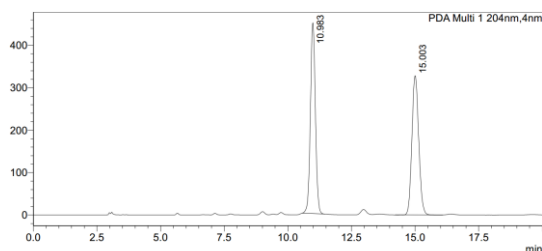

| Peak# | Ret. Time | Area%   | Peak Start | Peak End |
|-------|-----------|---------|------------|----------|
| 1     | 10.983    | 50.057  | 10.560     | 11.445   |
| 2     | 15.003    | 49.943  | 14.219     | 16.085   |
| Total |           | 100.000 |            |          |

**Enantio-enriched product**

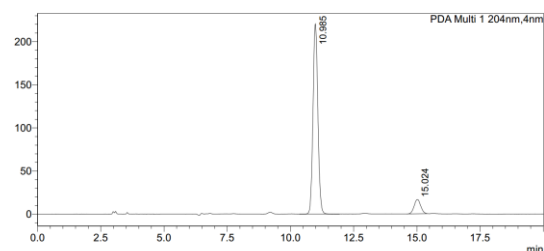

| Peak# | Ret. Time | Area%   | Peak Start | Peak End |
|-------|-----------|---------|------------|----------|
| 1     | 10.985    | 90.856  | 10.357     | 11.936   |
| 2     | 15.024    | 9.144   | 14.603     | 15.403   |
| Total |           | 100.000 |            |          |

**Table 2, entry 13**

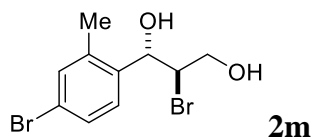

**HPLC Condition:** Column: Chiralpak AD-H, Daicel Chemical Industries, Ltd.;  
**Eluent:** Hexanes/IPA (90/10); **Flow rate:** 1.0 mL/min; **Detection:** UV205 nm.

**Racemic standard**

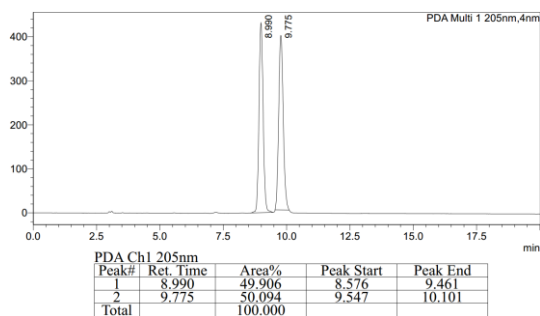

**Enantio-enriched product**

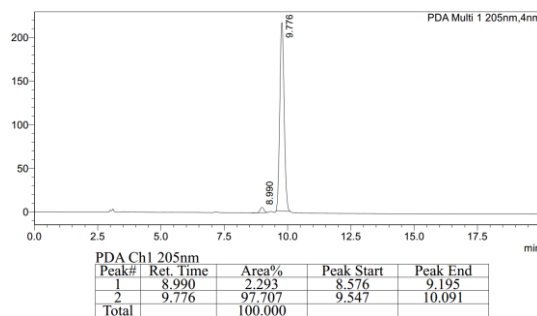

**Table 2, entry 14**

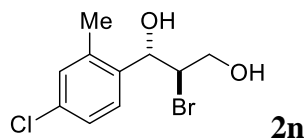

**HPLC Condition:** Column: Chiralpak AS-H, Daicel Chemical Industries, Ltd.;  
**Eluent:** Hexanes/IPA (90/10); **Flow rate:** 1.0 mL/min; **Detection:** UV204 nm.

**Racemic standard**

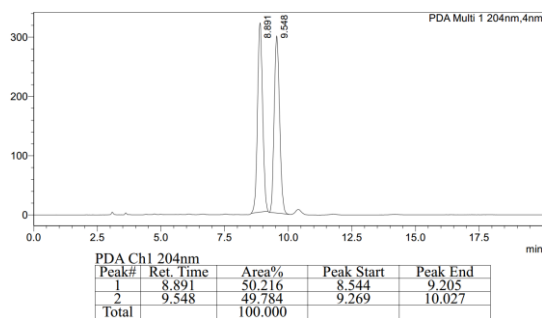

**Enantio-enriched product**

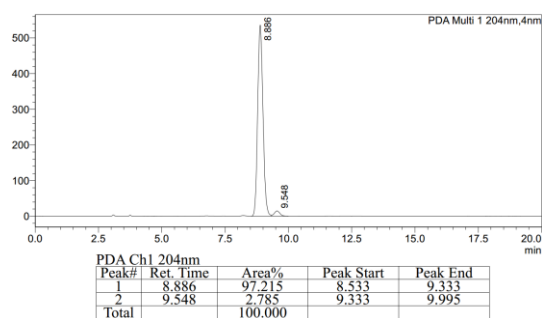

**Table 2, entry 15**

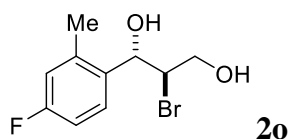

**HPLC Condition:** Column: Chiralpak OD-H, Daicel Chemical Industries, Ltd.;  
**Eluent:** Hexanes/IPA (90/10); **Flow rate:** 1.0 mL/min; **Detection:** UV193 nm.

**Racemic standard**

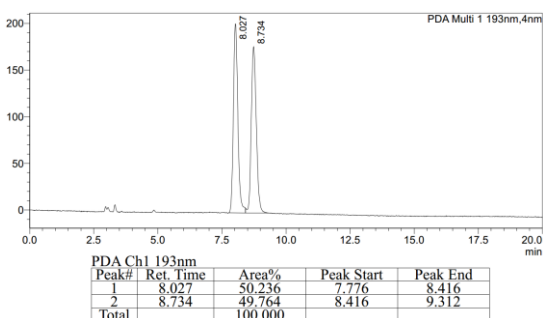

**Enantio-enriched product**

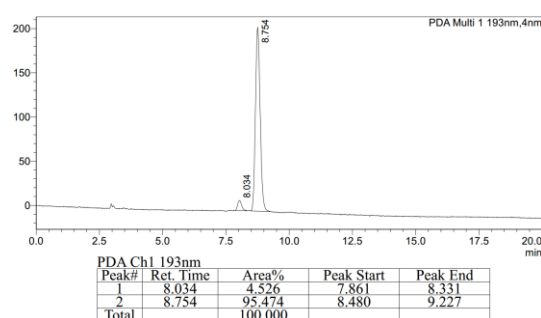

**Table 2, entry 16**

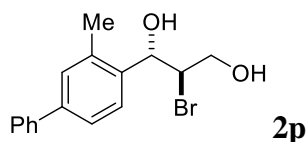

**HPLC Condition:** Column: Chiralpak AS-H, Daicel Chemical Industries, Ltd.;  
**Eluent:** Hexanes/IPA (90/10); **Flow rate:** 1.0 mL/min; **Detection:** UV207 nm.

**Racemic standard**

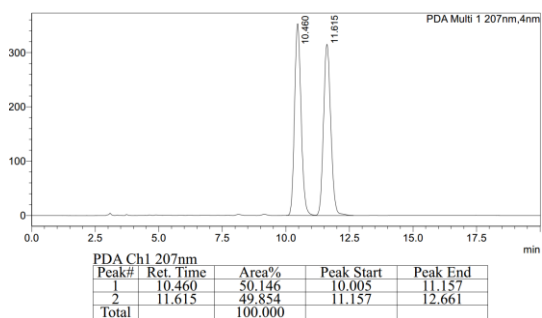

**Enantio-enriched product**

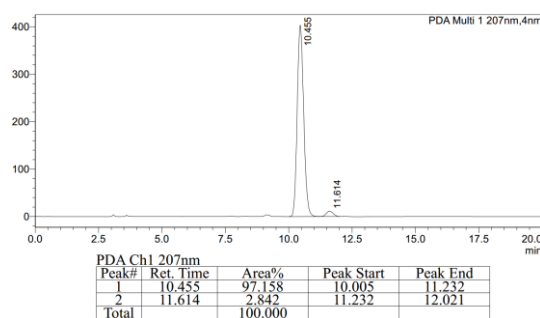

**Table 2, entry 17**

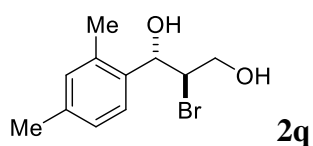

**HPLC Condition:** Column: Chiralpak AS-H, Daicel Chemical Industries, Ltd.;  
**Eluent:** Hexanes/IPA (95/5); **Flow rate:** 1.0 mL/min; **Detection:** UV204 nm.

**Racemic standard**

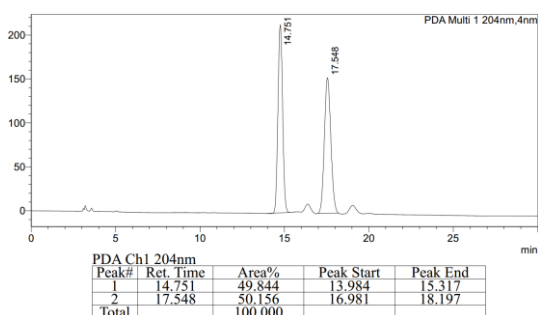

**Enantio-enriched product**

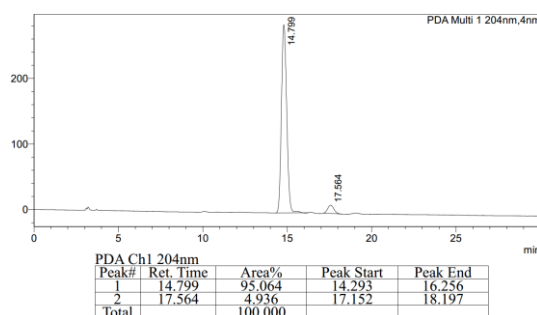

**Table 2, entry 18**

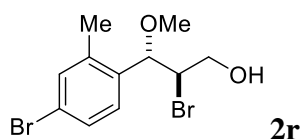

**HPLC Condition:** Column: Chiralpak AS-H, Daicel Chemical Industries, Ltd.;  
**Eluent:** Hexanes/IPA (90/10); **Flow rate:** 1.0 mL/min; **Detection:** UV205 nm.

**Racemic standard**

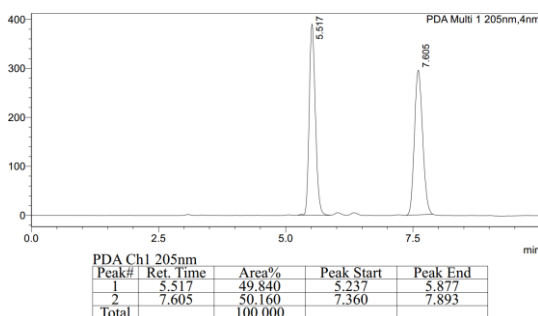

**Enantio-enriched product**

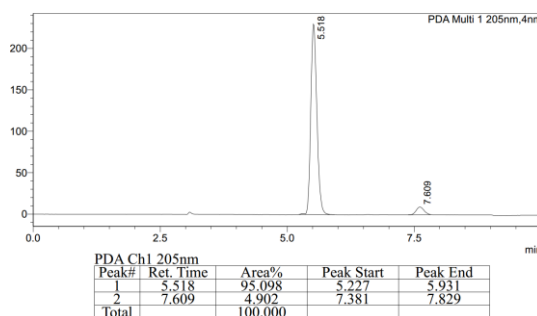



**Table 2, entry 19**

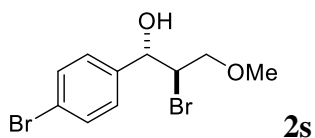

**HPLC Condition:** Column: Chiralpak AS-H, Daicel Chemical Industries, Ltd.;

**Eluent:** Hexanes/IPA (90/10); **Flow rate:** 1.0 mL/min; **Detection:** UV203 nm.

**Racemic standard**

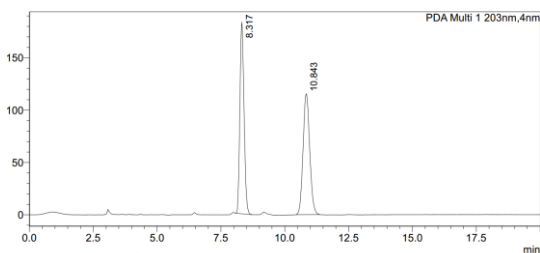

| PDA Ch1 203nm |           |         |            |          |
|---------------|-----------|---------|------------|----------|
| Peak#         | Ret. Time | Area%   | Peak Start | Peak End |
| 1             | 8.317     | 49.807  | 8.075      | 8.725    |
| 2             | 10.843    | 50.193  | 10.443     | 11.371   |
| Total         |           | 100.000 |            |          |

**Enantio-enriched product**

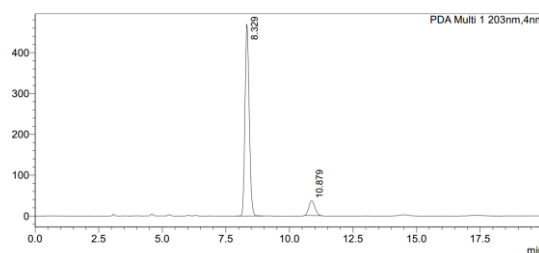

| PDA Ch1 203nm |           |         |            |          |
|---------------|-----------|---------|------------|----------|
| Peak#         | Ret. Time | Area%   | Peak Start | Peak End |
| 1             | 8.329     | 89.965  | 7.872      | 8.960    |
| 2             | 10.879    | 10.035  | 10.603     | 11.285   |
| Total         |           | 100.000 |            |          |

**Scheme 3, epoxide 4**

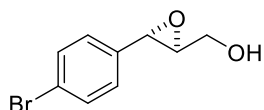

**HPLC Condition:** Column: Chiralpak AS-H, Daicel Chemical Industries, Ltd.;

**Eluent:** Hexanes/IPA (90/10); **Flow rate:** 1.0 mL/min; **Detection:** UV203 nm.

**Racemic standard**

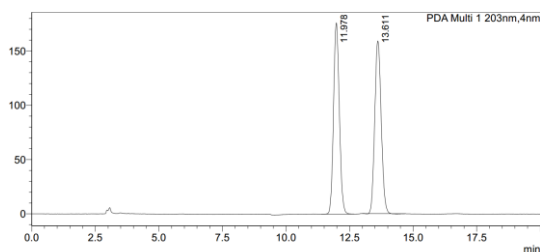

| PDA Ch1 203nm |           |         |            |          |
|---------------|-----------|---------|------------|----------|
| Peak#         | Ret. Time | Area%   | Peak Start | Peak End |
| 1             | 11.978    | 49.867  | 11.381     | 12.683   |
| 2             | 13.611    | 50.133  | 13.003     | 14.709   |
| Total         |           | 100.000 |            |          |

**Enantio-enriched product**

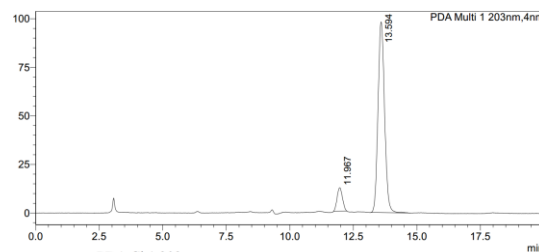

| PDA Ch1 203nm |           |         |            |          |
|---------------|-----------|---------|------------|----------|
| Peak#         | Ret. Time | Area%   | Peak Start | Peak End |
| 1             | 11.967    | 9.141   | 11.723     | 12.245   |
| 2             | 13.594    | 90.859  | 13.184     | 14.752   |
| Total         |           | 100.000 |            |          |

### Scheme 5, acetal 5

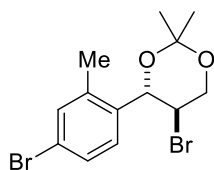

**HPLC Condition: Column:** Chiralpak AD-H, Daicel Chemical Industries, Ltd.;

**Eluent:** Hexanes/IPA (95/5); **Flow rate:** 1.0 mL/min; **Detection:** UV204 nm.

**Racemic standard**

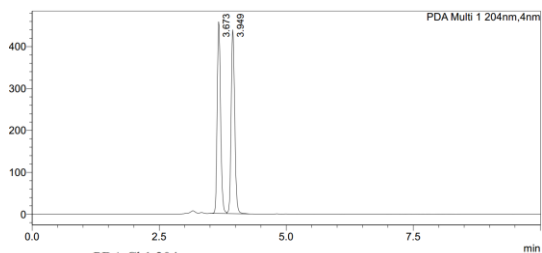

| Peak# | Ret. Time | Area%   | Peak Start | Peak End |
|-------|-----------|---------|------------|----------|
| 1     | 3.673     | 49.926  | 3.499      | 3.829    |
| 2     | 3.949     | 50.074  | 3.829      | 4.277    |
| Total |           | 100.000 |            |          |

**Enantio-enriched product**

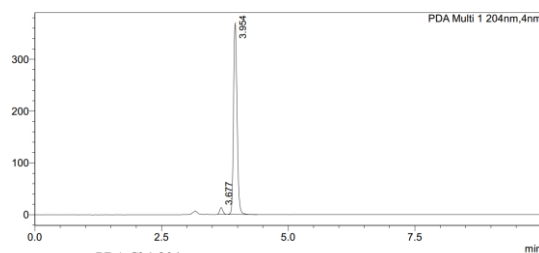

| Peak# | Ret. Time | Area%   | Peak Start | Peak End |
|-------|-----------|---------|------------|----------|
| 1     | 3.677     | 2.996   | 3.605      | 3.776    |
| 2     | 3.954     | 97.004  | 3.808      | 4.395    |
| Total |           | 100.000 |            |          |

### Scheme 5, sulfide 6

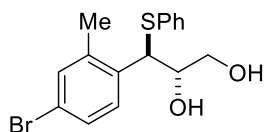

**HPLC Condition: Column:** Chiralpak AD-H, Daicel Chemical Industries, Ltd.;

**Eluent:** Hexanes/IPA (90/10); **Flow rate:** 1.0 mL/min; **Detection:** UV190 nm.

**Racemic standard**

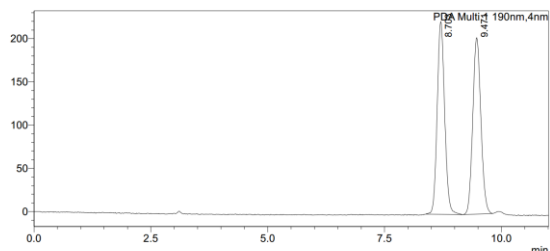

| Peak# | Ret. Time | Area%   | Peak Start | Peak End |
|-------|-----------|---------|------------|----------|
| 1     | 8.703     | 50.086  | 8.384      | 9.163    |
| 2     | 9.471     | 49.914  | 9.163      | 9.803    |
| Total |           | 100.000 |            |          |

**Enantio-enriched product**

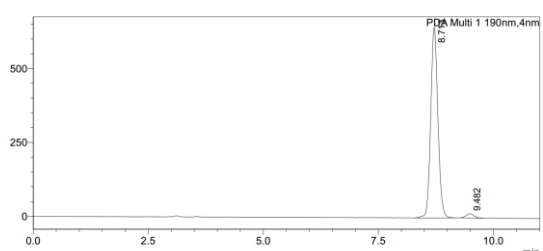

| Peak# | Ret. Time | Area%   | Peak Start | Peak End |
|-------|-----------|---------|------------|----------|
| 1     | 8.713     | 97.680  | 8.288      | 9.216    |
| 2     | 9.482     | 2.320   | 9.269      | 9.781    |
| Total |           | 100.000 |            |          |

### Scheme 6, azide 7

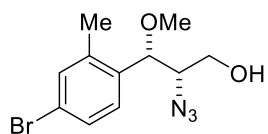

**HPLC Condition:** Column: Chiralpak AS-H, Daicel Chemical Industries, Ltd.;

**Eluent:** Hexanes/IPA (90/10); **Flow rate:** 1.0 mL/min; **Detection:** UV205 nm.

**Racemic standard**

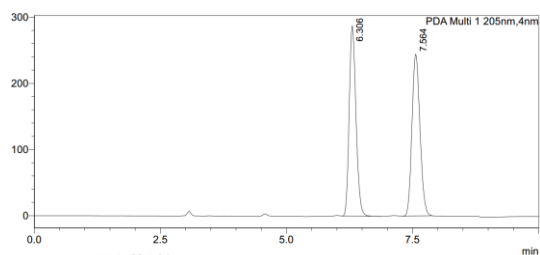

| Peak# | Ret. Time | Area%   | Peak Start | Peak End |
|-------|-----------|---------|------------|----------|
| 1     | 6.306     | 49.828  | 6.101      | 6.869    |
| 2     | 7.564     | 50.172  | 7.307      | 7.893    |
| Total |           | 100.000 |            |          |

**Enantio-enriched product**

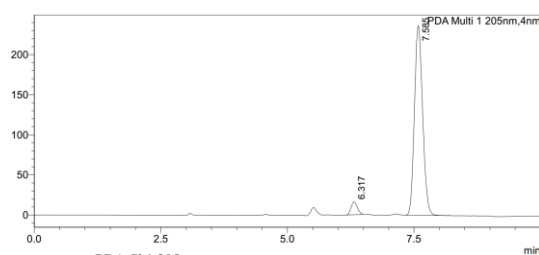

| Peak# | Ret. Time | Area%   | Peak Start | Peak End |
|-------|-----------|---------|------------|----------|
| 1     | 6.317     | 4.985   | 6.165      | 6.507    |
| 2     | 7.585     | 95.015  | 7.339      | 8.203    |
| Total |           | 100.000 |            |          |

### Scheme 6, chloride 8

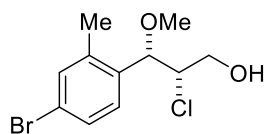

**HPLC Condition:** Column: Chiralpak AS-H, Daicel Chemical Industries, Ltd.;

**Eluent:** Hexanes/IPA (98/2); **Flow rate:** 1.0 mL/min; **Detection:** UV204 nm.

**Racemic standard**

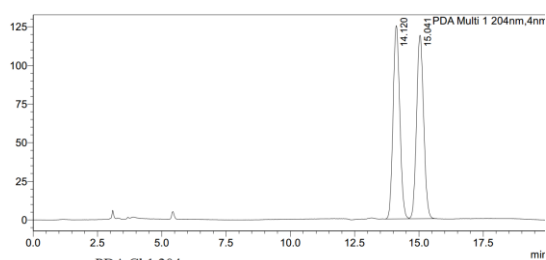

| Peak# | Ret. Time | Area%   | Peak Start | Peak End |
|-------|-----------|---------|------------|----------|
| 1     | 14.120    | 49.998  | 13.696     | 14.624   |
| 2     | 15.041    | 50.002  | 14.624     | 15.701   |
| Total |           | 100.000 |            |          |

**Enantio-enriched product**

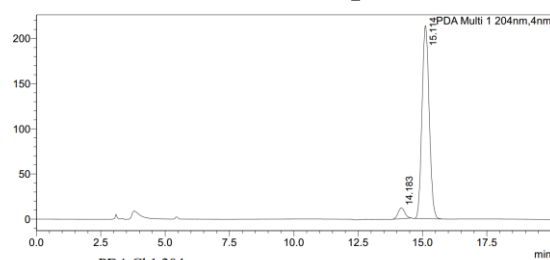

| Peak# | Ret. Time | Area%   | Peak Start | Peak End |
|-------|-----------|---------|------------|----------|
| 1     | 14.183    | 4.958   | 13.856     | 14.581   |
| 2     | 15.114    | 95.042  | 14.699     | 15.744   |
| Total |           | 100.000 |            |          |

### Scheme 6, epoxide 9

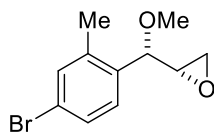

**HPLC Condition:** Column: Chiralpak AS-H, Daicel Chemical Industries, Ltd.;

**Eluent:** Hexanes/IPA (90/10); **Flow rate:** 1.0 mL/min; **Detection:** UV205 nm.

**Racemic standard**

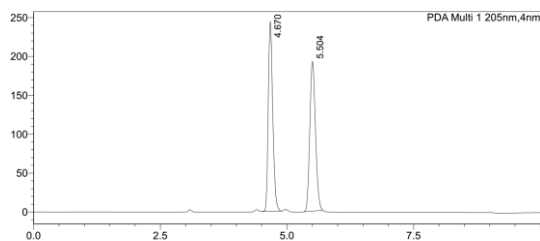

| Peak# | Ret. Time | Area%   | Peak Start | Peak End |
|-------|-----------|---------|------------|----------|
| 1     | 4.670     | 50.054  | 4.512      | 4.896    |
| 2     | 5.504     | 49.946  | 5.333      | 5.707    |
| Total |           | 100.000 |            |          |

**Enantio-enriched product**

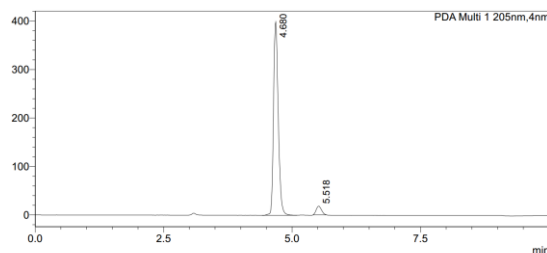

| Peak# | Ret. Time | Area%   | Peak Start | Peak End |
|-------|-----------|---------|------------|----------|
| 1     | 4.680     | 95.129  | 4.416      | 5.099    |
| 2     | 5.518     | 4.871   | 5.408      | 5.675    |
| Total |           | 100.000 |            |          |

### Scheme 6, sulfide 10

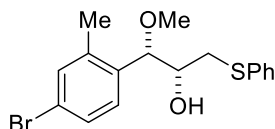

**HPLC Condition:** Column: Chiralpak AS-H, Daicel Chemical Industries, Ltd.;

**Eluent:** Hexanes/IPA (90/10); **Flow rate:** 1.0 mL/min; **Detection:** UV205 nm.

**Racemic standard**

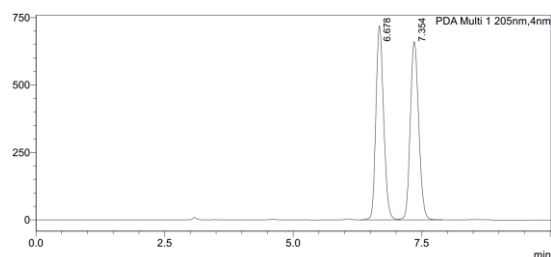

| Peak# | Ret. Time | Area%   | Peak Start | Peak End |
|-------|-----------|---------|------------|----------|
| 1     | 6.678     | 49.823  | 6.304      | 7.040    |
| 2     | 7.354     | 50.177  | 7.040      | 7.904    |
| Total |           | 100.000 |            |          |

**Enantio-enriched product**

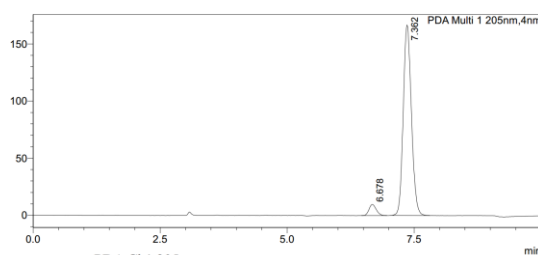

| Peak# | Ret. Time | Area%   | Peak Start | Peak End |
|-------|-----------|---------|------------|----------|
| 1     | 6.678     | 4.883   | 6.464      | 6.965    |
| 2     | 7.362     | 95.117  | 7.029      | 7.808    |
| Total |           | 100.000 |            |          |

### Scheme 7, azide 11

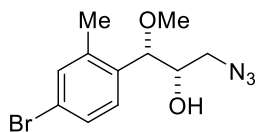

**HPLC Condition:** Column: Chiralpak OD-H, Daicel Chemical Industries, Ltd.;

**Eluent:** Hexanes/IPA (90/10); **Flow rate:** 1.0 mL/min; **Detection:** UV205 nm.

**Racemic standard**

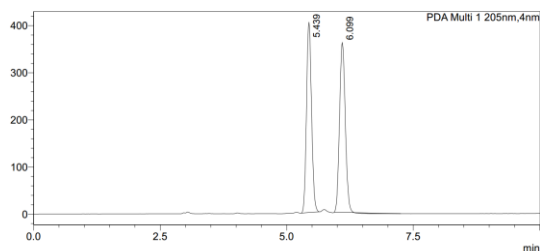

| Peak# | Ret. Time | Area%   | Peak Start | Peak End |
|-------|-----------|---------|------------|----------|
| 1     | 5.439     | 49.841  | 5.291      | 5.653    |
| 2     | 6.099     | 50.159  | 5.941      | 7.253    |
| Total |           | 100.000 |            |          |

**Enantio-enriched product**

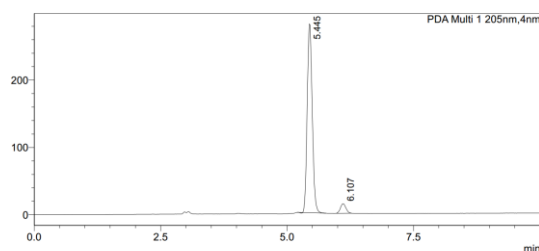

| Peak# | Ret. Time | Area%   | Peak Start | Peak End |
|-------|-----------|---------|------------|----------|
| 1     | 5.445     | 94.823  | 5.205      | 5.771    |
| 2     | 6.107     | 5.177   | 5.973      | 6.272    |
| Total |           | 100.000 |            |          |

### Scheme 7, chloride 12

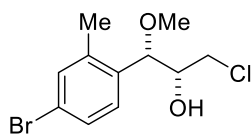

**HPLC Condition:** Column: Chiralpak OD-H, Daicel Chemical Industries, Ltd.;

**Eluent:** Hexanes/IPA (95/5); **Flow rate:** 1.0 mL/min; **Detection:** UV222 nm.

**Racemic standard**

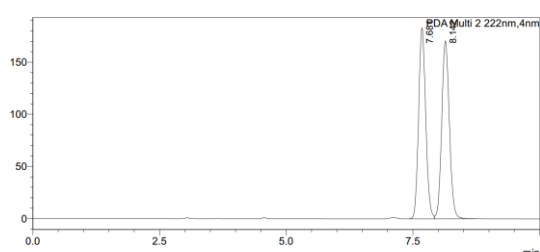

| Peak# | Ret. Time | Area%   | Peak Start | Peak End |
|-------|-----------|---------|------------|----------|
| 1     | 7.681     | 49.960  | 7.424      | 7.925    |
| 2     | 8.142     | 50.040  | 7.925      | 8.736    |
| Total |           | 100.000 |            |          |

**Enantio-enriched product**

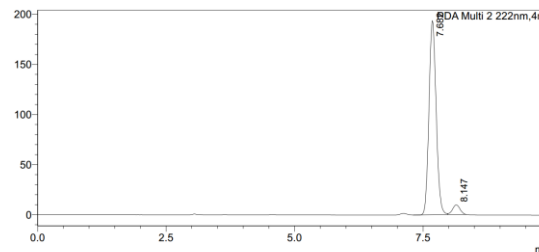

| Peak# | Ret. Time | Area%   | Peak Start | Peak End |
|-------|-----------|---------|------------|----------|
| 1     | 7.682     | 95.051  | 7.307      | 7.979    |
| 2     | 8.147     | 4.949   | 7.979      | 8.341    |
| Total |           | 100.000 |            |          |

7.533  
 7.527  
 7.522  
 7.511  
 7.506  
 7.500  
 7.303  
 7.297  
 7.294  
 7.280  
 7.277  
 7.271  
 7.260  
 5.033  
 5.022  
 5.018  
 5.007  
 4.272  
 4.260  
 4.257  
 4.248  
 4.245  
 4.233  
 4.051  
 4.038  
 4.035  
 4.020  
 4.007  
 4.003  
 3.991  
 3.906  
 3.894  
 3.889  
 3.877  
 3.875  
 3.863  
 3.858  
 3.846  
 3.008  
 2.997  
 2.382  
 2.365  
 2.349

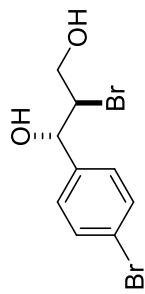

Table 2, Entry 1, 2a

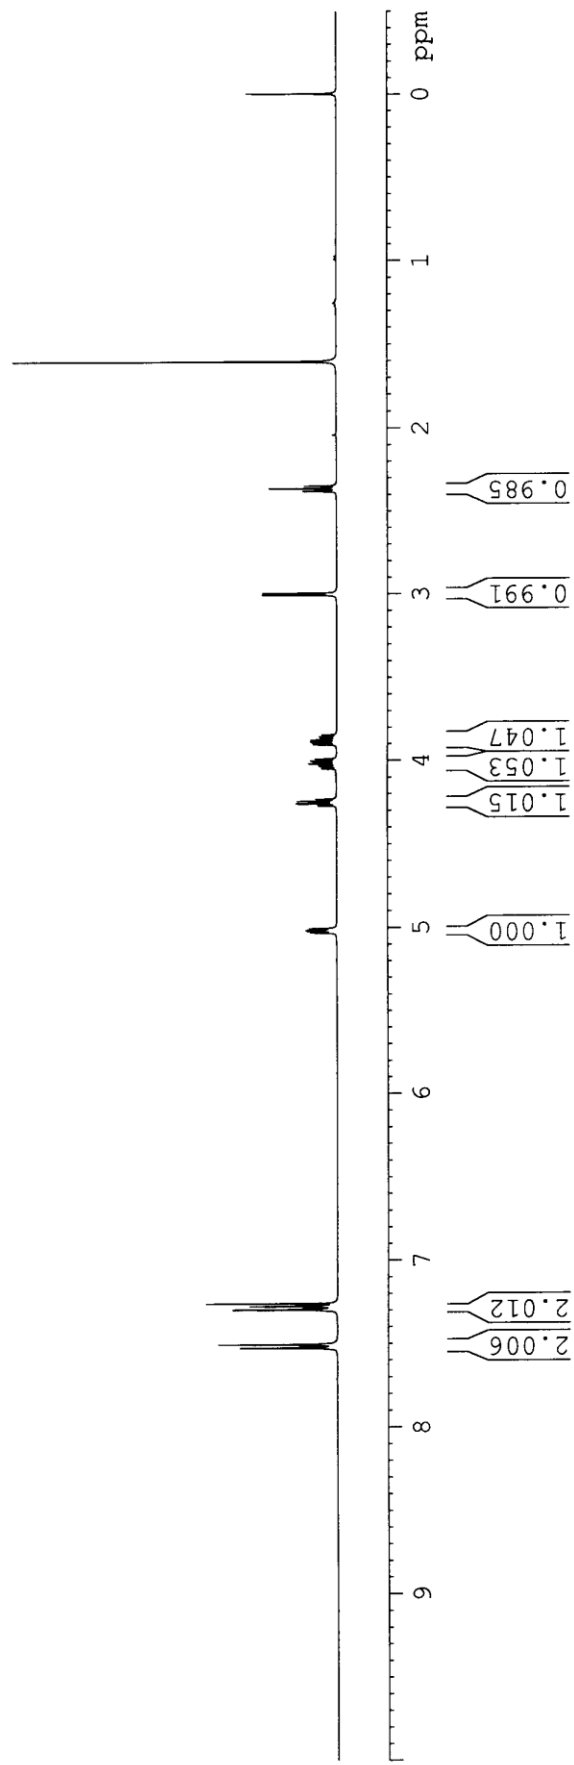

— 139.432  
— 131.923  
— 128.481  
— 122.620

— 77.545  
— 77.227  
— 76.910  
— 76.337  
— 64.328  
— 59.429

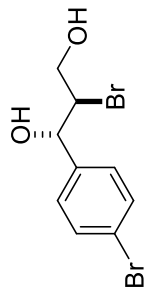

Table 2, Entry 1, 2a

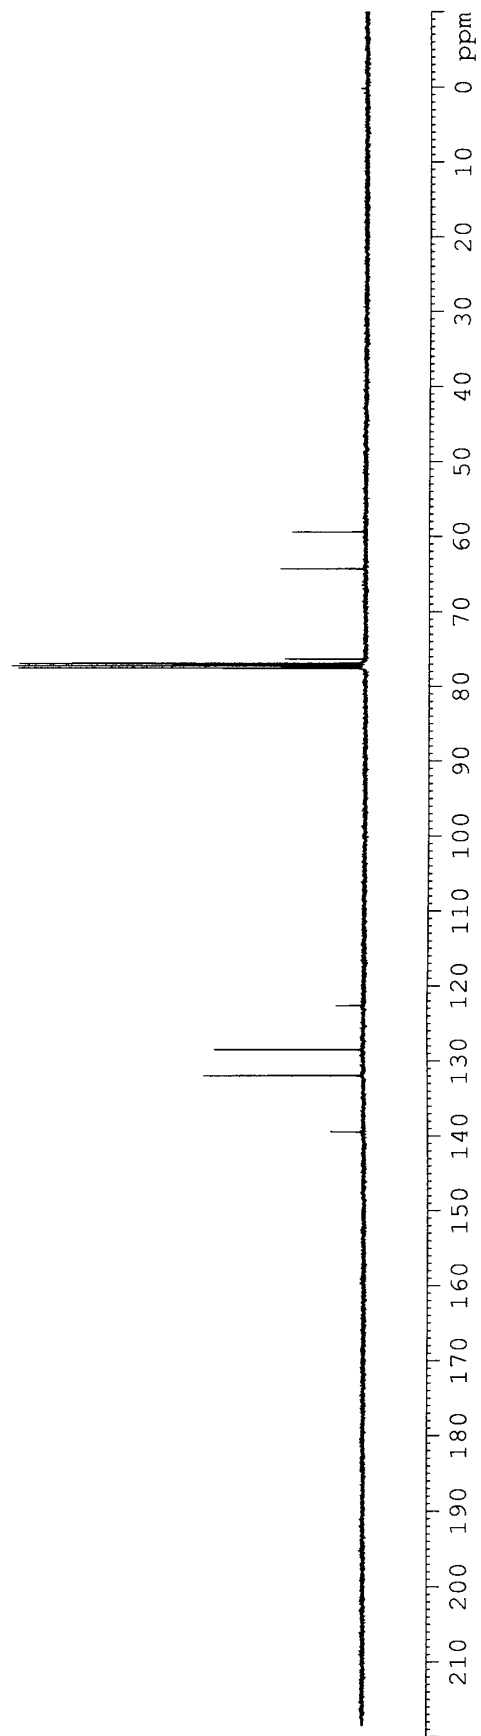

7.378  
 7.376  
 7.371  
 7.363  
 7.356  
 7.352  
 7.345  
 7.337  
 7.330  
 7.260  
 5.049  
 5.039  
 5.034  
 5.023  
 4.277  
 4.265  
 4.261  
 4.252  
 4.249  
 4.237  
 4.052  
 4.040  
 4.036  
 4.021  
 4.008  
 4.005  
 3.992  
 3.908  
 3.897  
 3.892  
 3.880  
 3.877  
 3.866  
 3.861  
 3.849  
 2.987  
 2.977  
 2.377  
 2.361  
 2.344

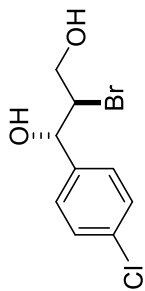

Table 2, Entry 2, **2b**

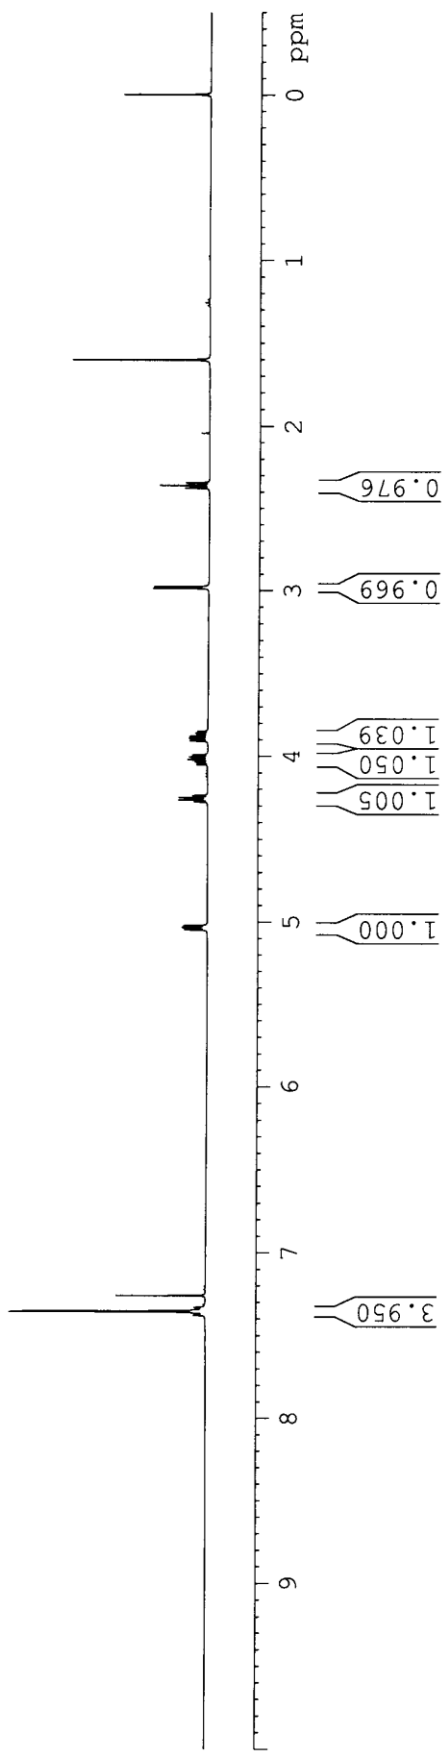



138.978  
134.396  
128.922  
128.180

77.547  
77.229  
76.912  
76.218  
64.341  
59.191

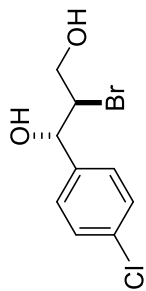

Table 2, Entry 2, **2b**

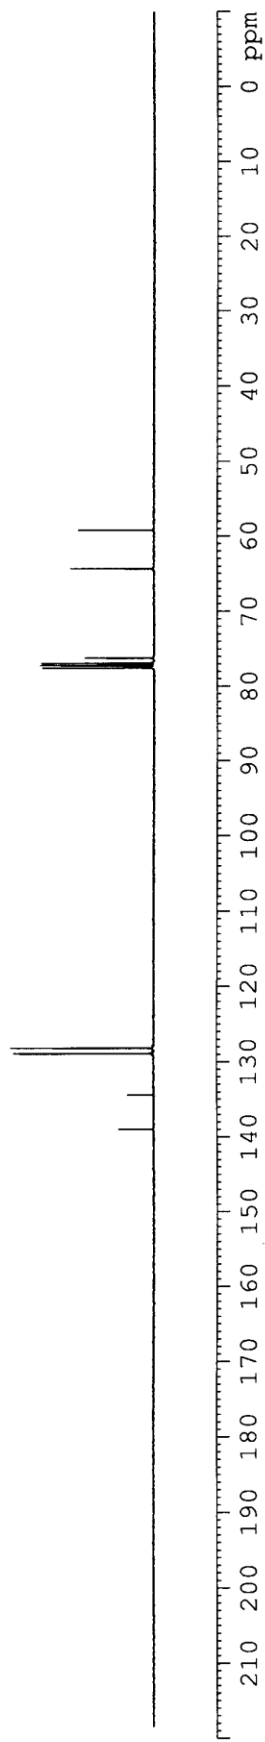

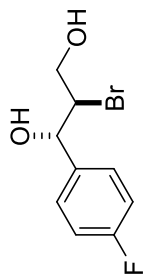

Table 2, Entry 3, 2c

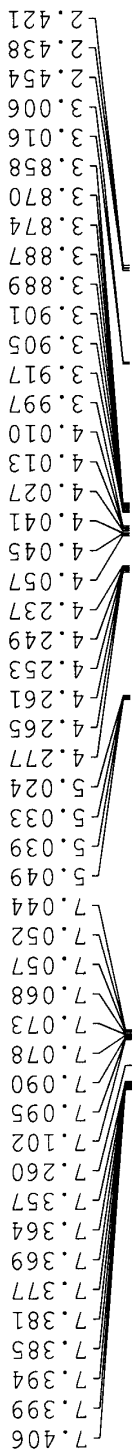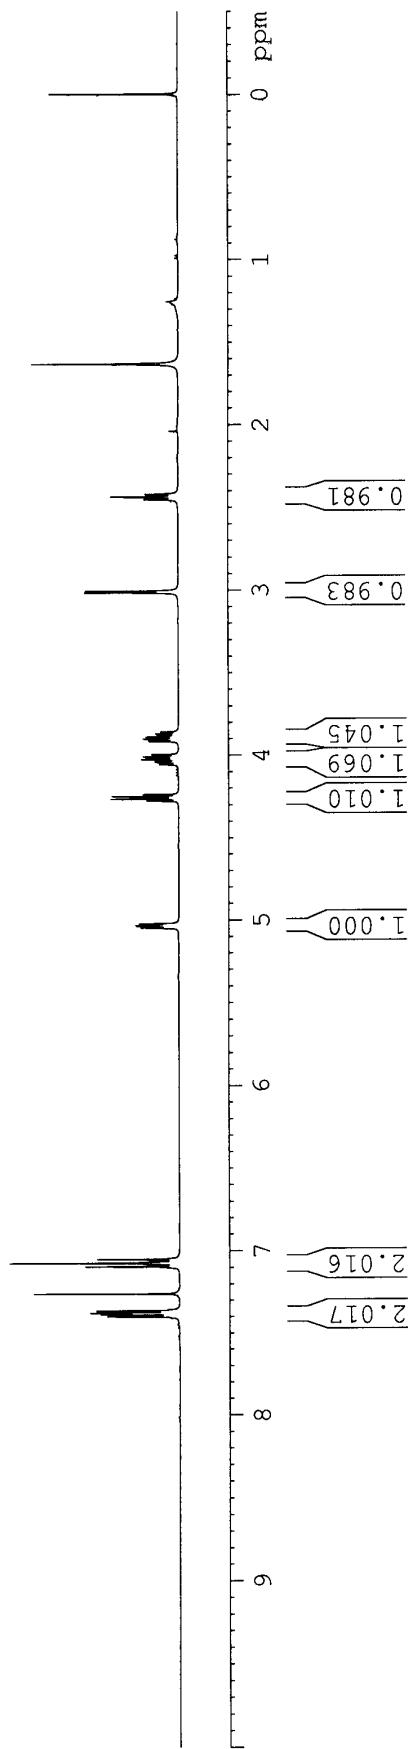

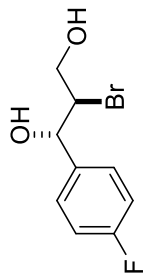

Table 2, Entry 3, **2c**

|         |         |
|---------|---------|
| 164.007 | 161.551 |
| 136.346 | 136.314 |
| 128.558 | 128.475 |
| 115.792 | 115.577 |
| 77.543  | 77.226  |
| 76.908  | 76.276  |
| 64.401  | 59.551  |

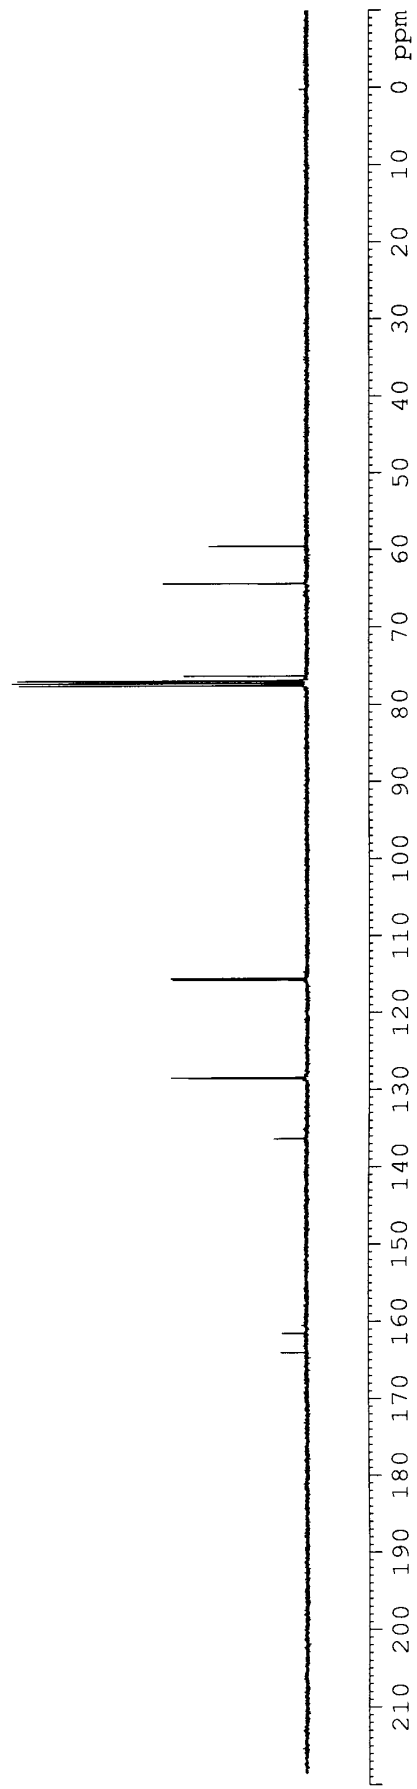

7.671  
 7.668  
 7.663  
 7.651  
 7.635  
 7.630  
 7.498  
 7.483  
 7.478  
 7.465  
 7.446  
 7.390  
 7.387  
 7.376  
 7.371  
 7.366  
 7.353  
 4.995  
 4.983  
 4.979  
 4.967  
 4.370  
 4.356  
 4.342  
 4.328  
 4.004  
 3.992  
 3.937  
 3.922  
 3.906  
 3.892  
 3.877  
 3.852  
 3.839  
 3.836  
 3.824  
 3.821  
 3.809  
 3.805  
 3.793  
 3.316  
 3.301  
 3.286  
 1.952  
 1.946  
 1.940  
 1.934  
 1.928

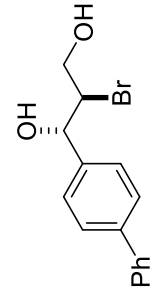

Table 2, Entry 4, 2d

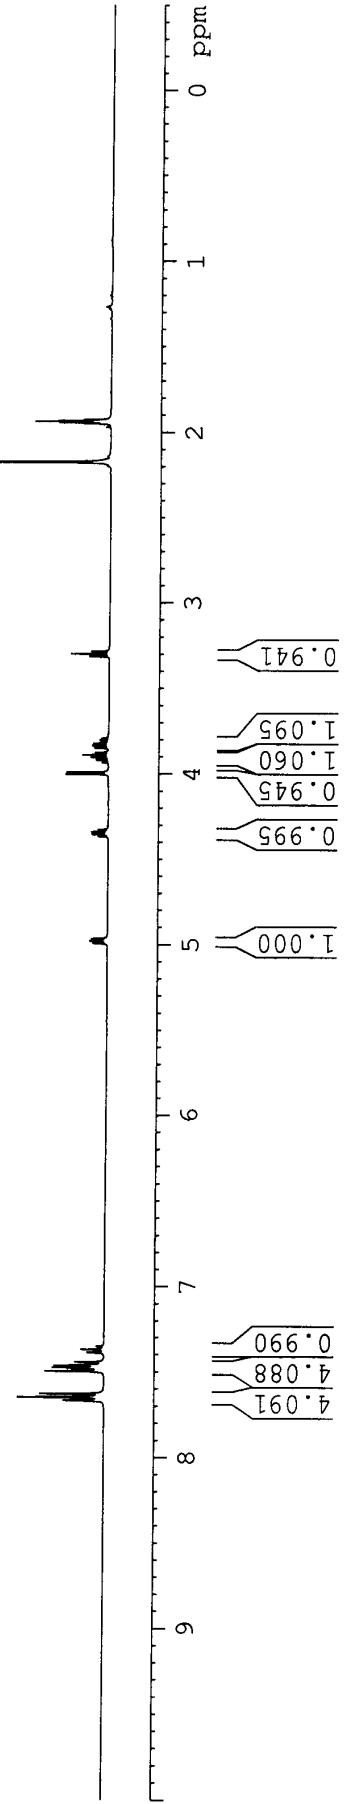

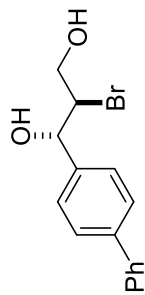Table 2, Entry 4, **2d**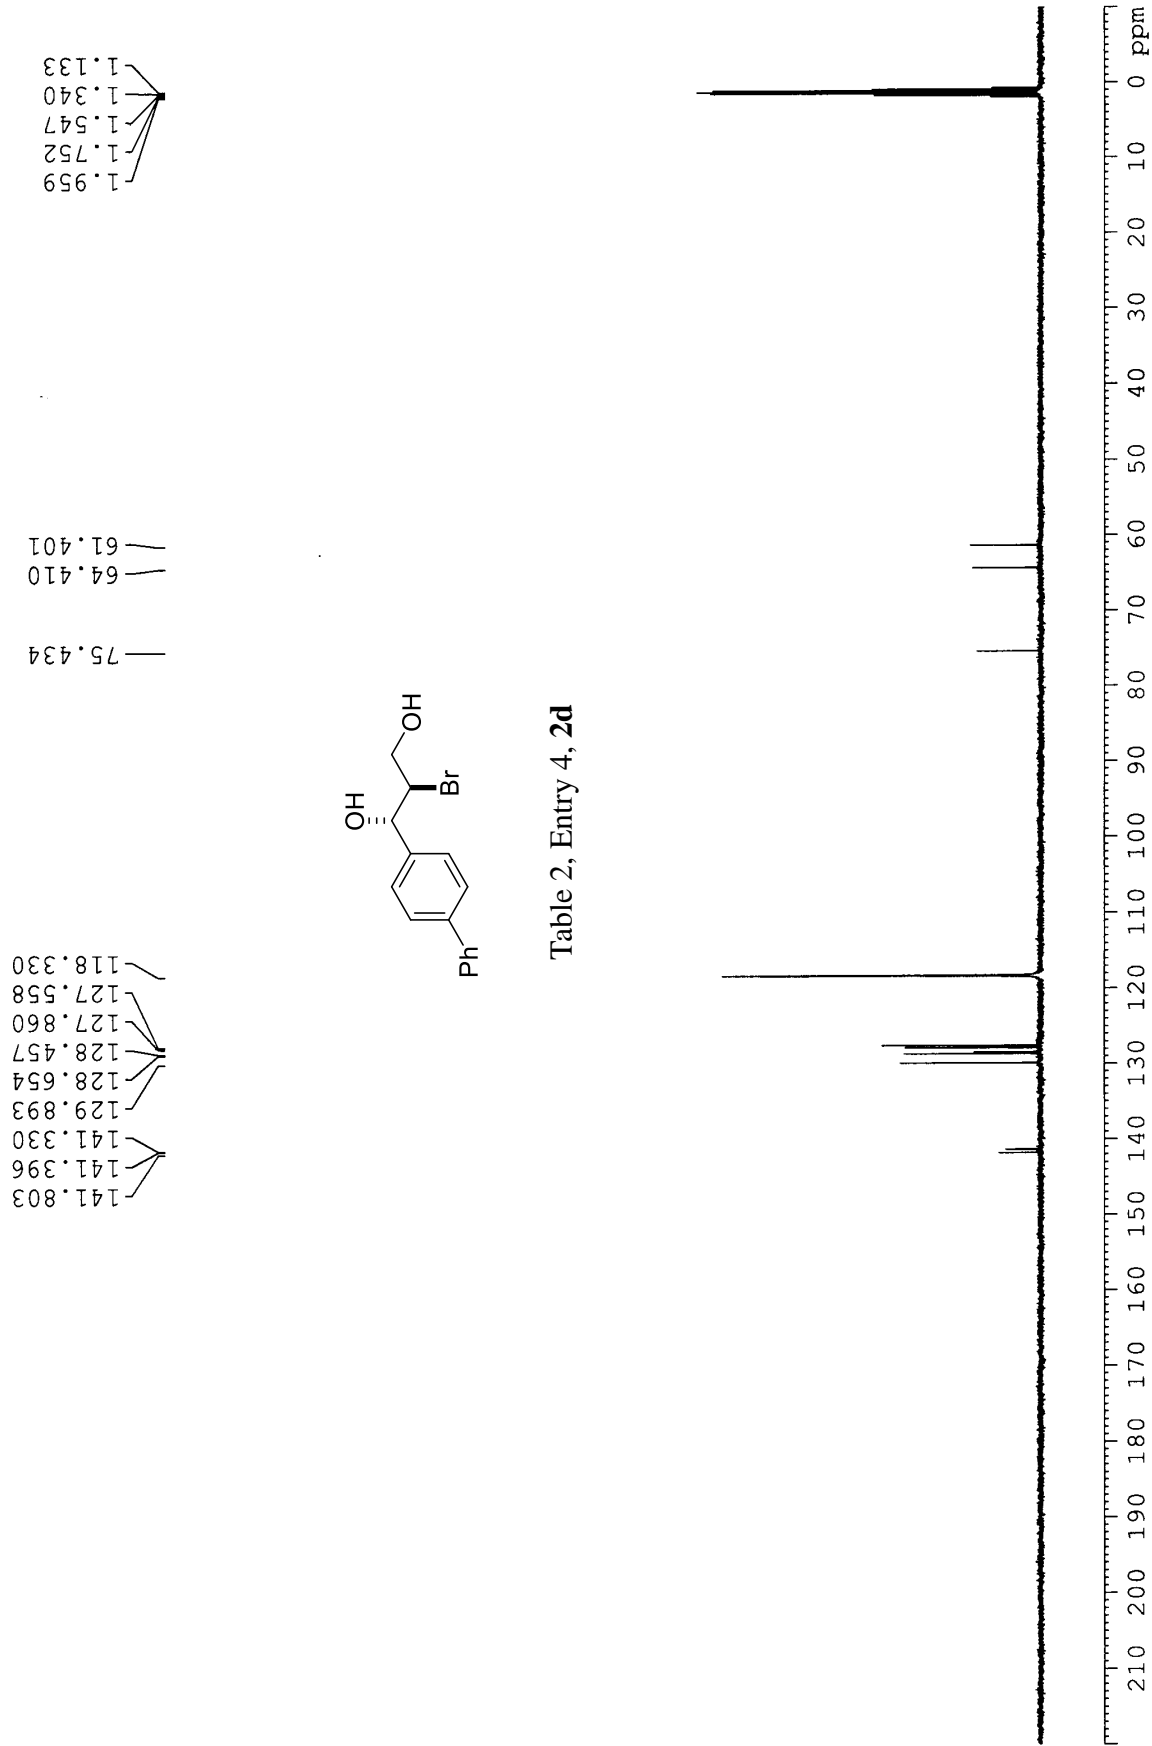

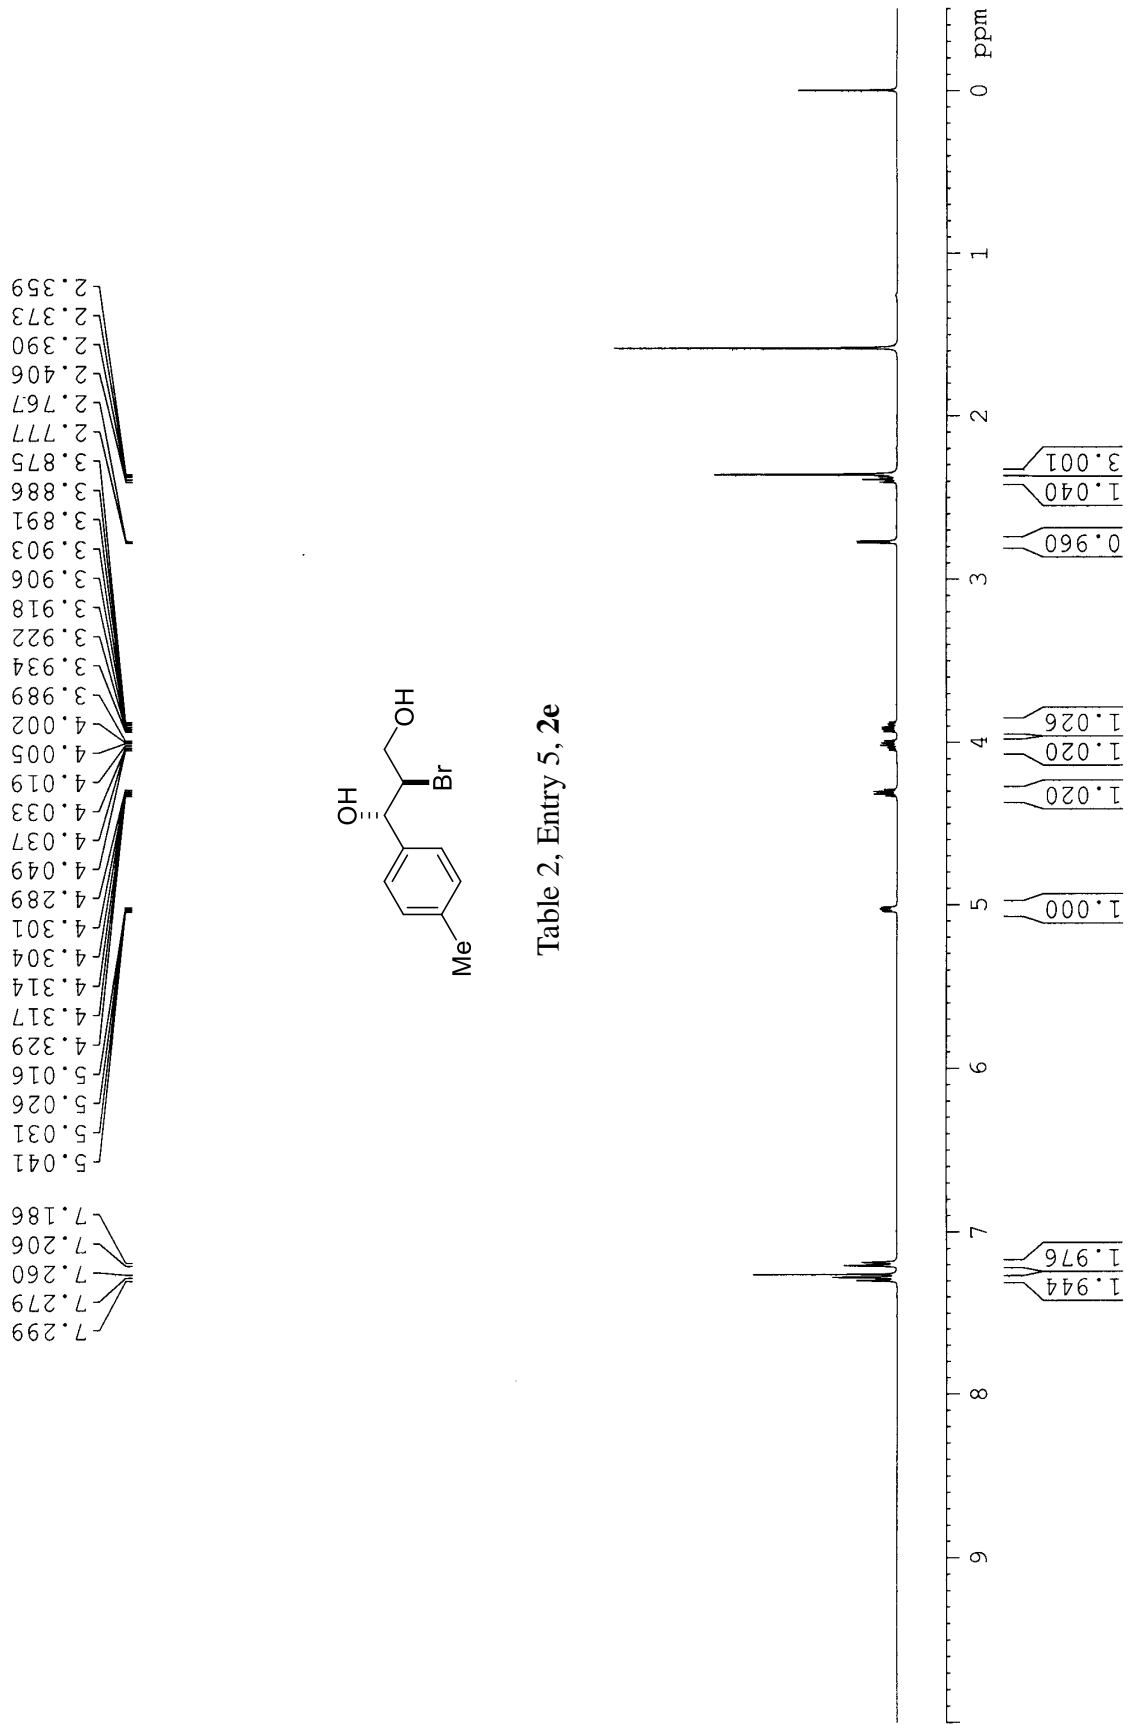

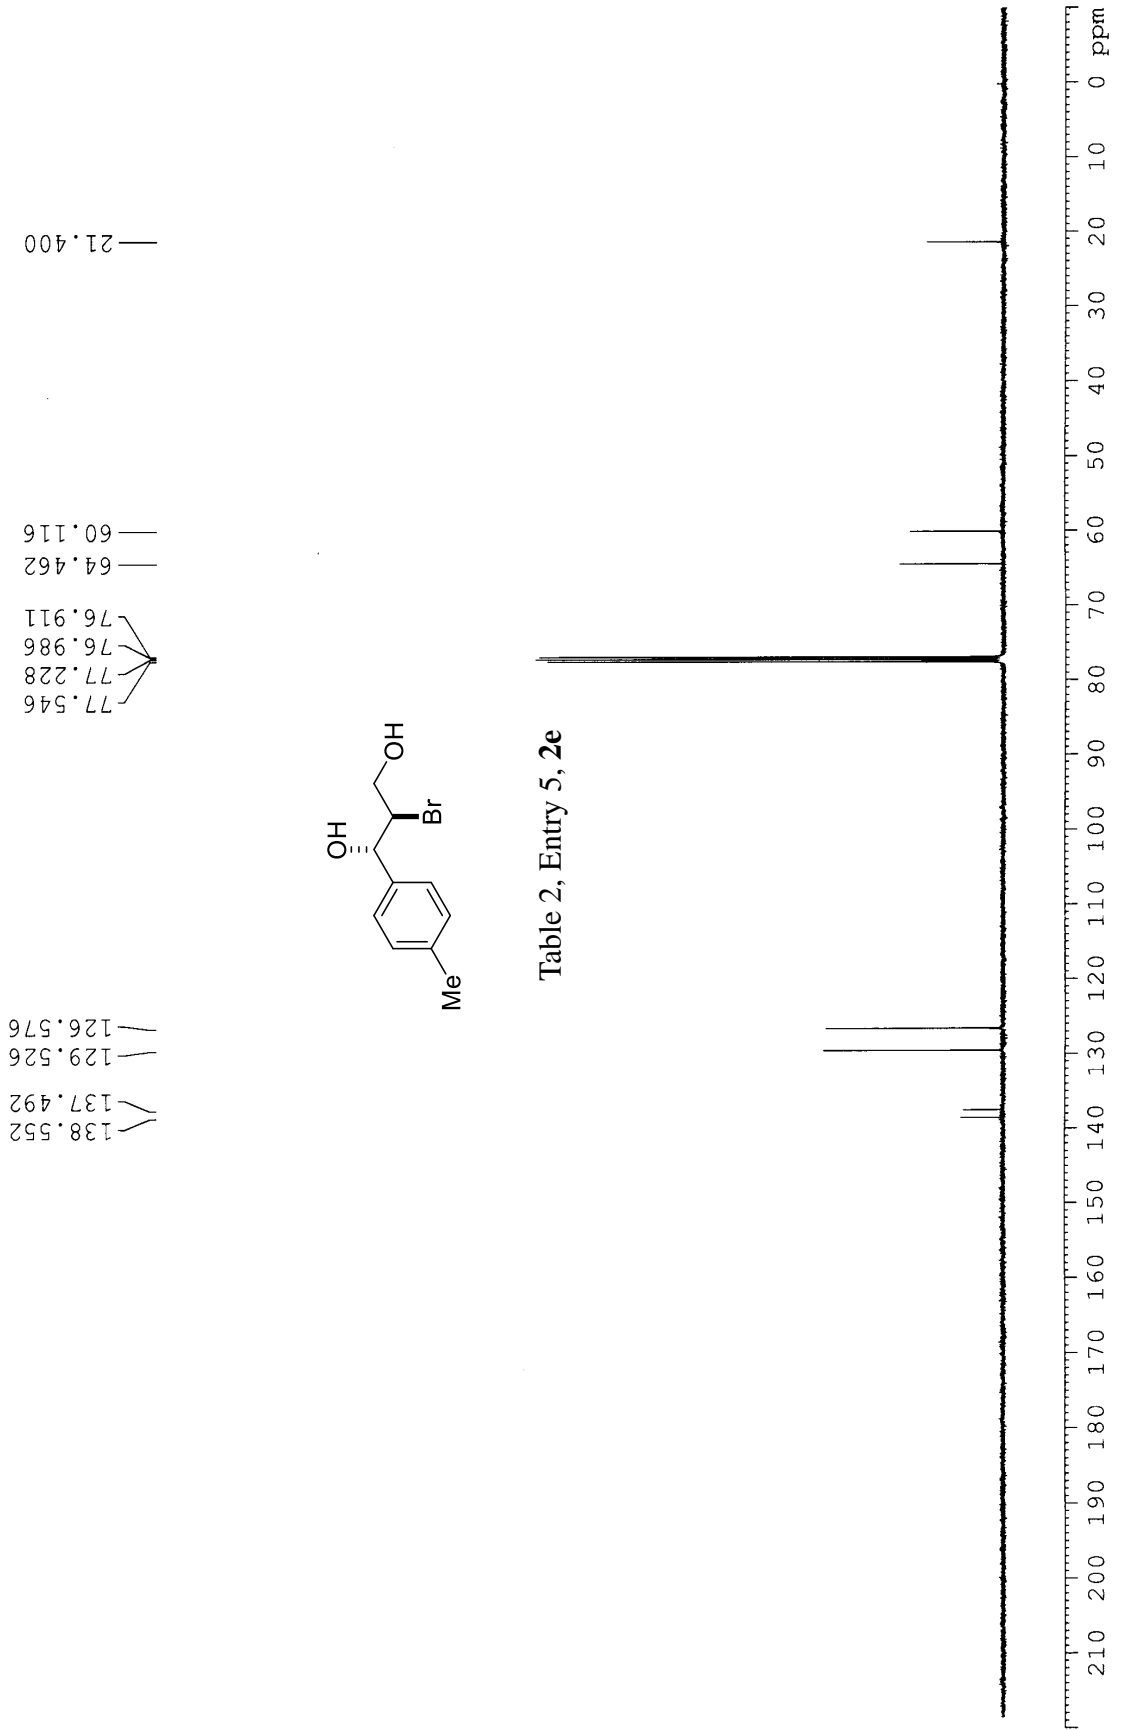

5.035  
5.021  
4.338  
4.325  
4.313  
4.311  
4.298  
4.040  
4.028  
4.009  
3.997  
3.914  
3.902  
3.882  
3.871  
2.918  
2.463  
2.372

7.293  
7.274  
7.260  
7.255  
7.210  
7.197  
7.178  
7.156  
7.137

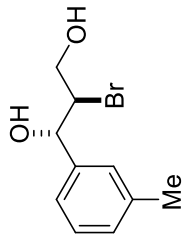

Table 2, Entry 6, 2f

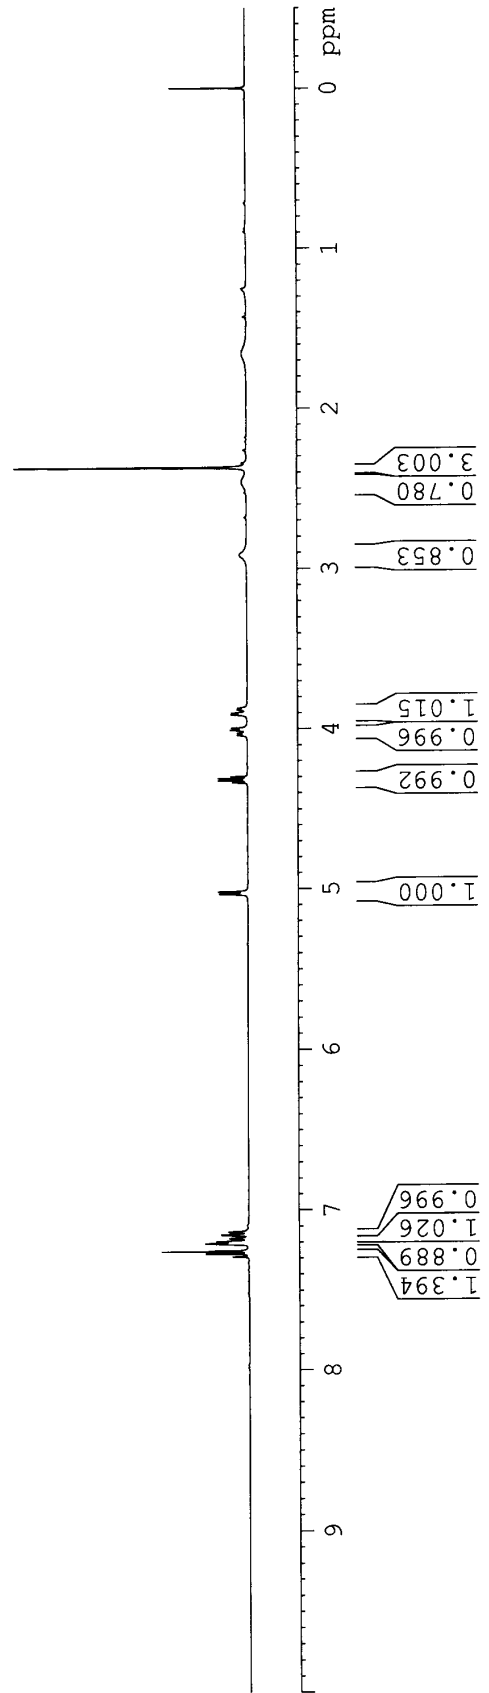



140.416  
138.501  
129.382  
128.650  
127.297  
123.766

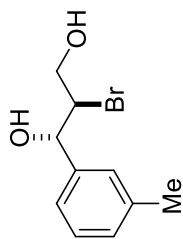

77.549  
77.231  
77.042  
76.913  
64.352  
59.707  
21.673

Table 2, Entry 6, 2f

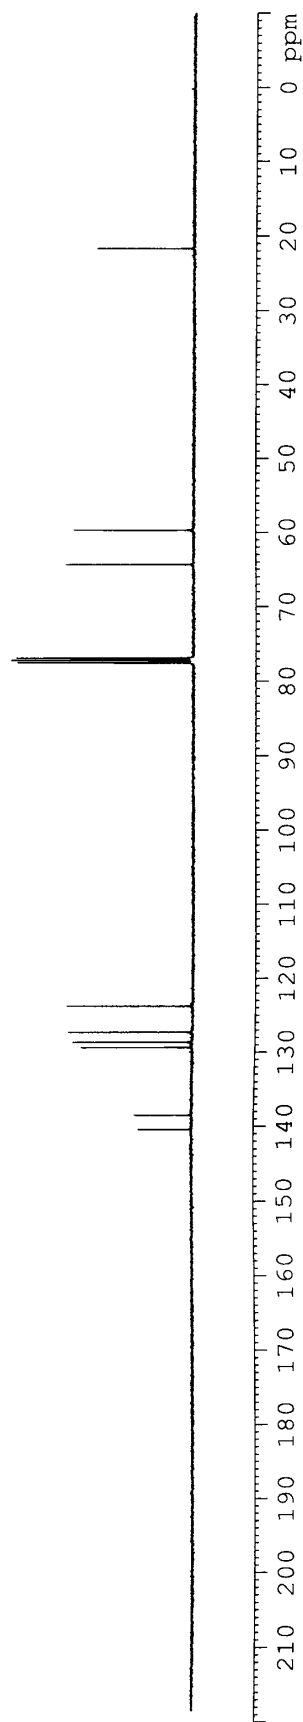

2.380  
 2.426  
 2.443  
 2.459  
 2.804  
 2.814  
 3.911  
 3.922  
 3.928  
 3.939  
 3.943  
 3.954  
 3.960  
 3.970  
 4.052  
 4.064  
 4.068  
 4.081  
 4.083  
 4.096  
 4.100  
 4.112  
 4.298  
 4.310  
 4.313  
 4.322  
 4.324  
 4.336  
 5.308  
 5.318  
 5.322  
 5.333  
 7.166  
 7.170  
 7.184  
 7.188  
 7.217  
 7.221  
 7.235  
 7.239  
 7.252  
 7.260  
 7.271  
 7.275  
 7.289  
 7.293  
 7.505  
 7.509  
 7.523  
 7.528

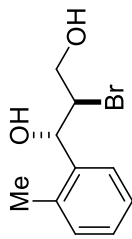

Table 2, Entry 7, 2g

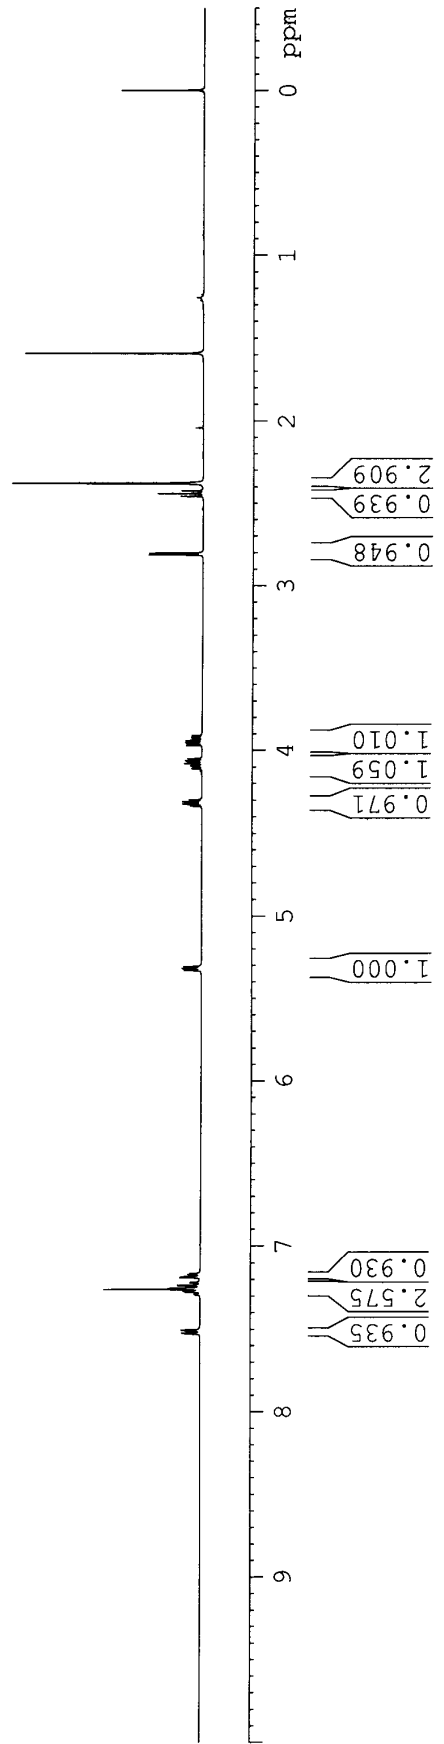

138.754  
135.376  
130.884  
128.433  
126.671  
125.783

77.548  
77.230  
76.912  
73.814  
64.359  
58.552  
19.500

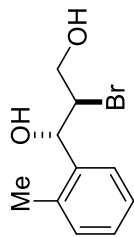

Table 2, Entry 7, 2g

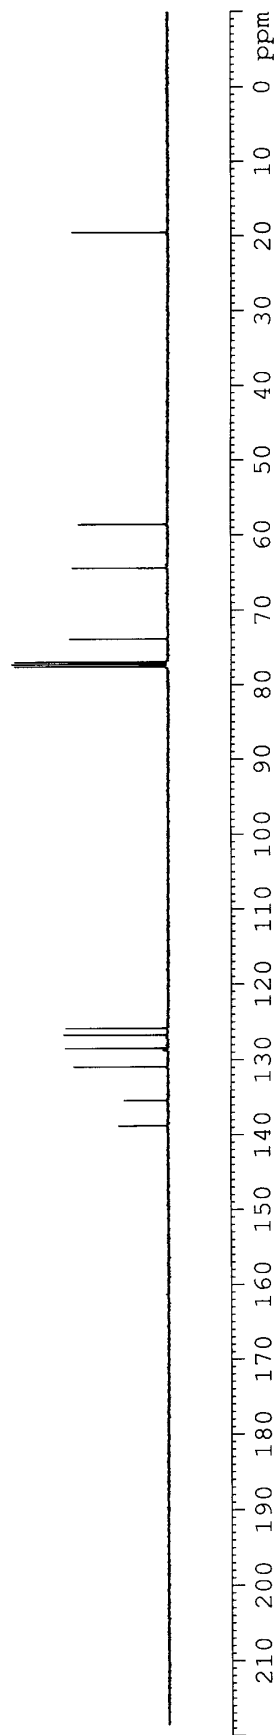

7.413  
 7.402  
 7.395  
 7.390  
 7.388  
 7.382  
 7.375  
 7.371  
 7.368  
 7.359  
 7.352  
 7.348  
 7.345  
 7.343  
 7.338  
 7.333  
 7.329  
 7.325  
 7.322  
 7.316  
 7.260  
 5.075  
 5.065  
 5.061  
 5.050  
 4.550  
 4.299  
 4.311  
 4.314  
 4.323  
 4.326  
 4.338  
 4.338  
 4.034  
 4.037  
 4.019  
 4.006  
 4.003  
 3.990  
 3.922  
 3.910  
 3.905  
 3.894  
 3.891  
 3.879  
 3.874  
 3.862  
 2.952  
 2.942  
 2.456  
 2.439  
 2.423

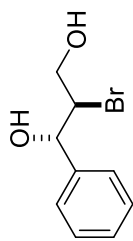

Table 2, Entry 8, 2h

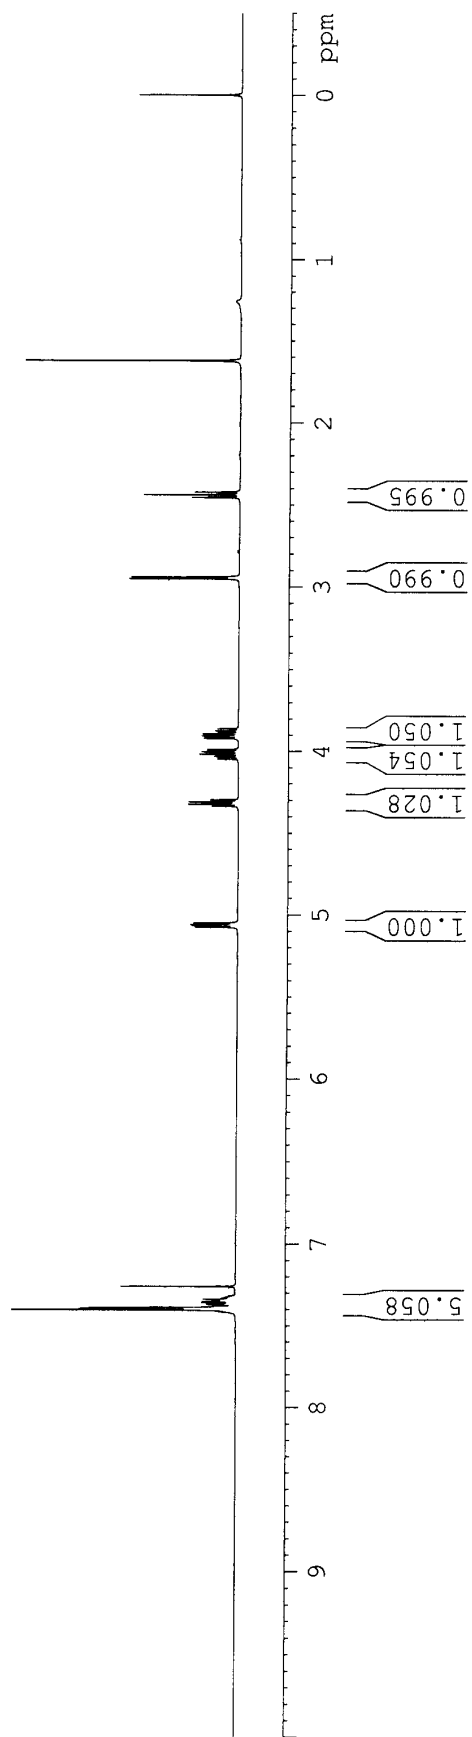

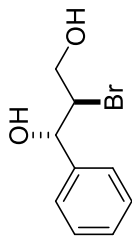

Table 2, Entry 8, 2h

77.544  
77.227  
77.091  
76.909  
64.362  
60.063

140.387  
128.849  
128.721  
126.664

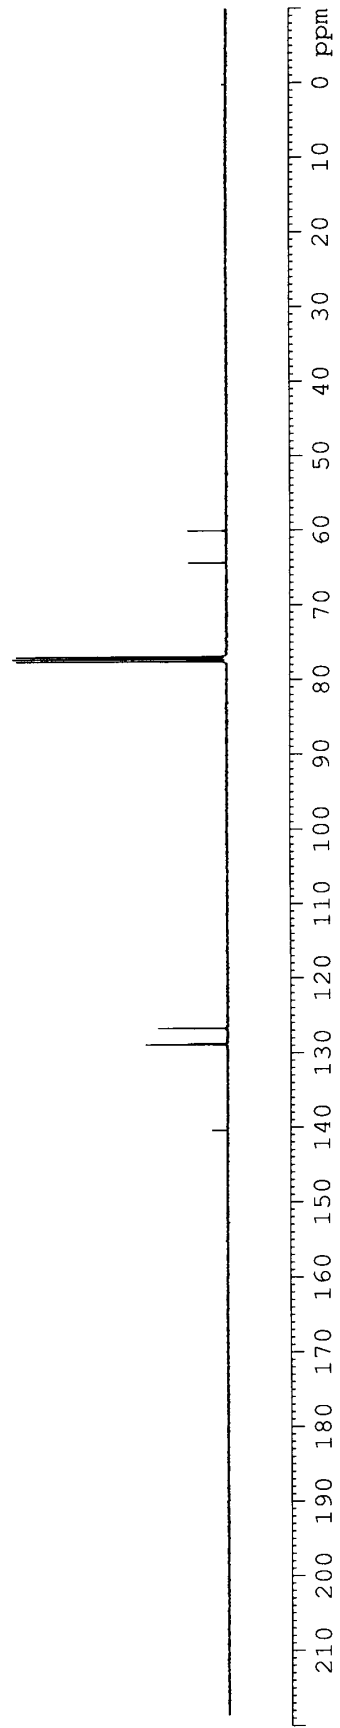

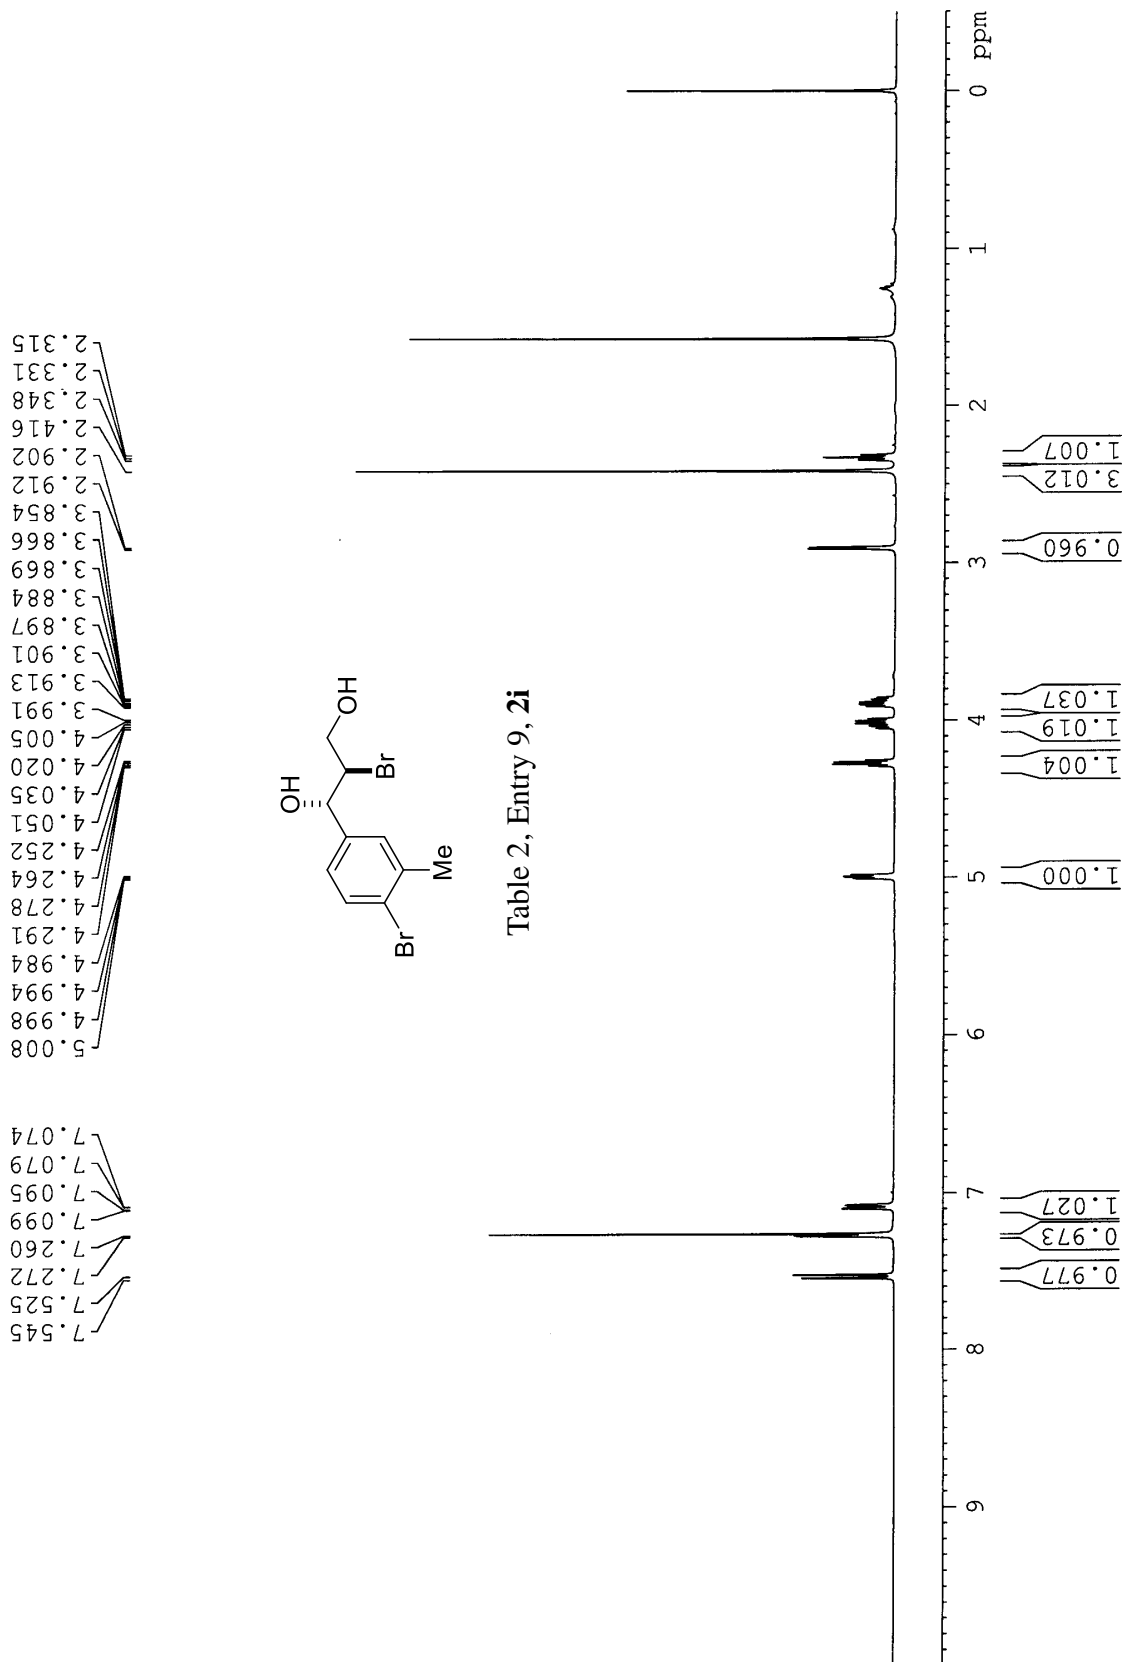

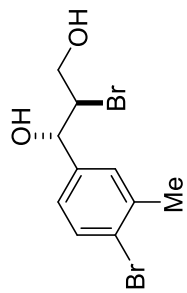

Table 2, Entry 9, 2i

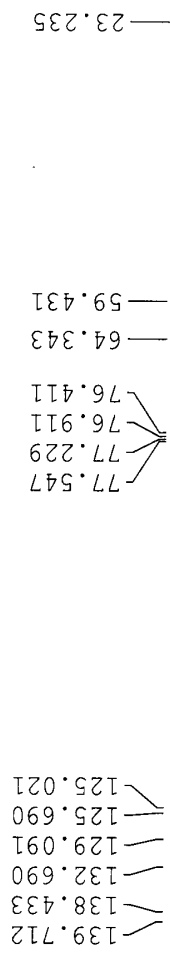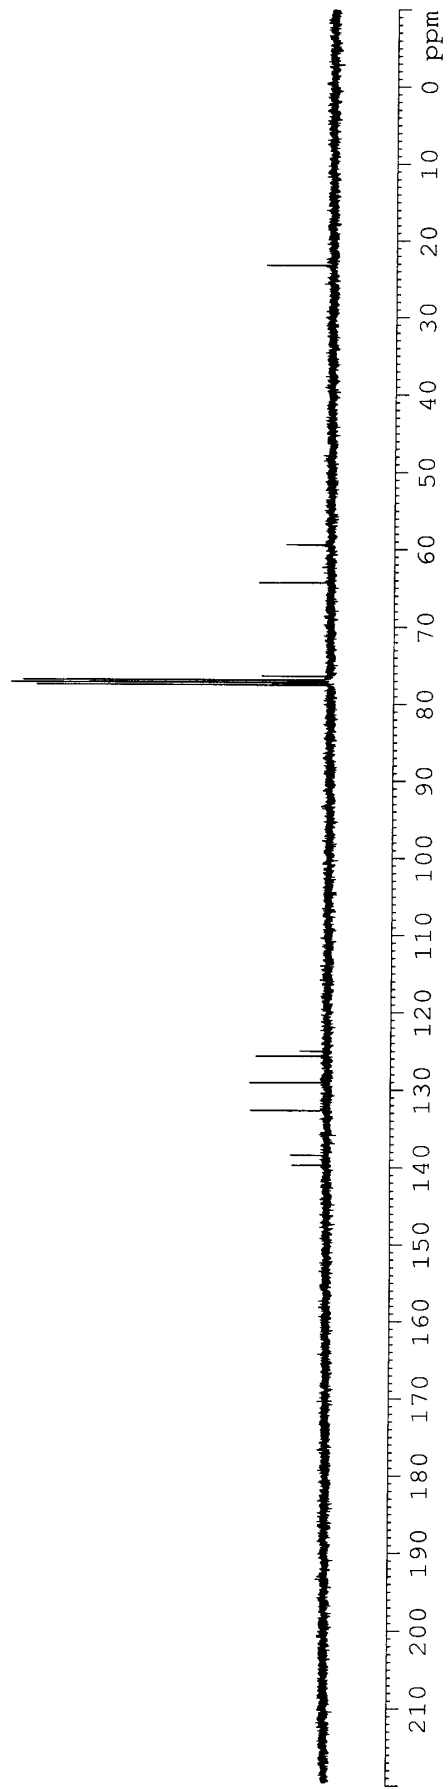

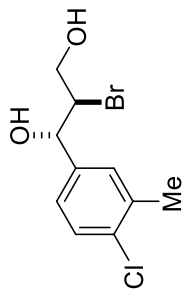

Table 2, Entry 10, 2j

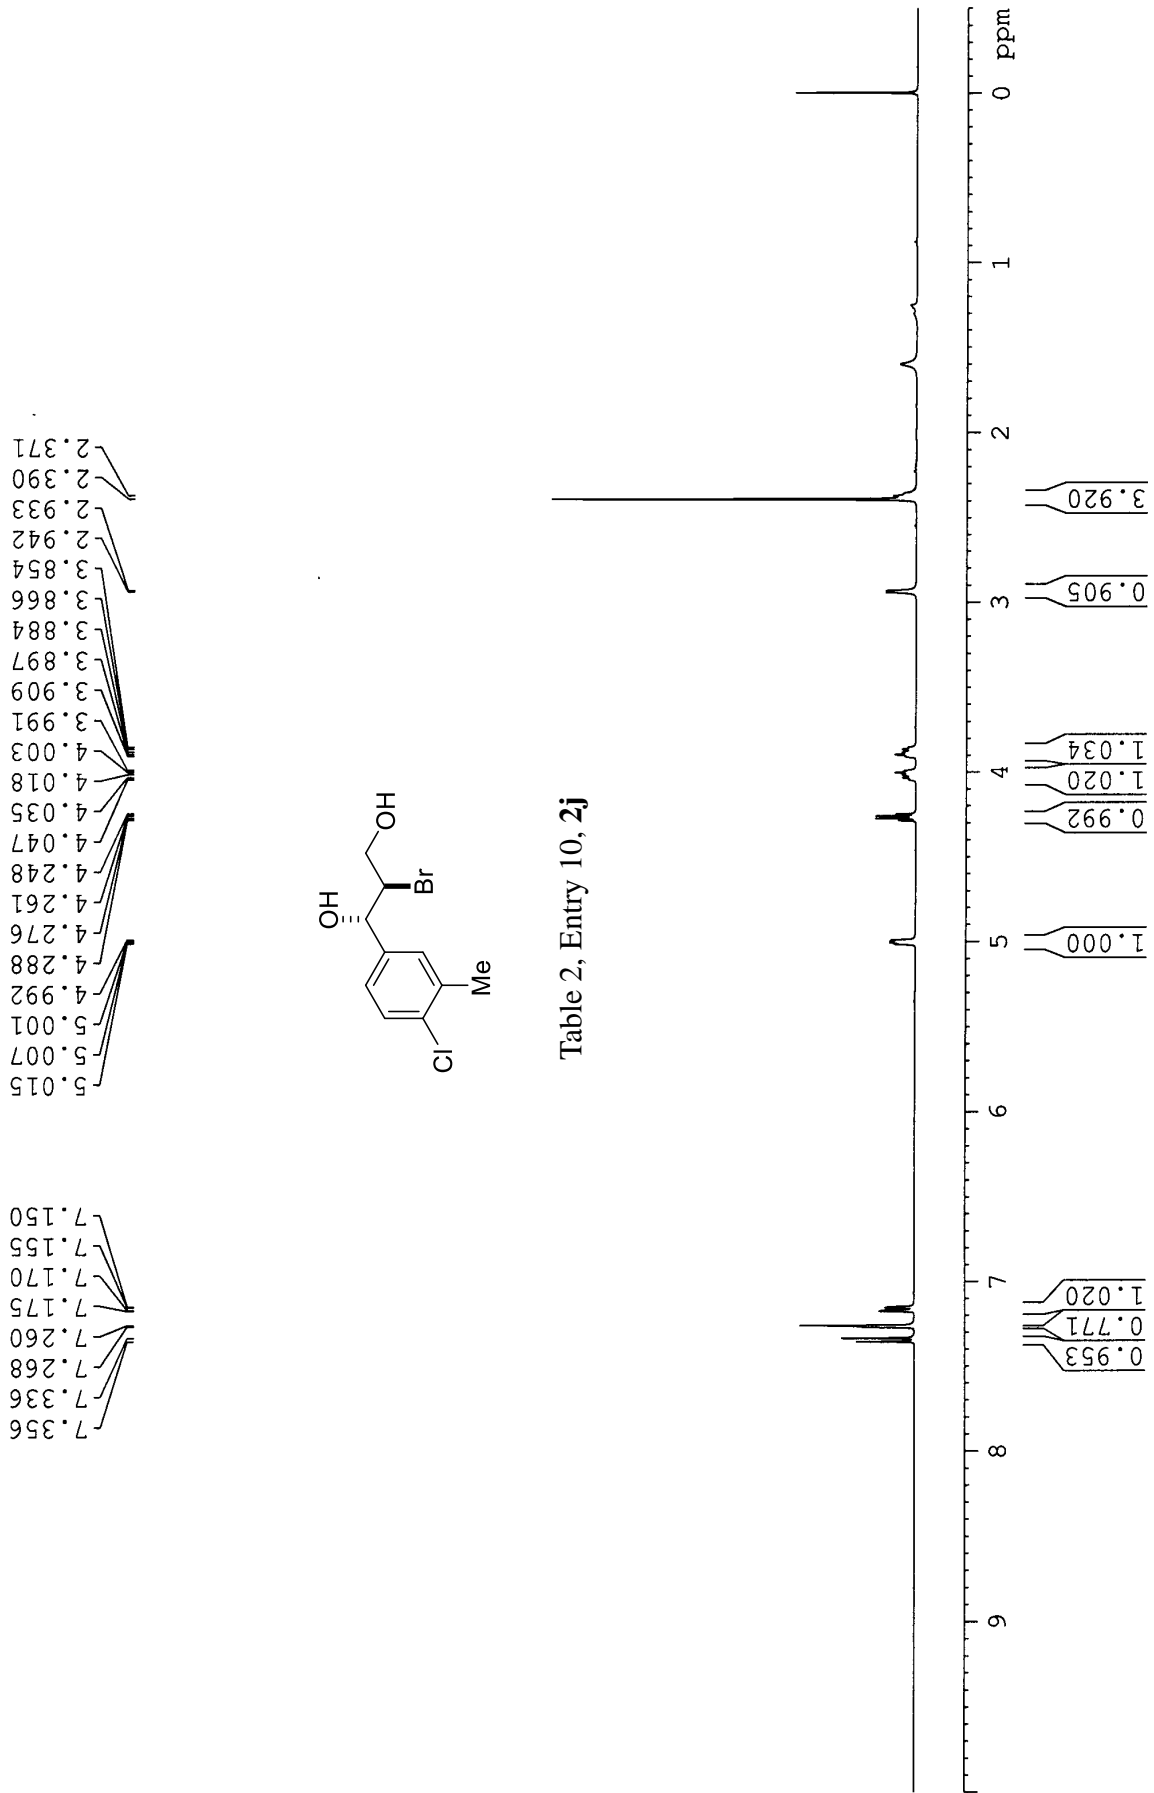



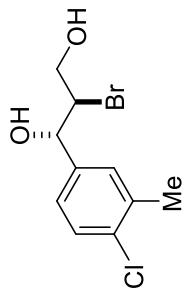

139.310  
136.859  
134.842  
129.682  
129.544  
125.784

77.865  
77.547  
77.230  
76.684  
64.674  
59.647

20.691

Table 2, Entry 10, 2j

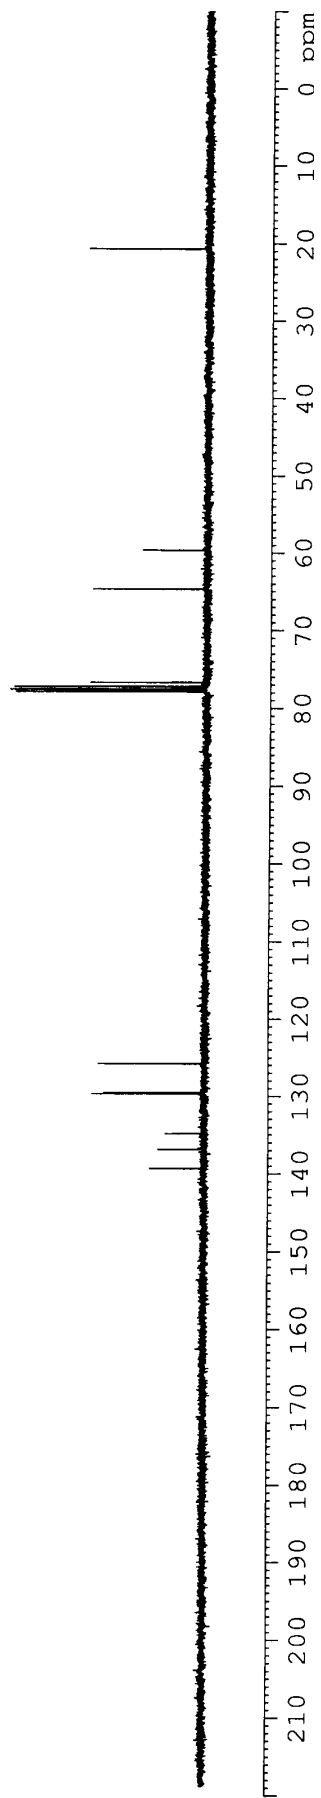

7.260  
 7.224  
 7.206  
 7.194  
 7.188  
 7.182  
 7.174  
 7.168  
 7.161  
 7.156  
 7.025  
 7.002  
 6.980  
 4.996  
 4.990  
 4.981  
 4.976  
 4.273  
 4.261  
 4.245  
 4.233  
 4.045  
 4.034  
 4.015  
 4.003  
 3.991  
 3.899  
 3.887  
 3.868  
 3.029  
 3.020  
 2.504  
 2.290  
 2.286

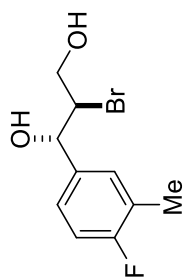

Table 2, Entry 11, 2k

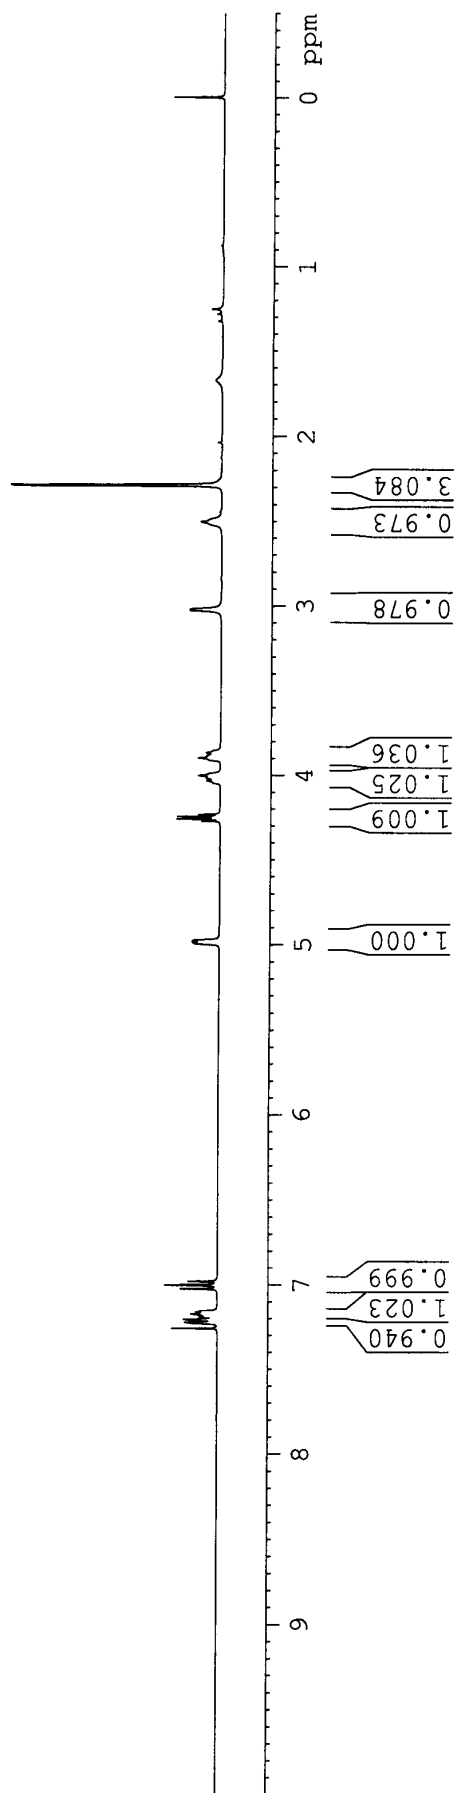

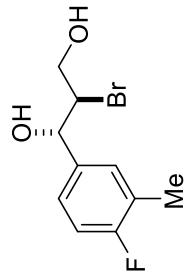

Table 2, Entry 11, 2k

|         |         |
|---------|---------|
| 162.476 | 160.034 |
| 136.055 | 129.857 |
| 136.020 | 129.803 |
| 129.857 | 125.769 |
| 129.803 | 125.687 |
| 125.769 | 125.325 |
| 125.687 | 125.150 |
| 125.325 | 115.296 |
| 125.150 | 115.072 |
| 77.546  |         |
| 77.229  |         |
| 76.911  |         |
| 76.332  |         |
| 64.399  |         |
| 59.304  |         |
| 14.833  | 14.798  |

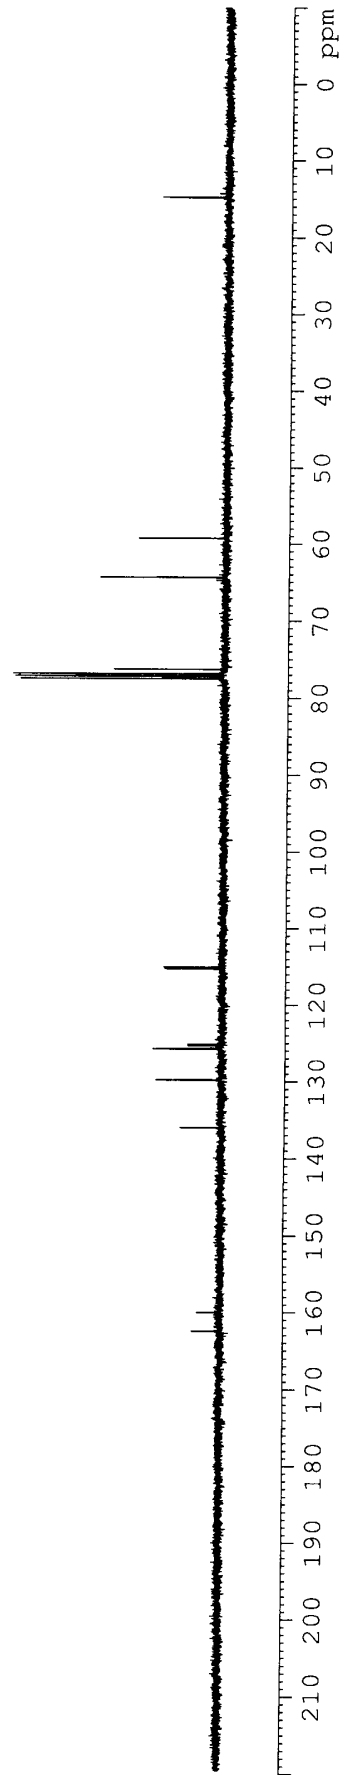

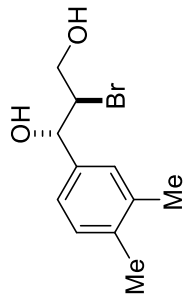

Table 2, Entry 12, 21

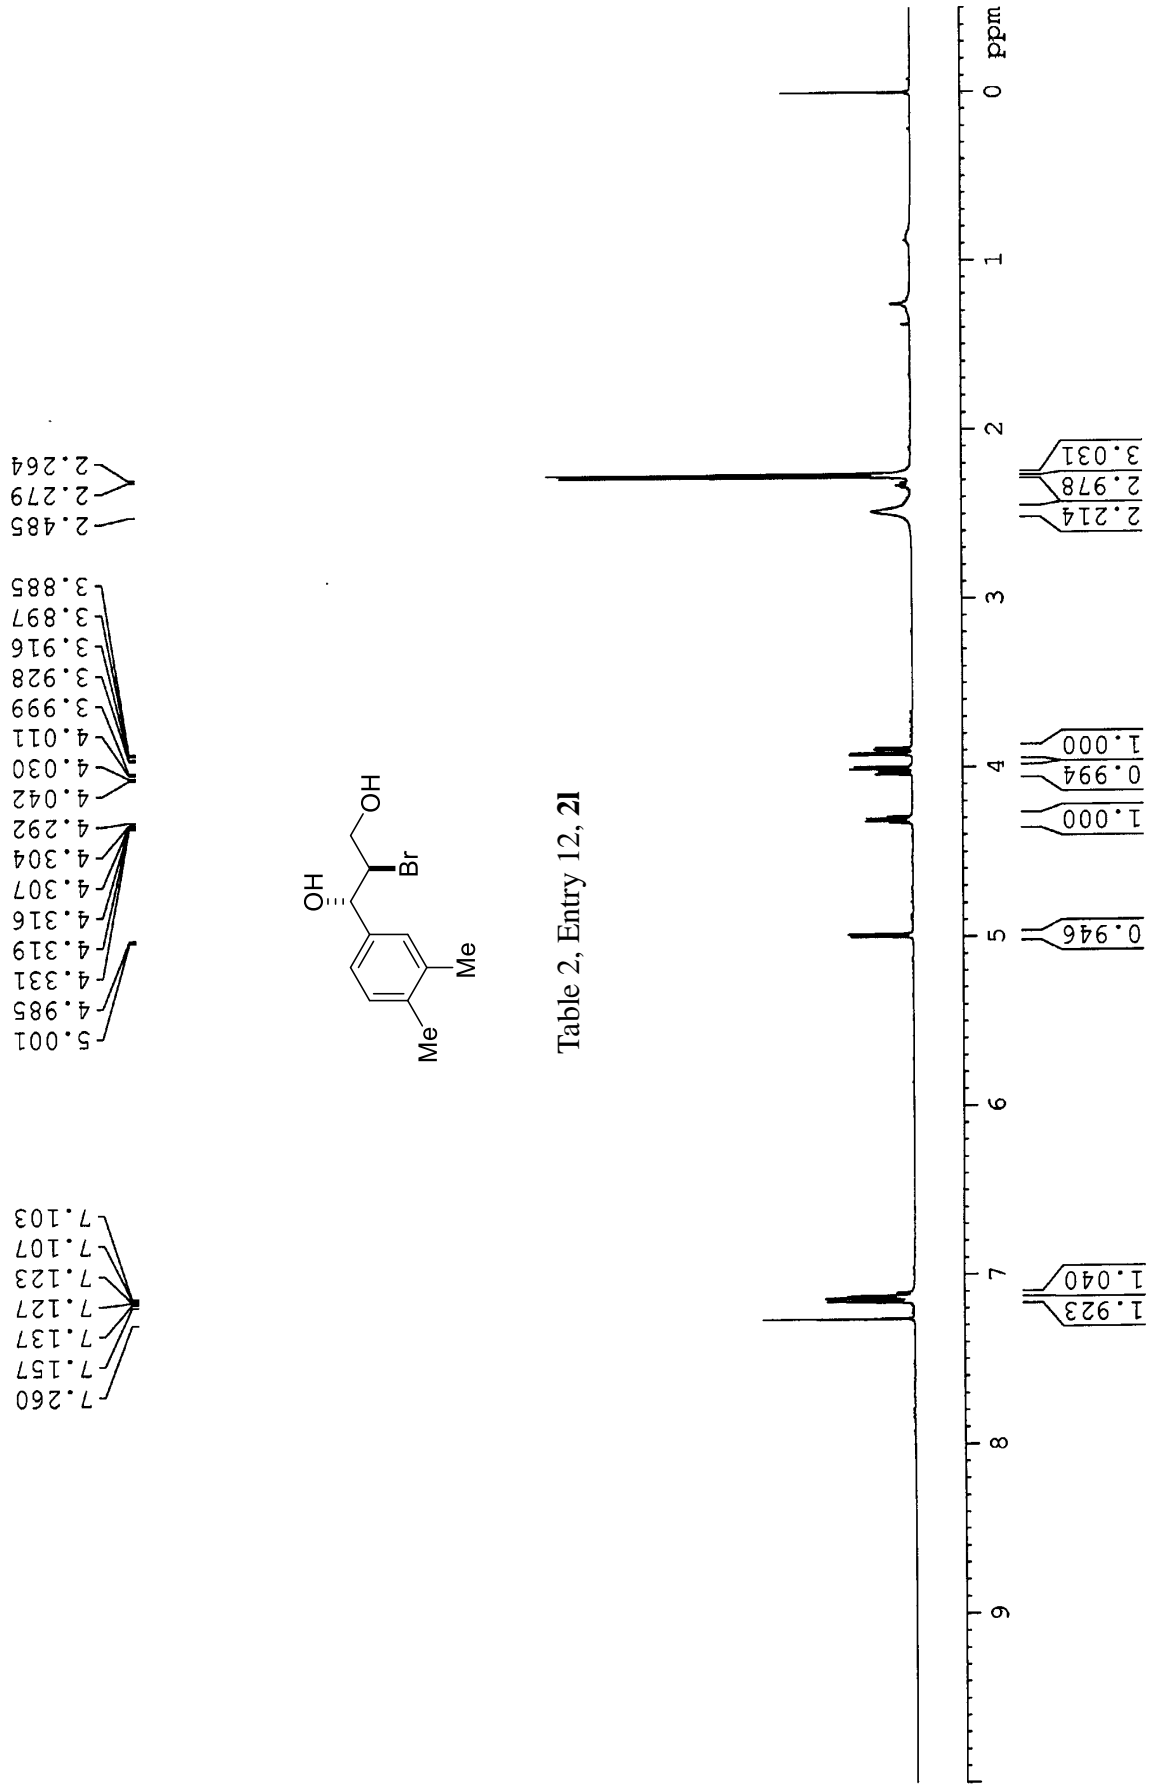

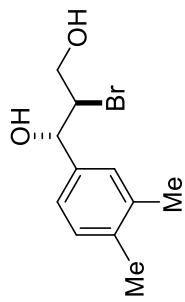

Table 2, Entry 12, 2I

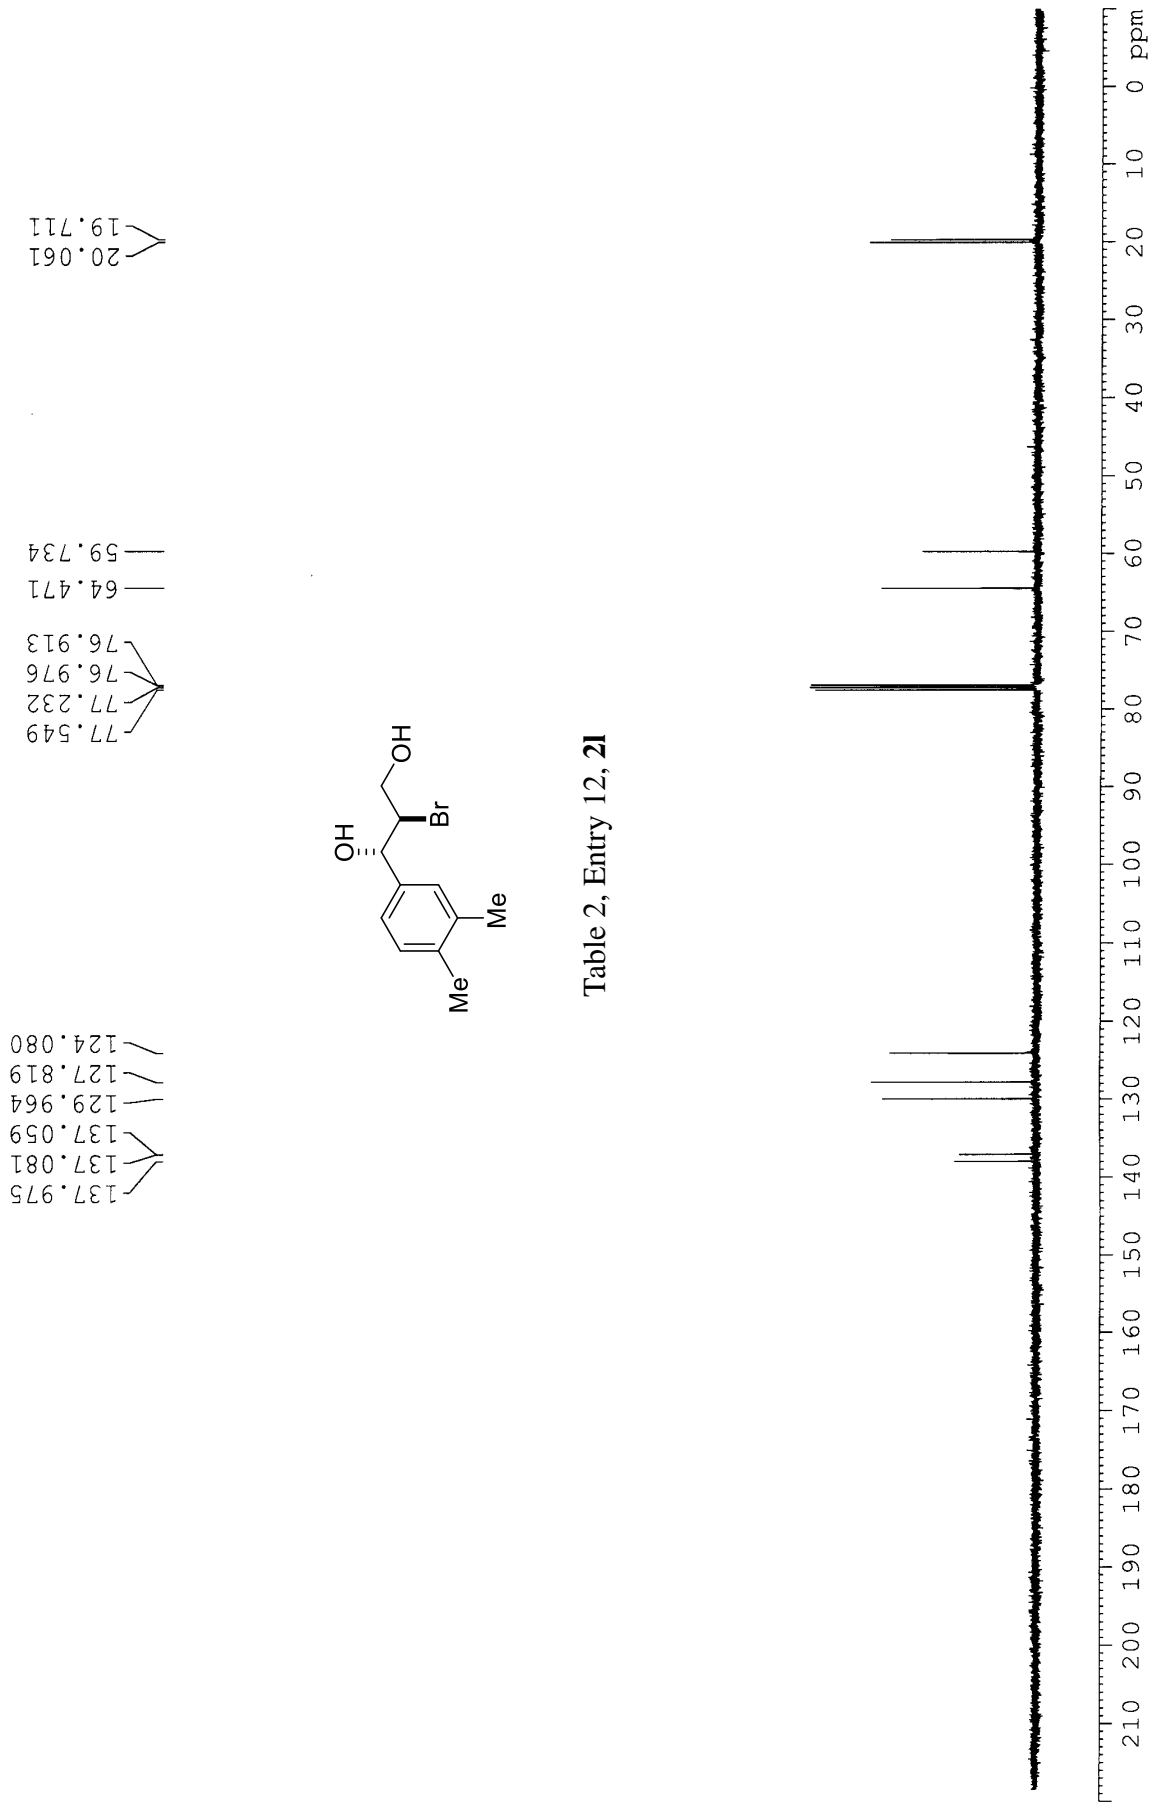

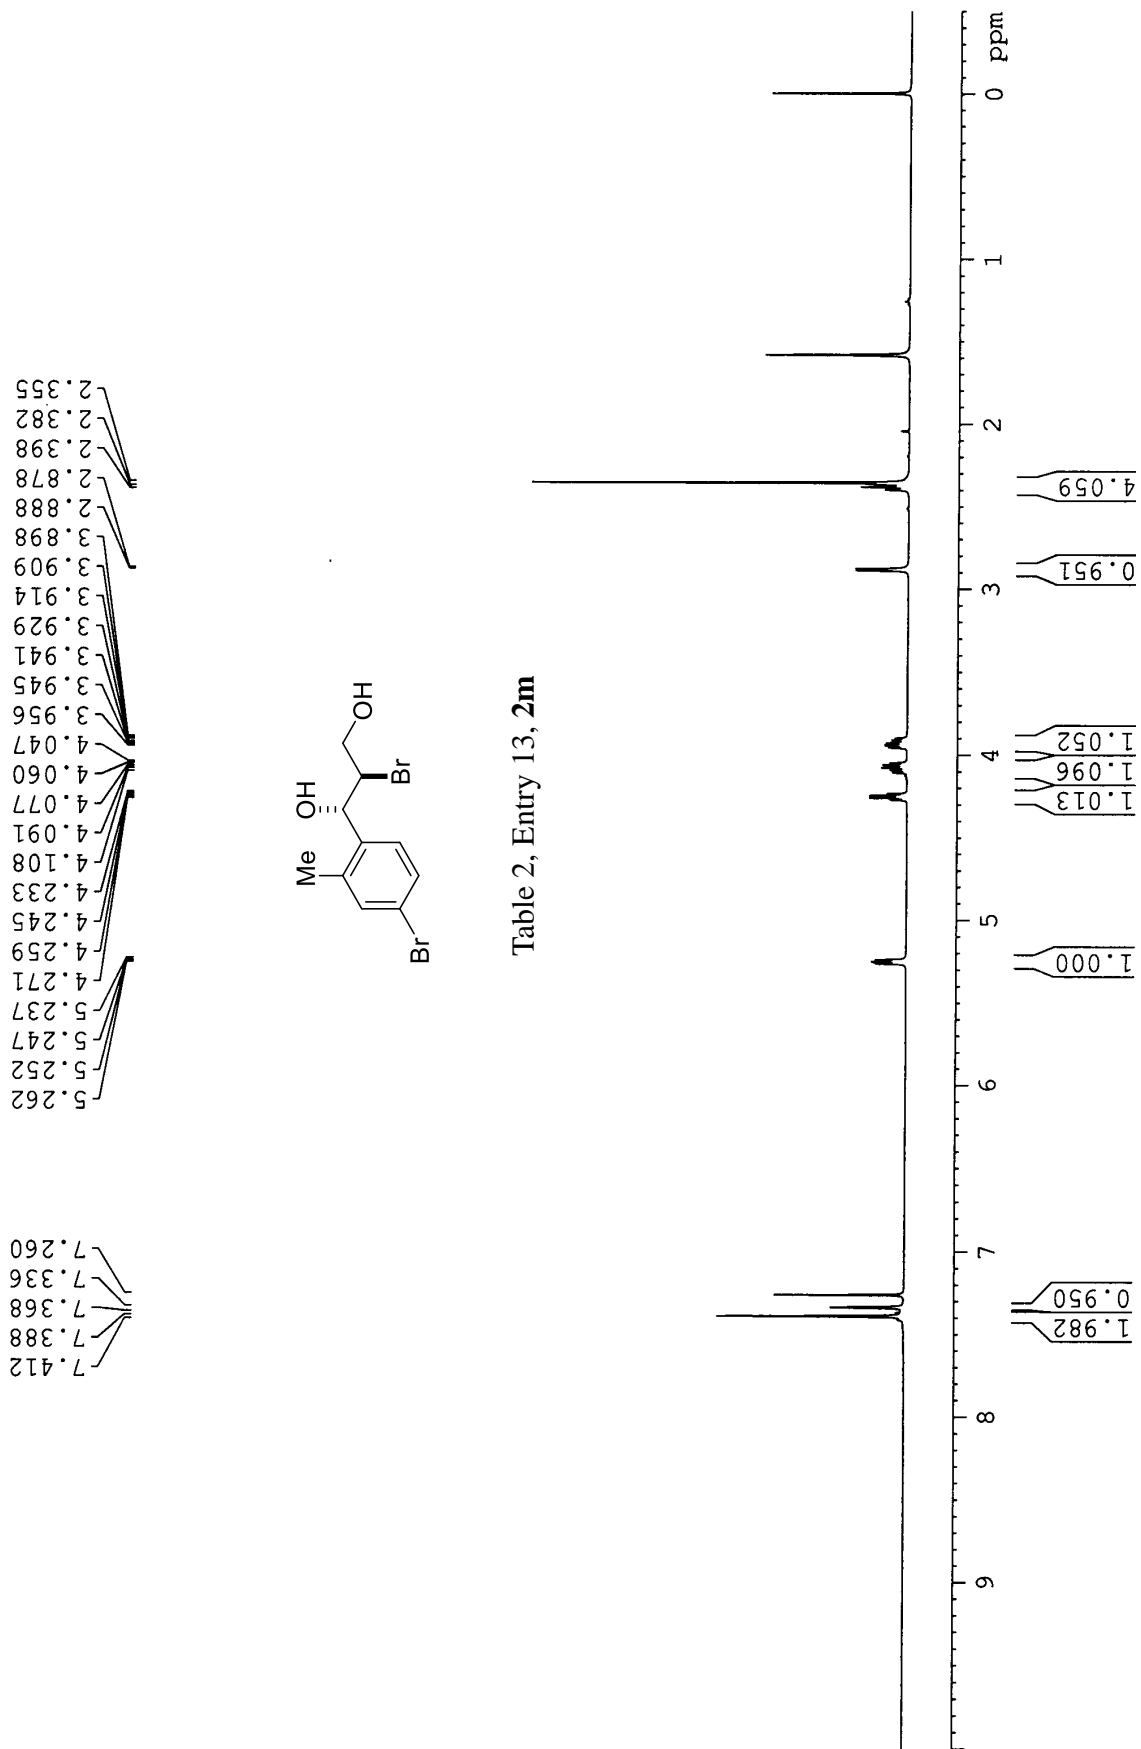

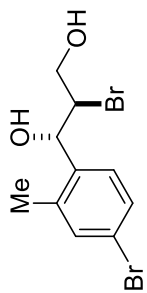

Table 2, Entry 13, 2m

|         |         |
|---------|---------|
| 137.944 | 137.677 |
| 133.590 | 129.723 |
| 127.752 | 122.268 |
| 77.547  | 77.230  |
| 76.912  | 73.319  |
| 64.387  | 58.081  |
| 19.314  |         |

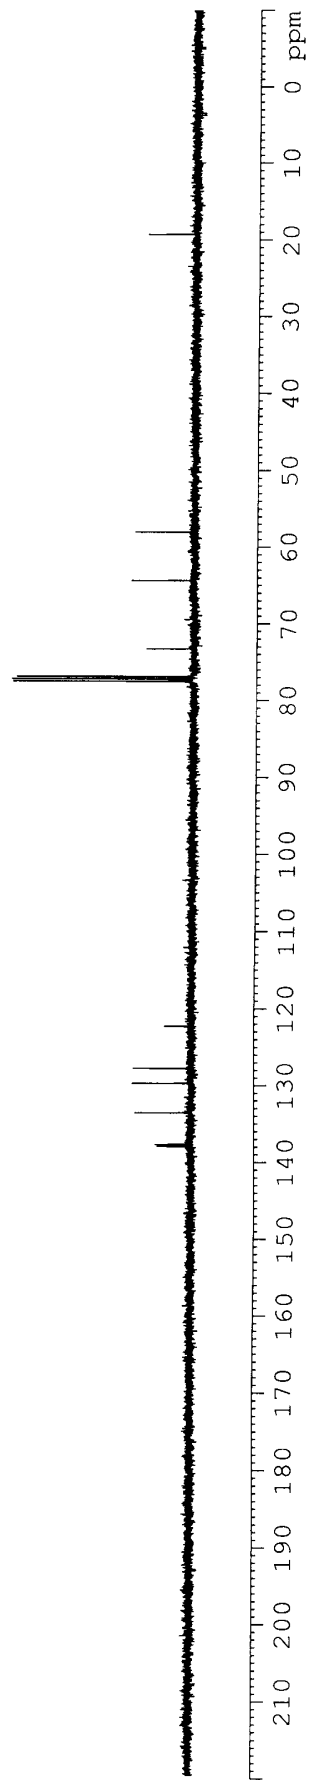

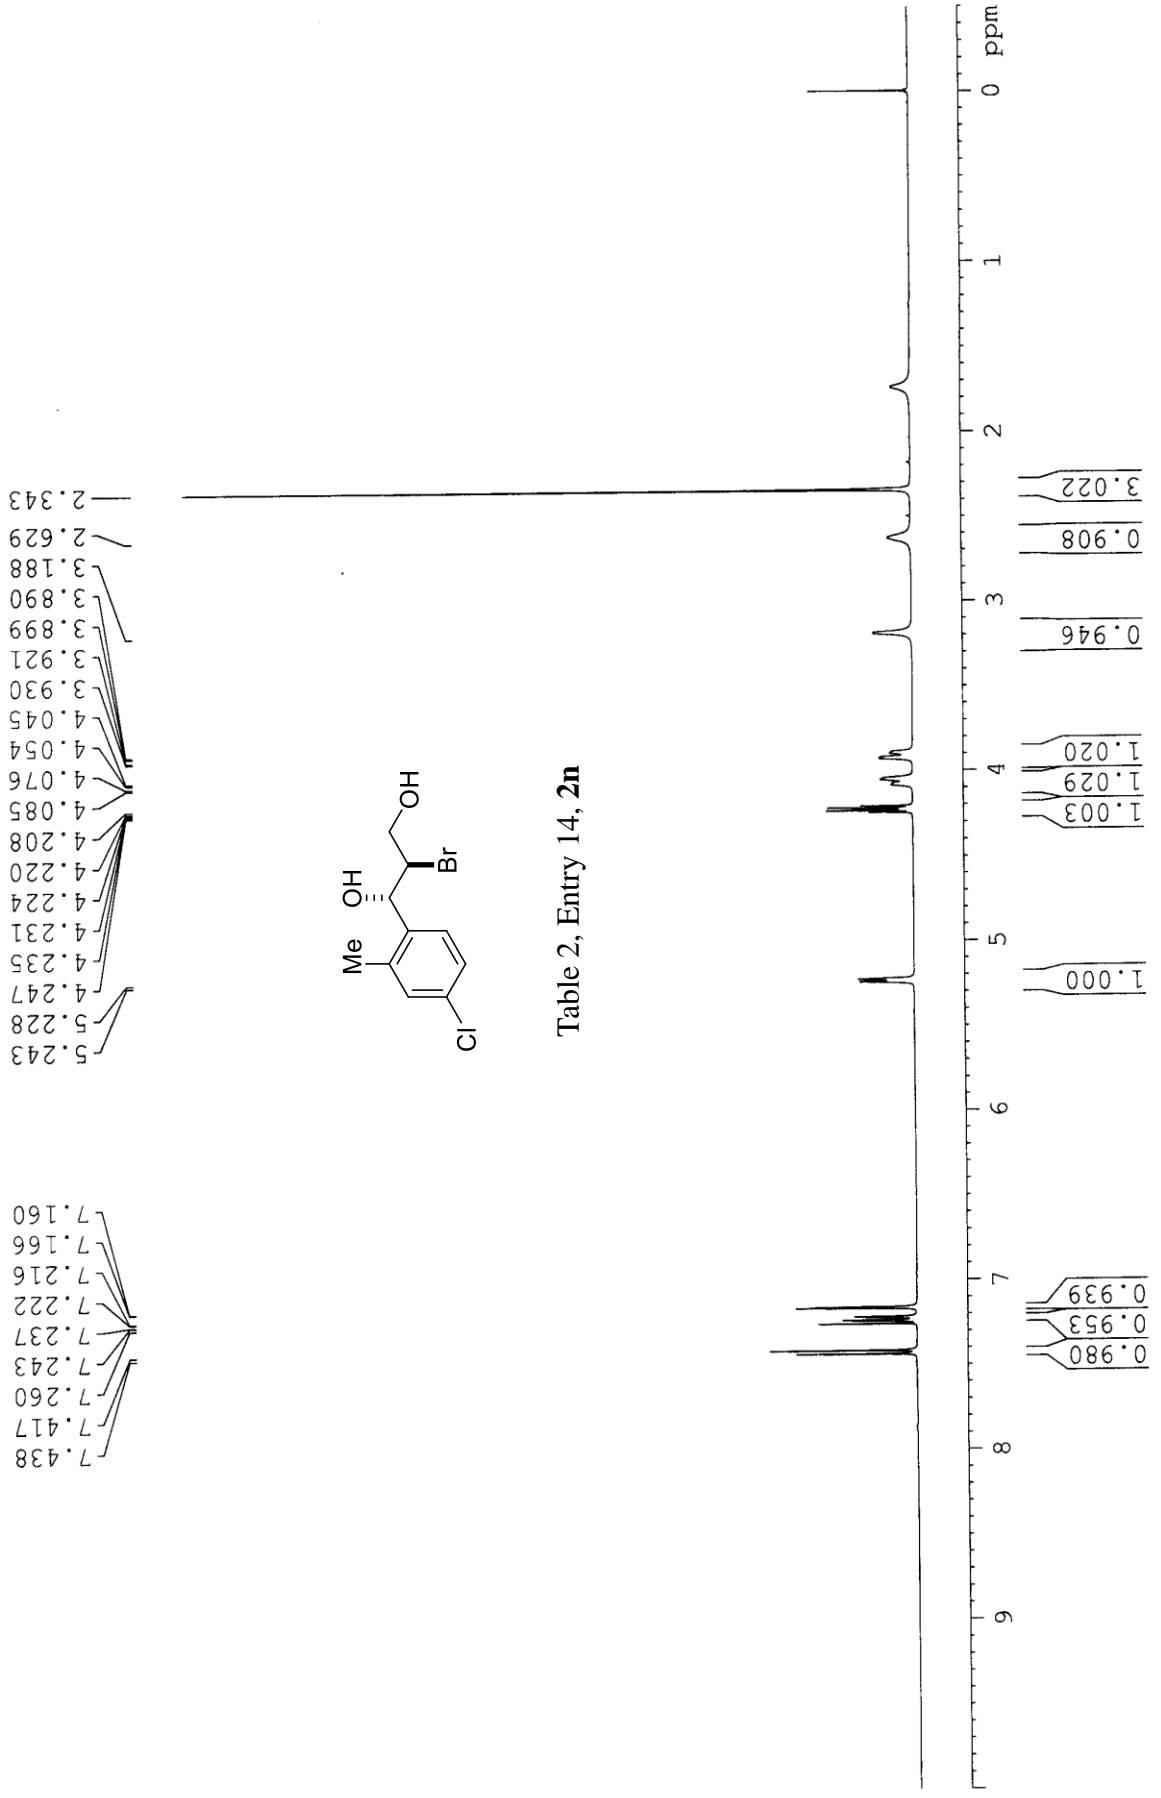



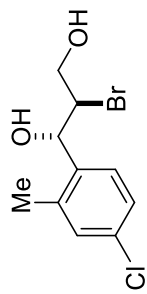Table 2, Entry 14, **2n**

|         |        |
|---------|--------|
| 137.410 | 19.369 |
| 137.366 |        |
| 133.929 |        |
| 130.647 |        |
| 127.448 |        |
| 126.738 |        |
| 77.549  |        |
| 77.231  |        |
| 76.913  |        |
| 73.201  |        |
| 64.368  |        |
| 58.014  |        |

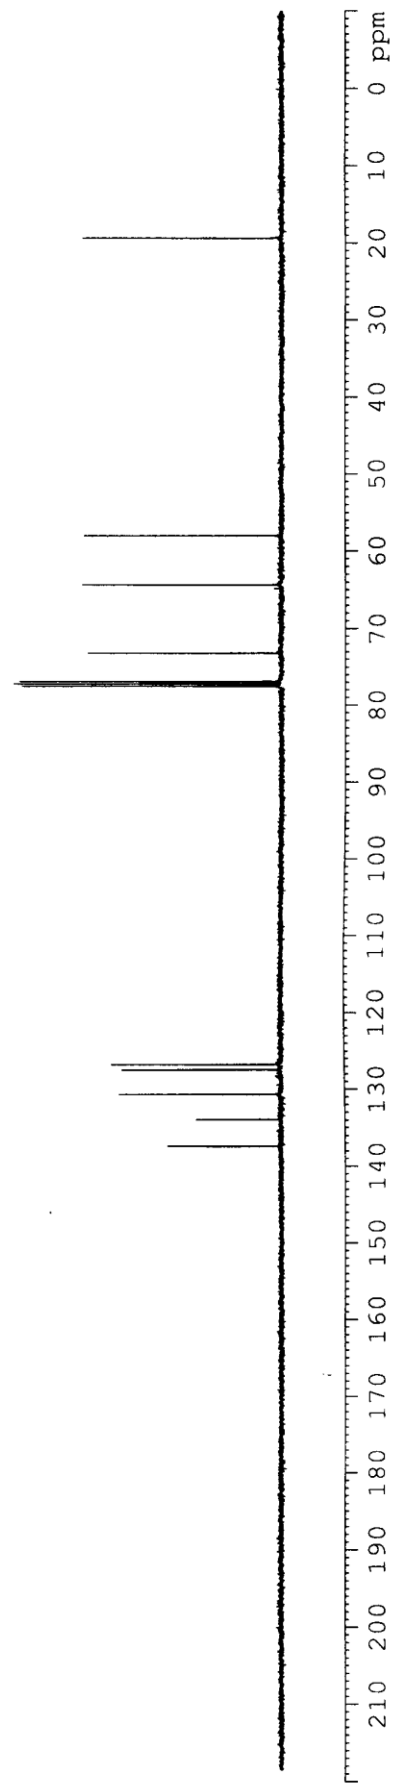

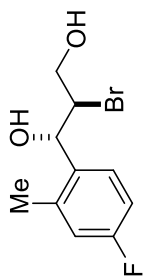

Table 2, Entry 15, 20

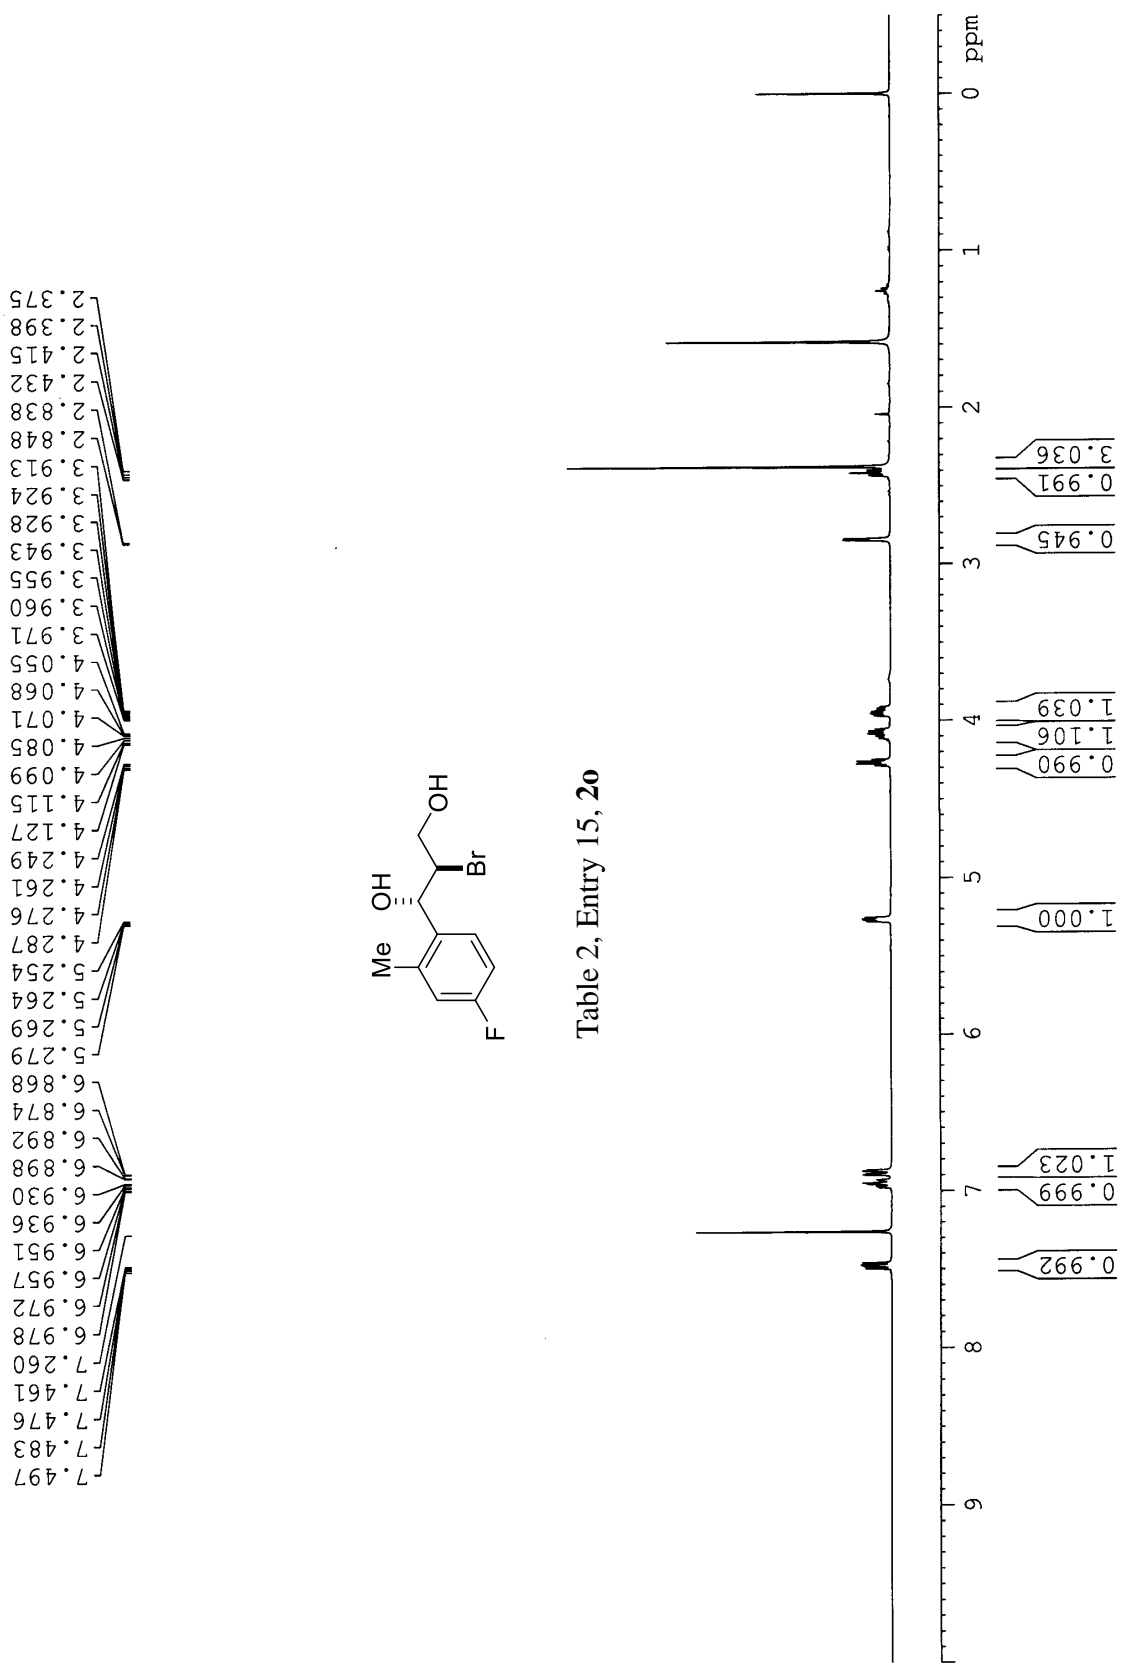

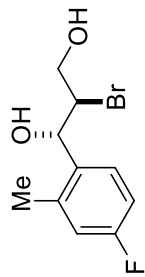

Table 2, Entry 15, 20

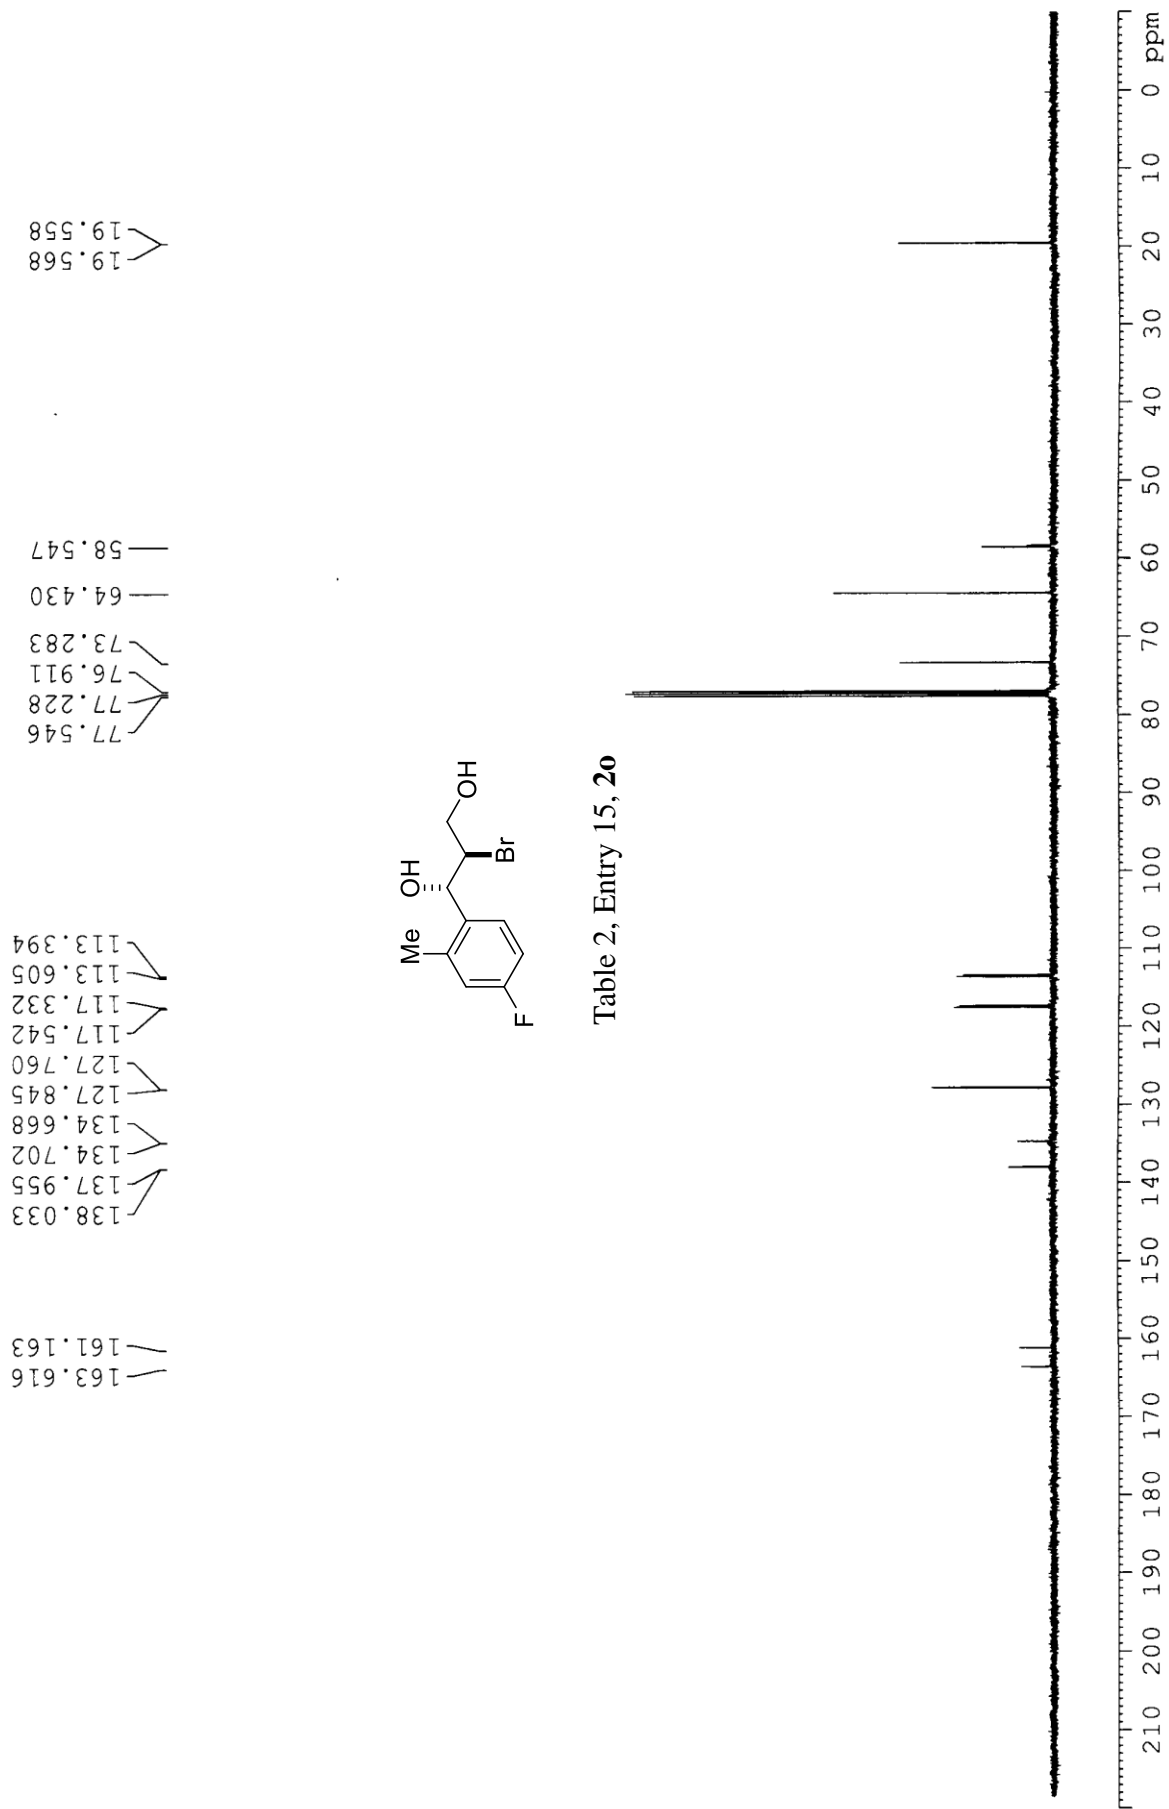

7.570  
7.561  
7.500  
7.495  
7.480  
7.475  
7.463  
7.461  
7.457  
7.443  
7.440  
7.428  
7.424  
7.406  
7.402  
7.379  
7.376  
7.372  
7.363  
7.357  
7.352  
7.342  
7.339  
7.336  
7.260  
5.345  
5.335  
5.330  
5.320  
4.346  
4.334  
4.331  
4.322  
4.319  
4.308  
4.142  
4.129  
4.111  
4.097  
4.084  
3.990  
3.975  
3.963  
3.944  
3.933  
3.222  
3.215  
2.777  
2.761  
2.746  
2.432

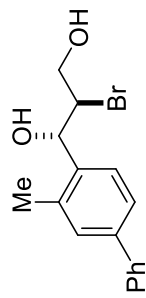

Table 2, Entry 16, 2p

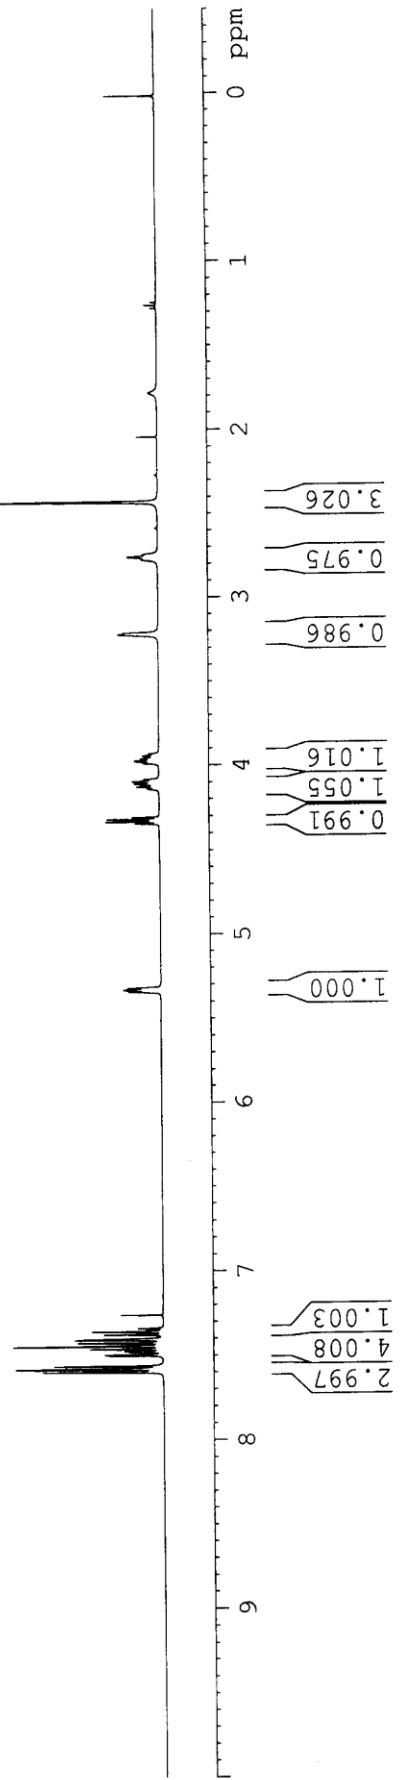

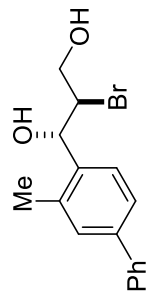

Table 2, Entry 16, 2p

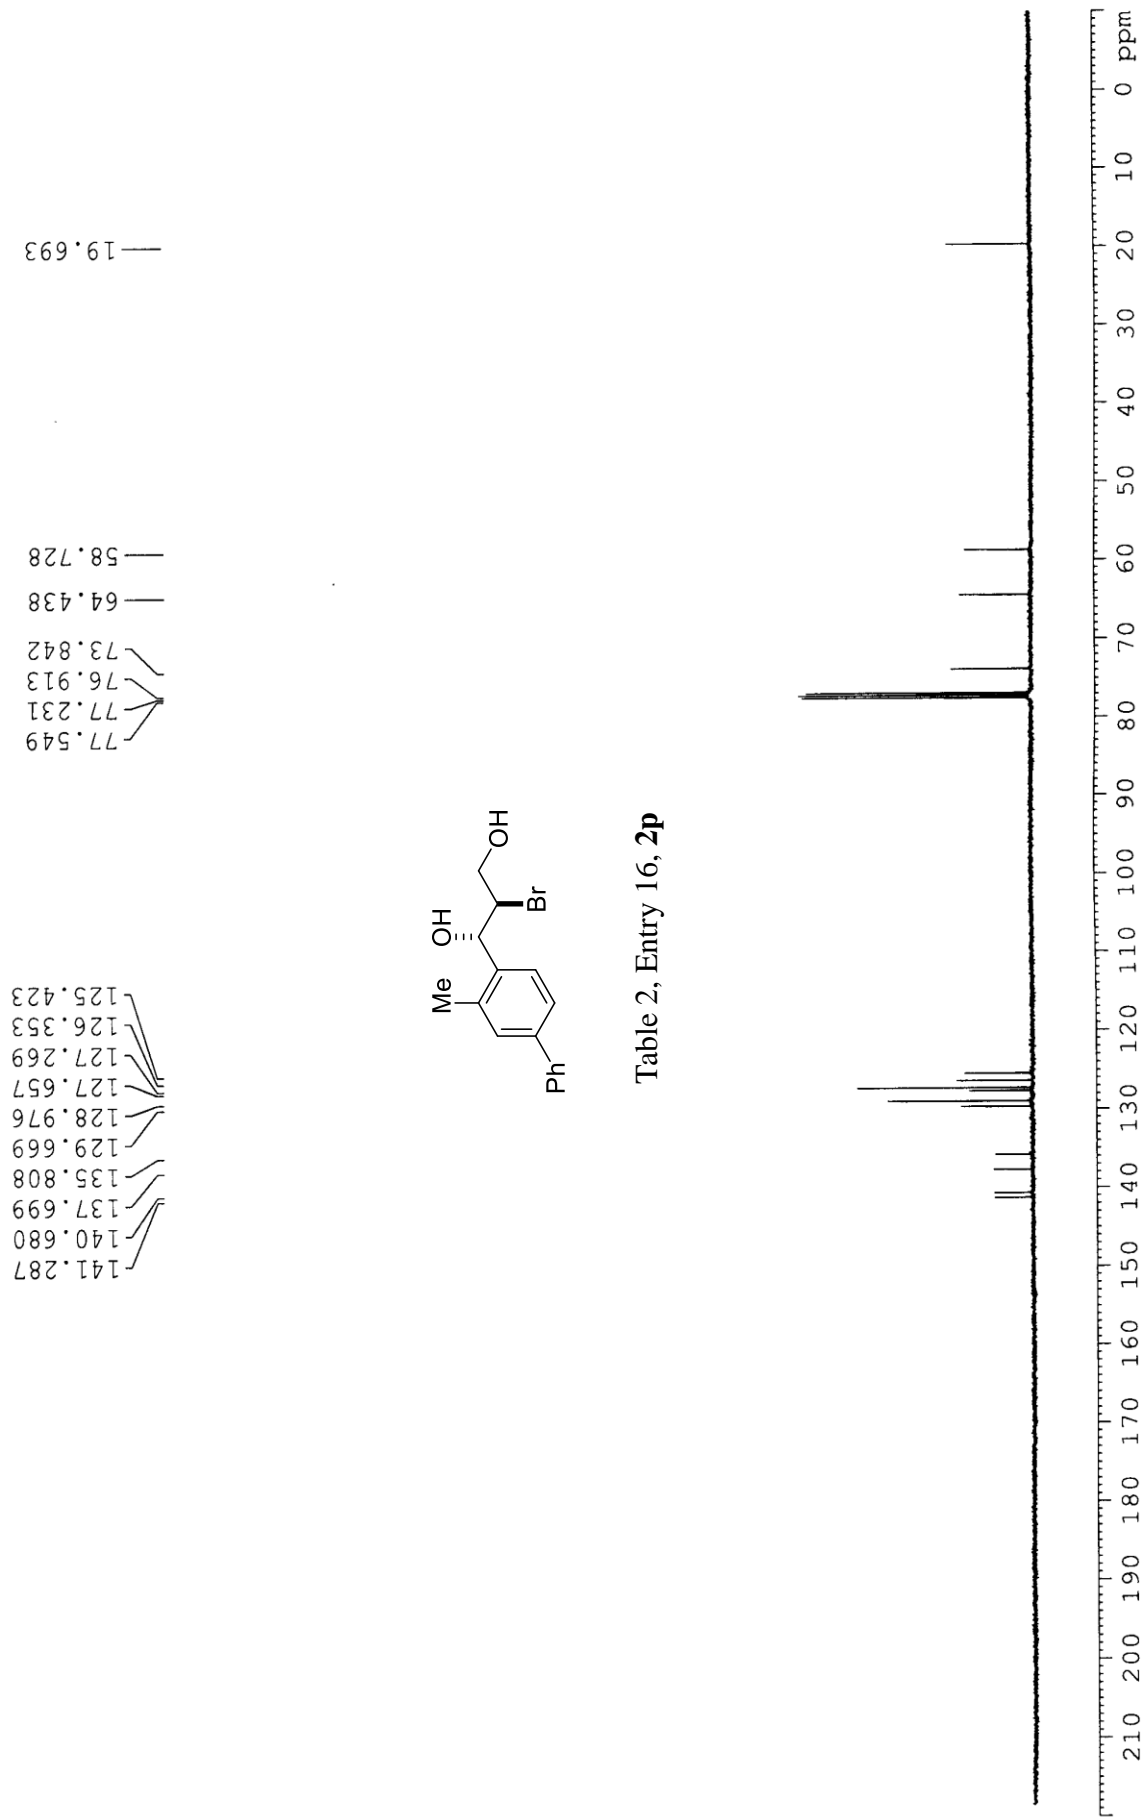

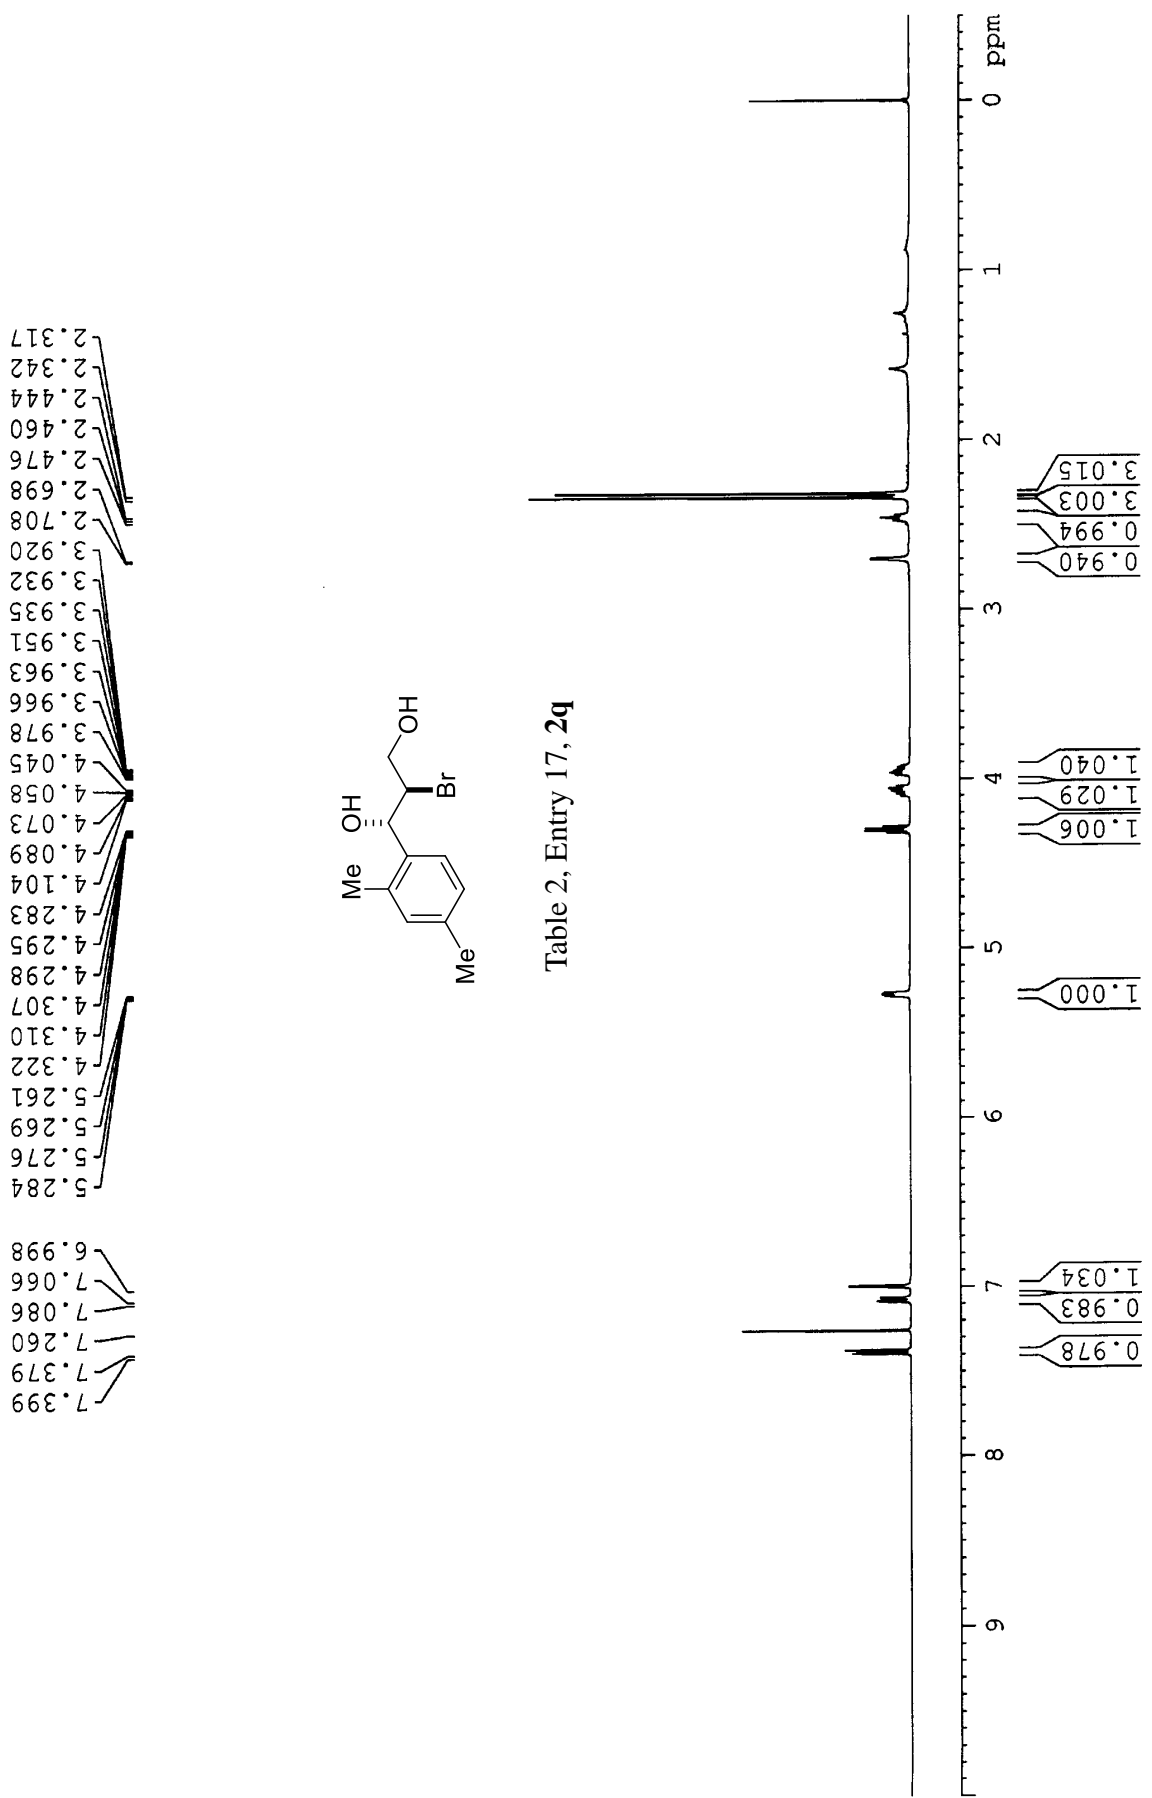

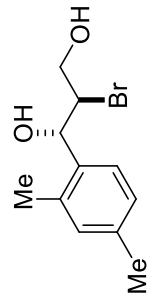

Table 2, Entry 17, 2q

19.243  
21.077

58.625  
64.312  
73.616  
76.748  
77.066  
77.383

125.537  
127.238  
131.512  
135.087  
135.645  
138.047

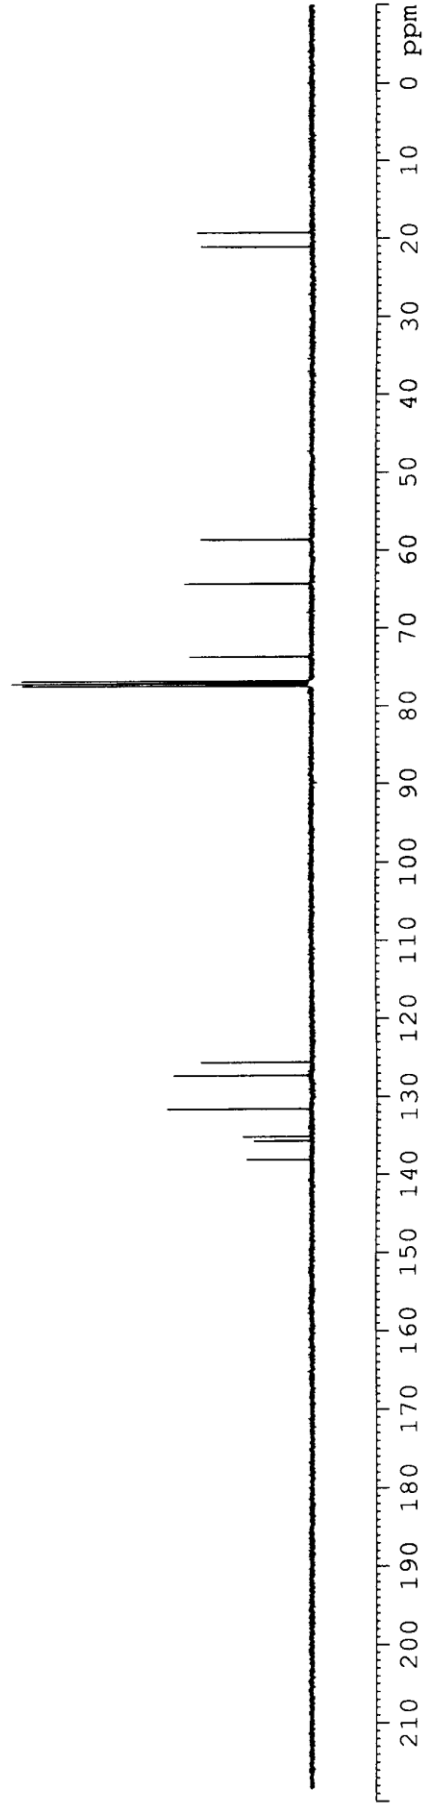

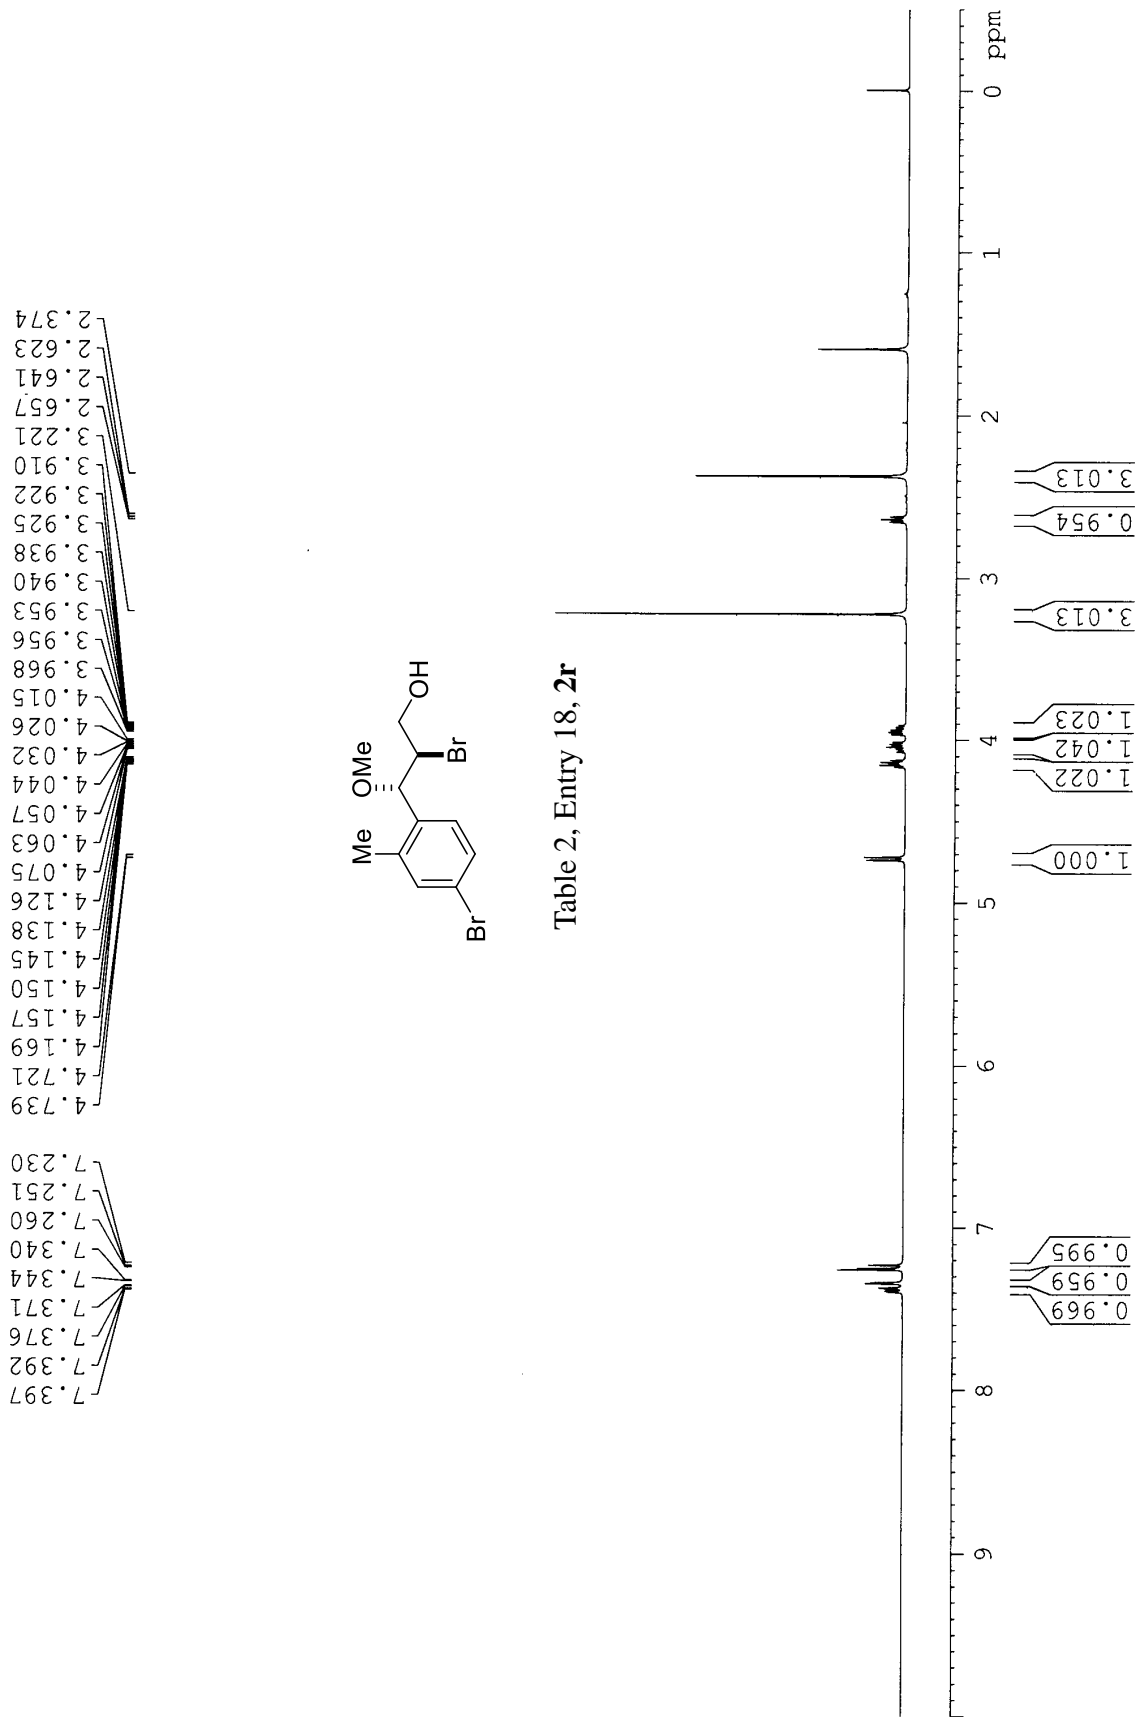



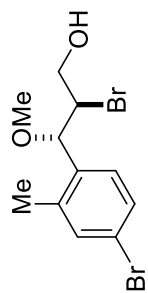Table 2, Entry 18, **2r**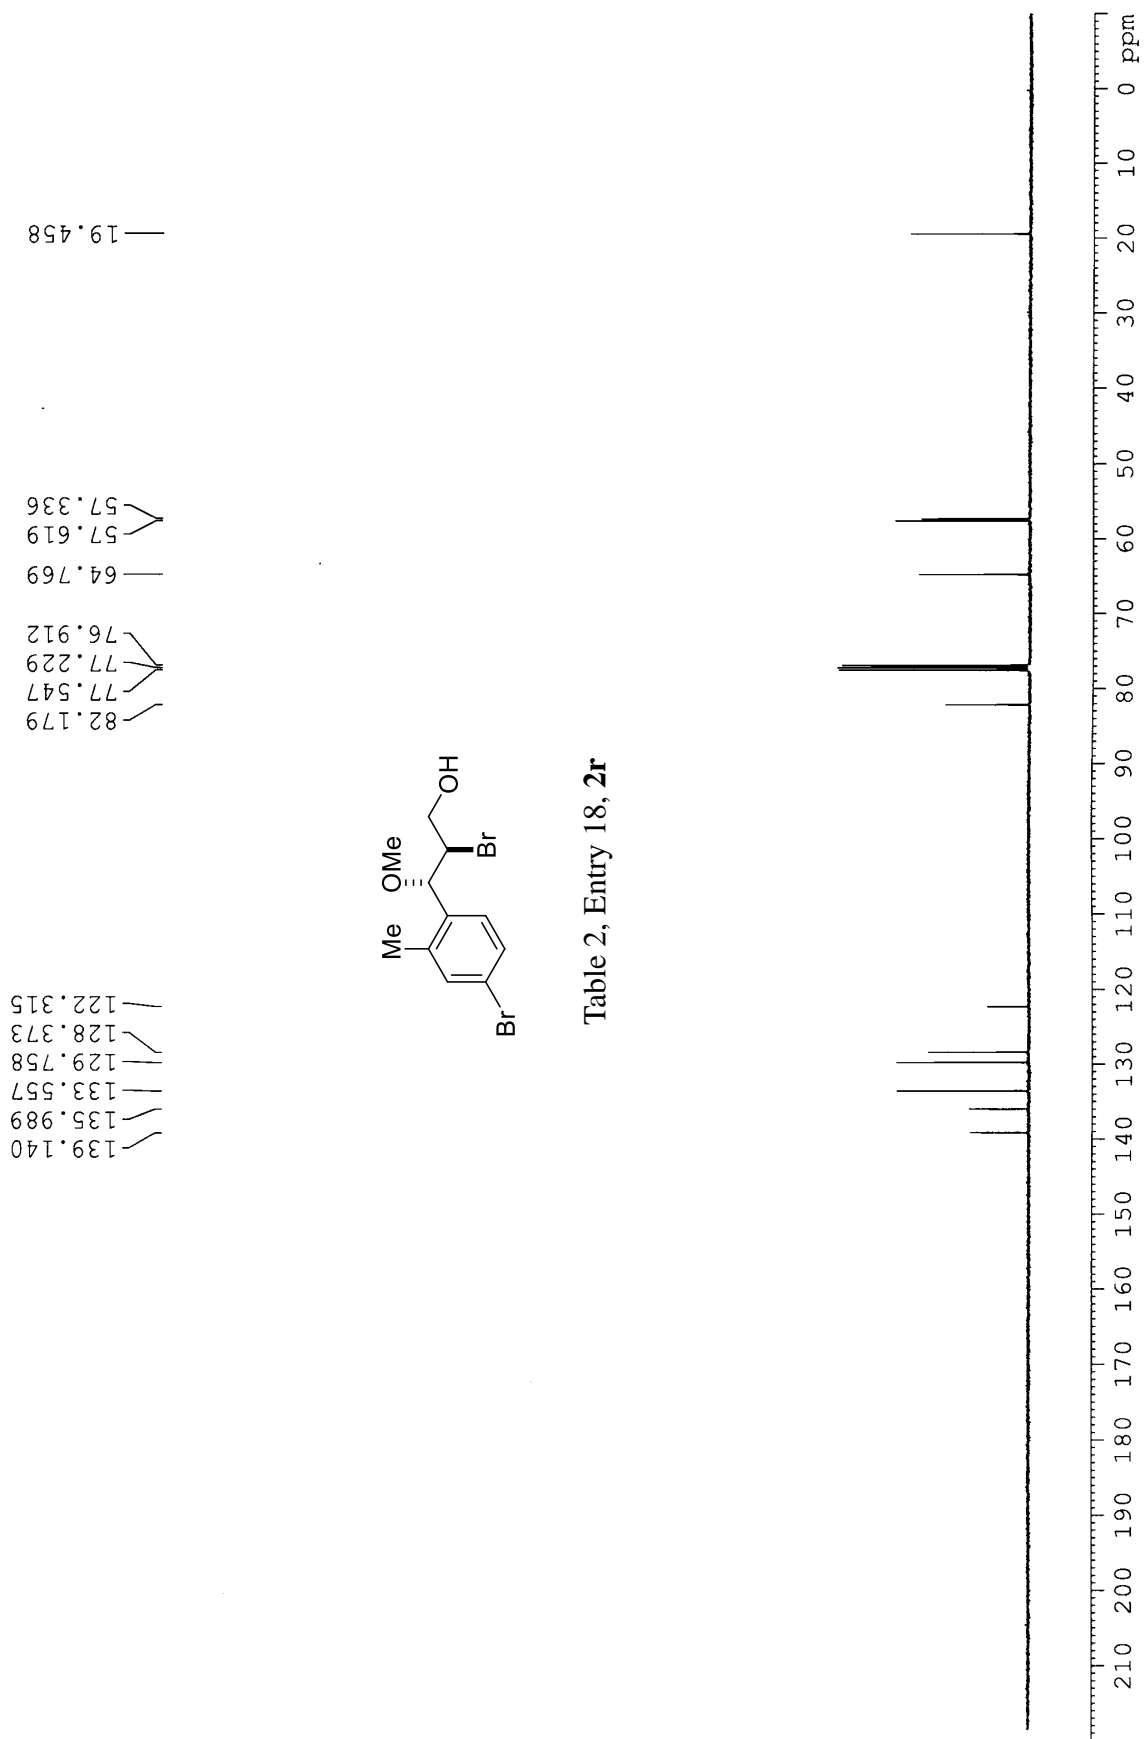

3.406  
 3.458  
 3.605  
 3.620  
 3.631  
 3.647  
 3.771  
 3.784  
 3.797  
 3.810  
 4.242  
 4.255  
 4.257  
 4.270  
 4.272  
 4.285  
 4.958  
 4.973

7.260  
 7.266  
 7.279  
 7.283  
 7.288  
 7.483  
 7.489  
 7.494  
 7.506  
 7.510  
 7.516

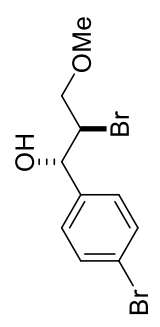

Table 2, Entry 19, 2s

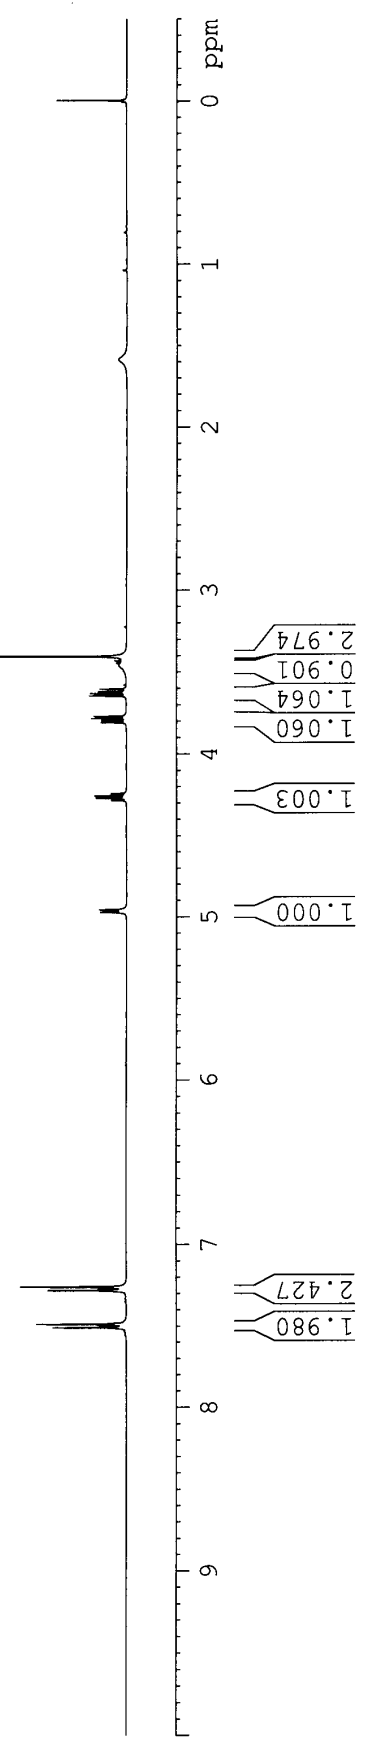

— 54.857  
 — 59.444  
 — 74.387  
 — 76.220  
 — 76.912  
 — 77.230  
 — 77.547

— 122.353  
 — 128.686  
 — 131.656  
 — 139.512

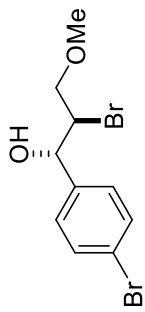

Table 2, Entry 19, 2s

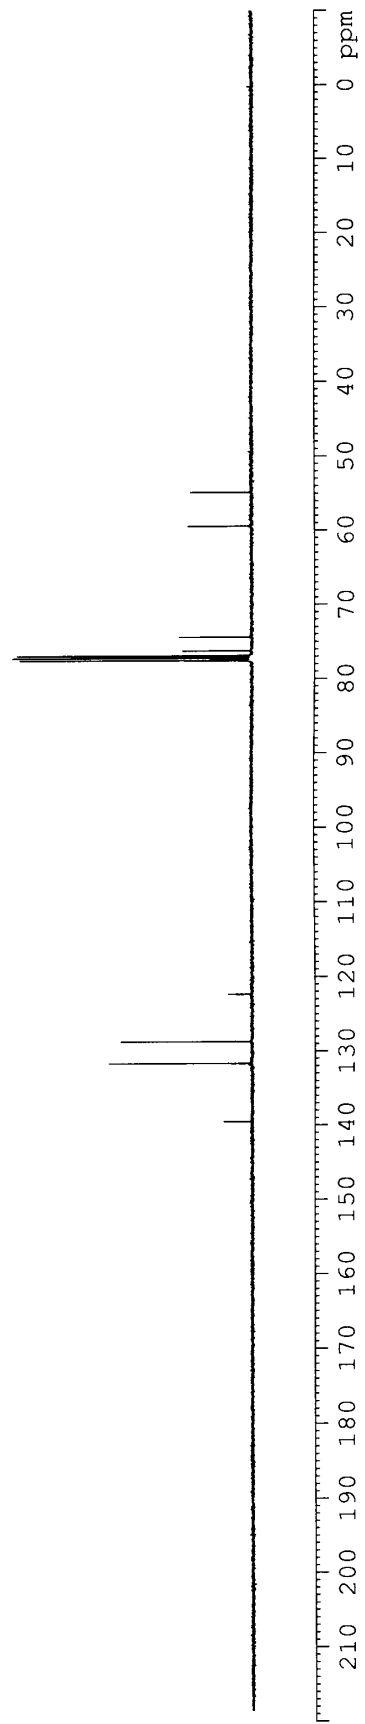

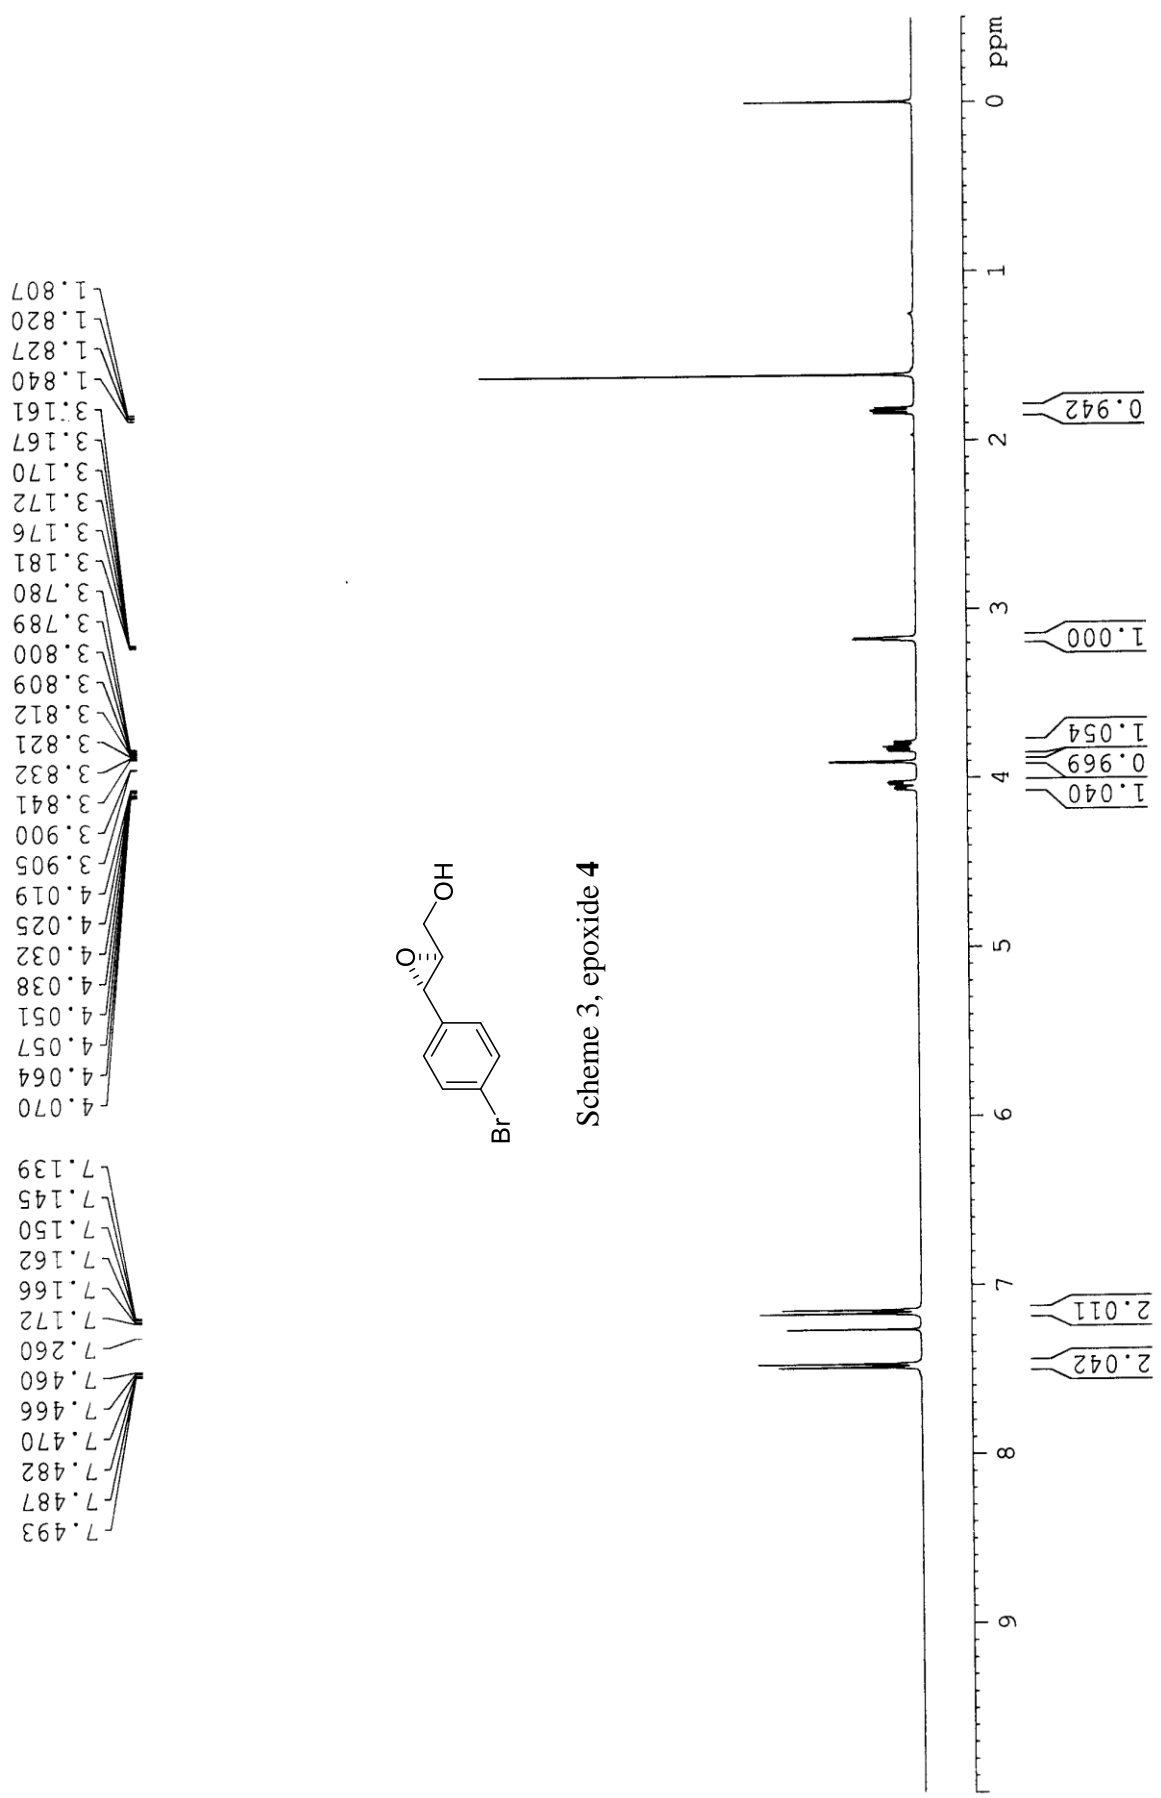

— 55.138  
— 61.176  
— 62.692  
— 76.914  
— 77.231  
— 77.549

— 122.399  
— 127.558  
— 131.869  
— 135.974

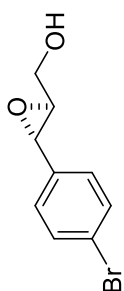

Scheme 3, epoxide 4

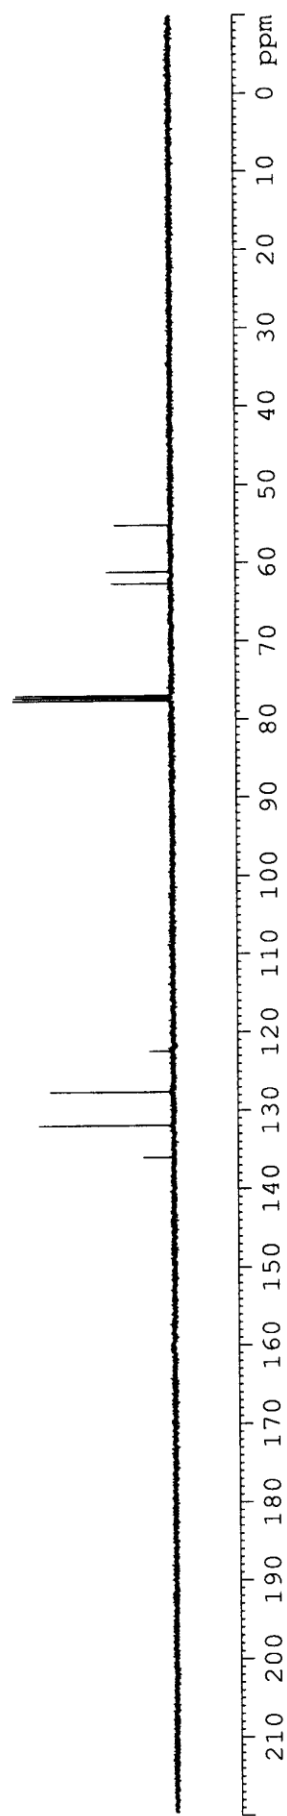

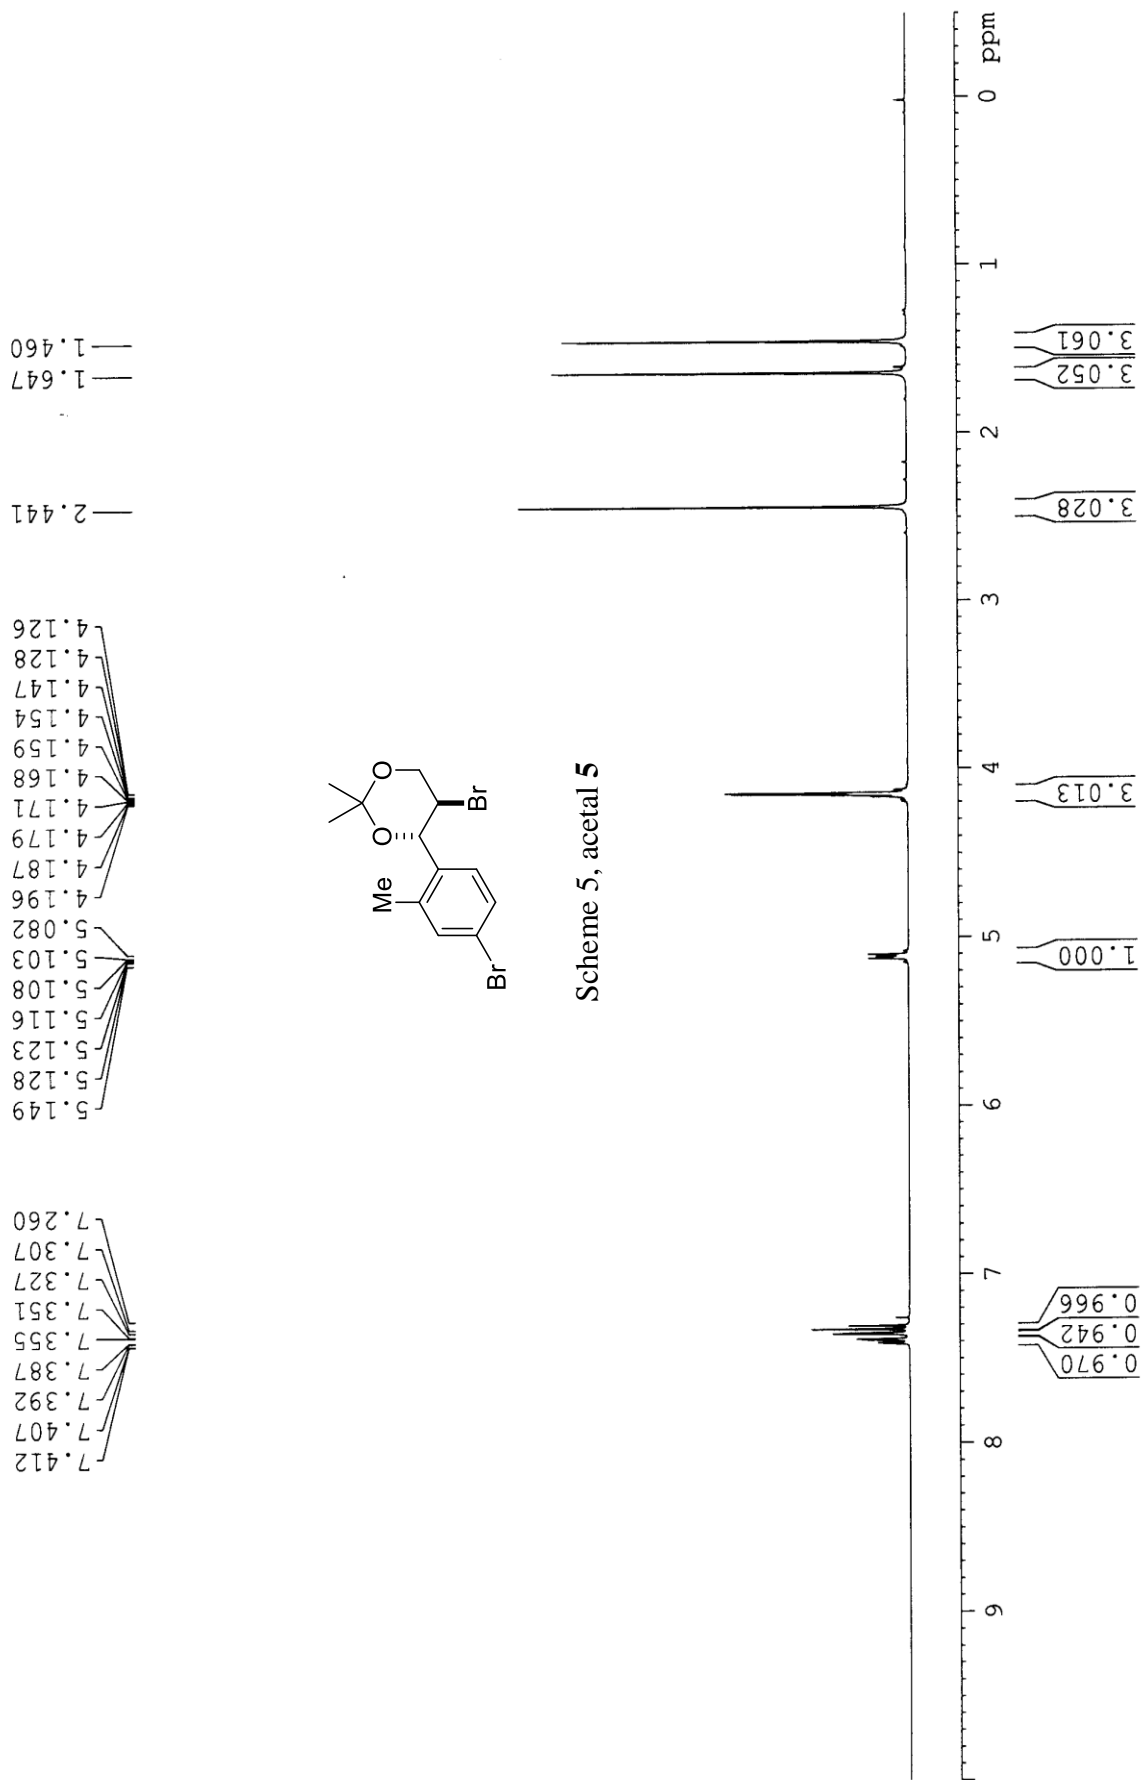

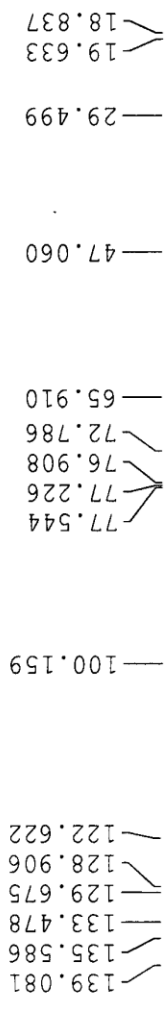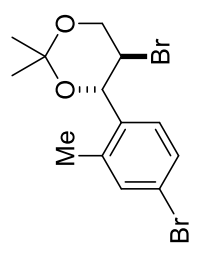

Scheme 5, acetal **5**

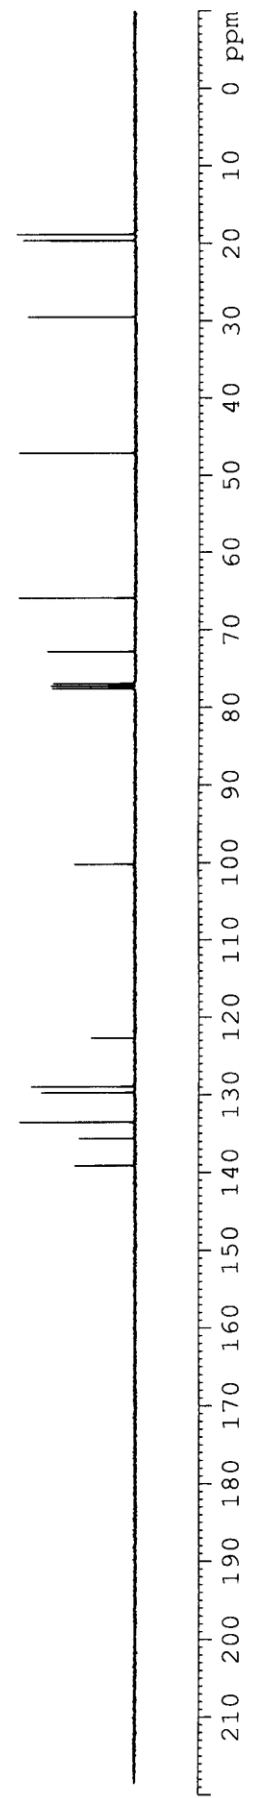

7.312  
 7.308  
 7.303  
 7.293  
 7.288  
 7.283  
 7.277  
 7.275  
 7.269  
 7.265  
 7.260  
 7.254  
 7.253  
 7.246  
 7.243  
 7.242  
 7.235  
 7.232  
 7.230  
 7.228  
 7.220  
 7.216  
 7.211  
 7.206  
 4.494  
 4.474  
 4.070  
 4.061  
 4.052  
 4.045  
 4.043  
 4.036  
 4.027  
 4.017  
 3.884  
 3.875  
 3.868  
 3.856  
 3.847  
 3.839  
 3.831  
 3.782  
 3.768  
 3.754  
 3.740  
 3.726  
 2.396  
 2.386  
 2.244  
 2.049  
 2.034  
 2.019

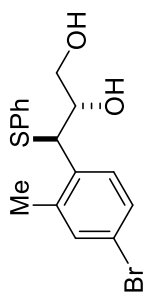

Scheme 5, sulfide **6**

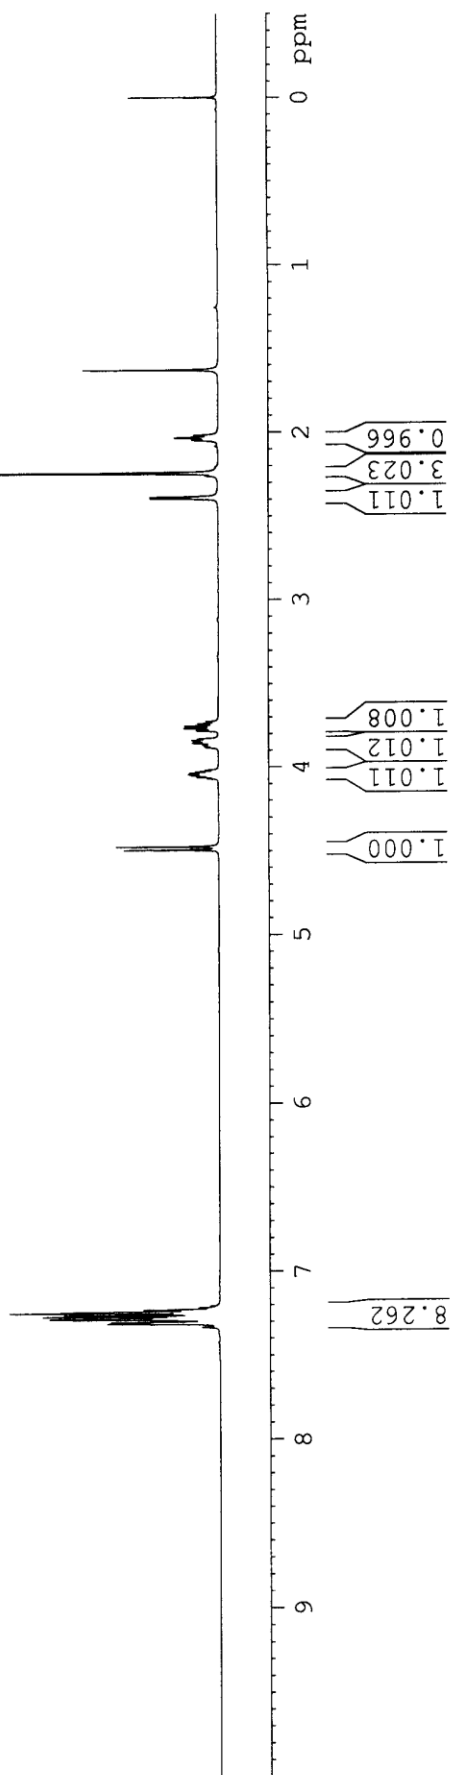



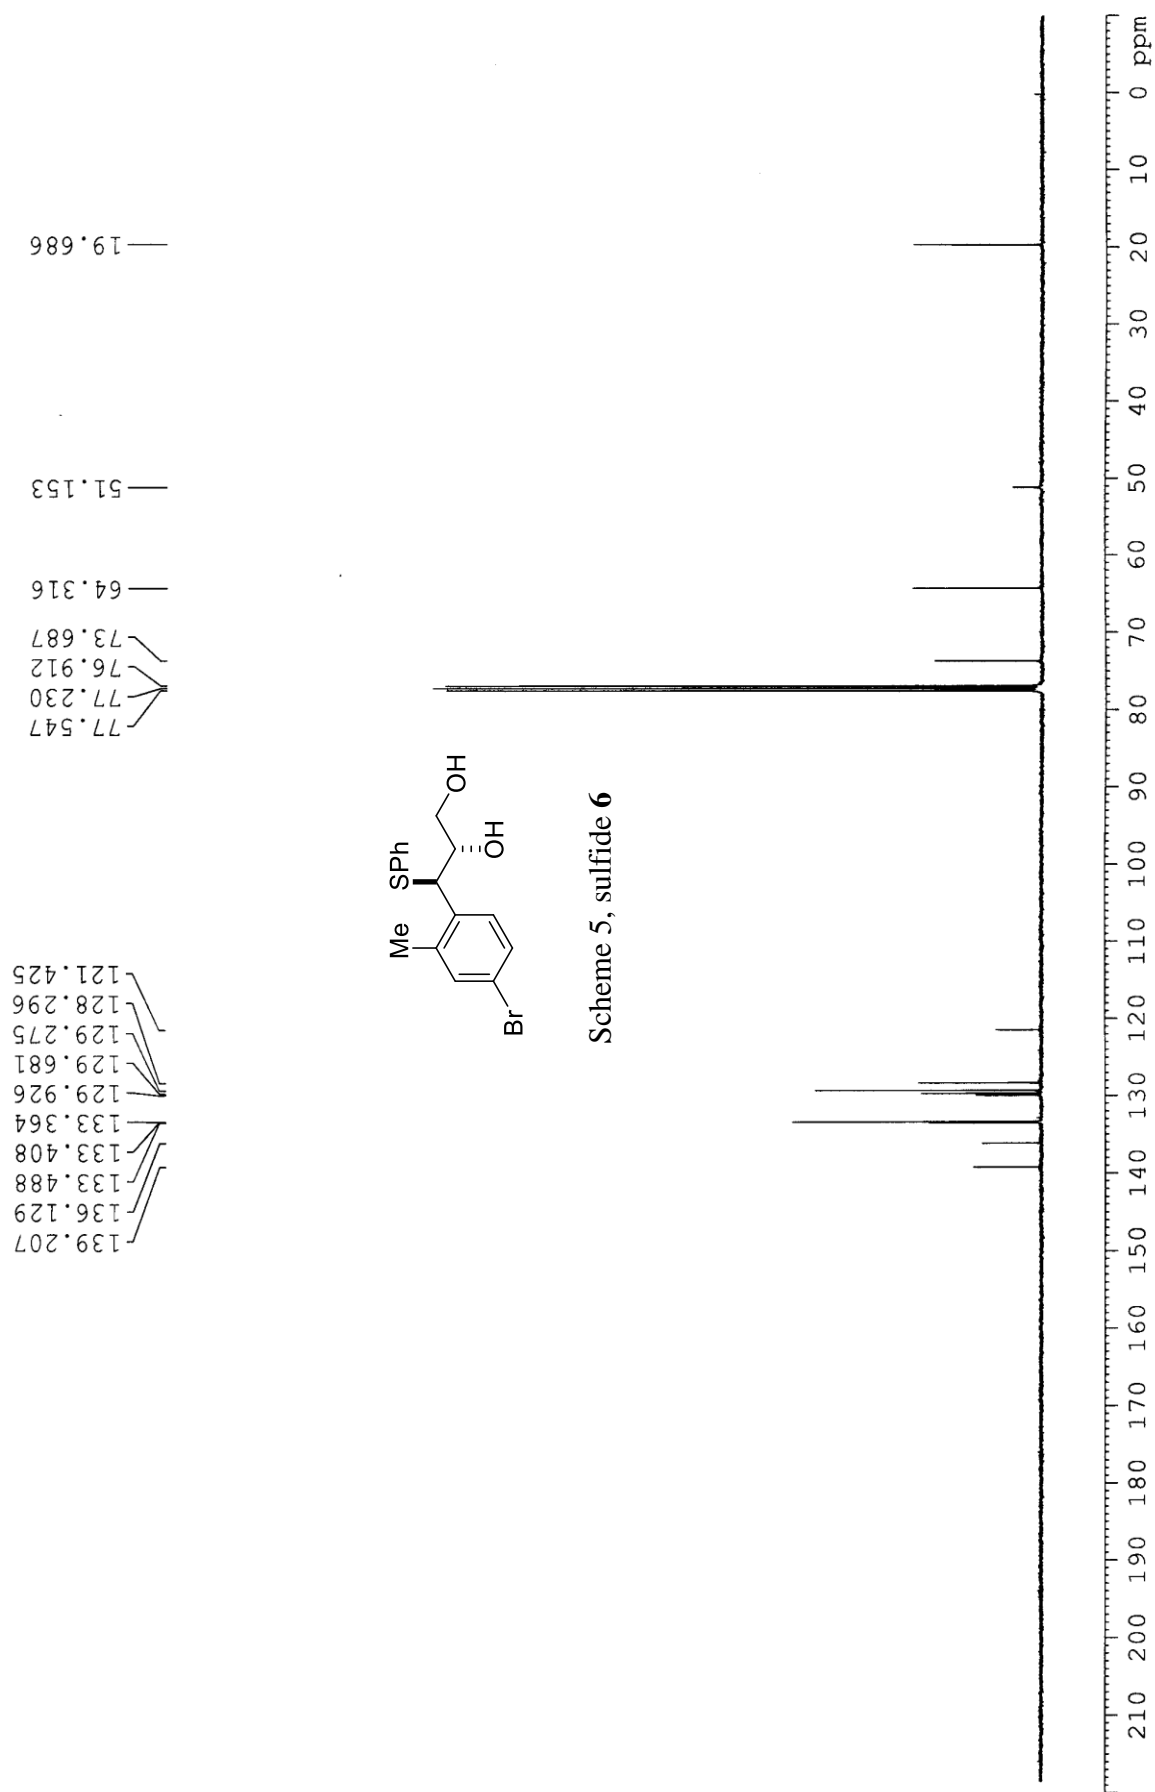

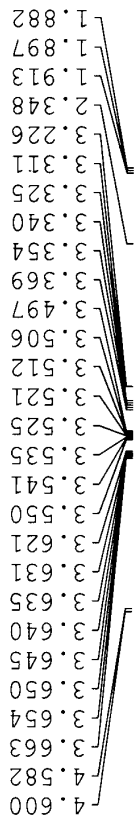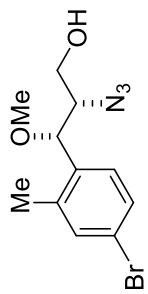

Scheme 6, azide 7

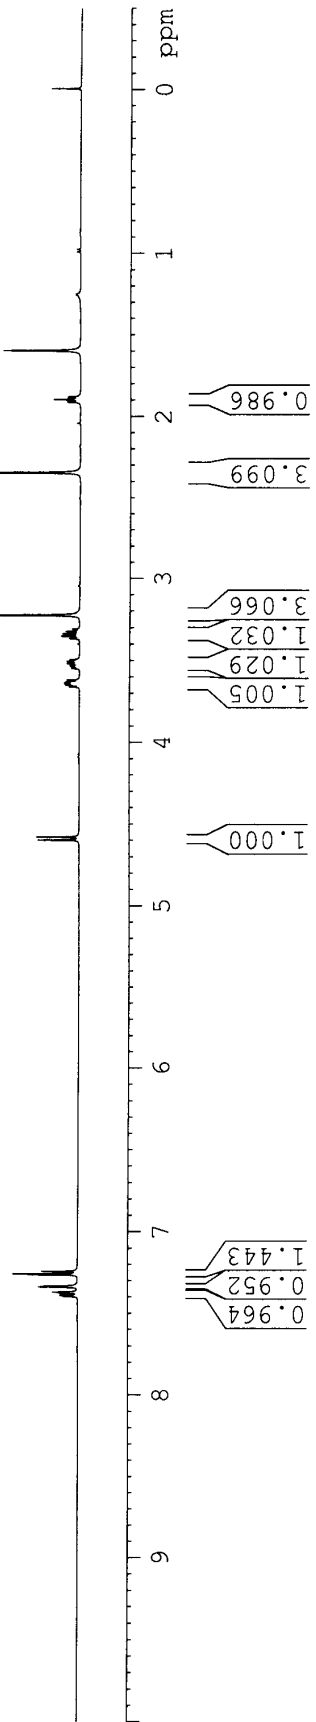

138.932  
 135.279  
 133.702  
 129.896  
 129.046  
 122.345  
 80.618  
 77.546  
 77.229  
 76.911  
 67.800  
 62.130  
 56.903  
 19.260

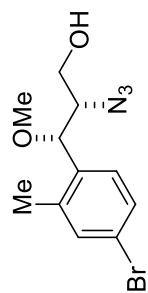

Scheme 6, azide 7

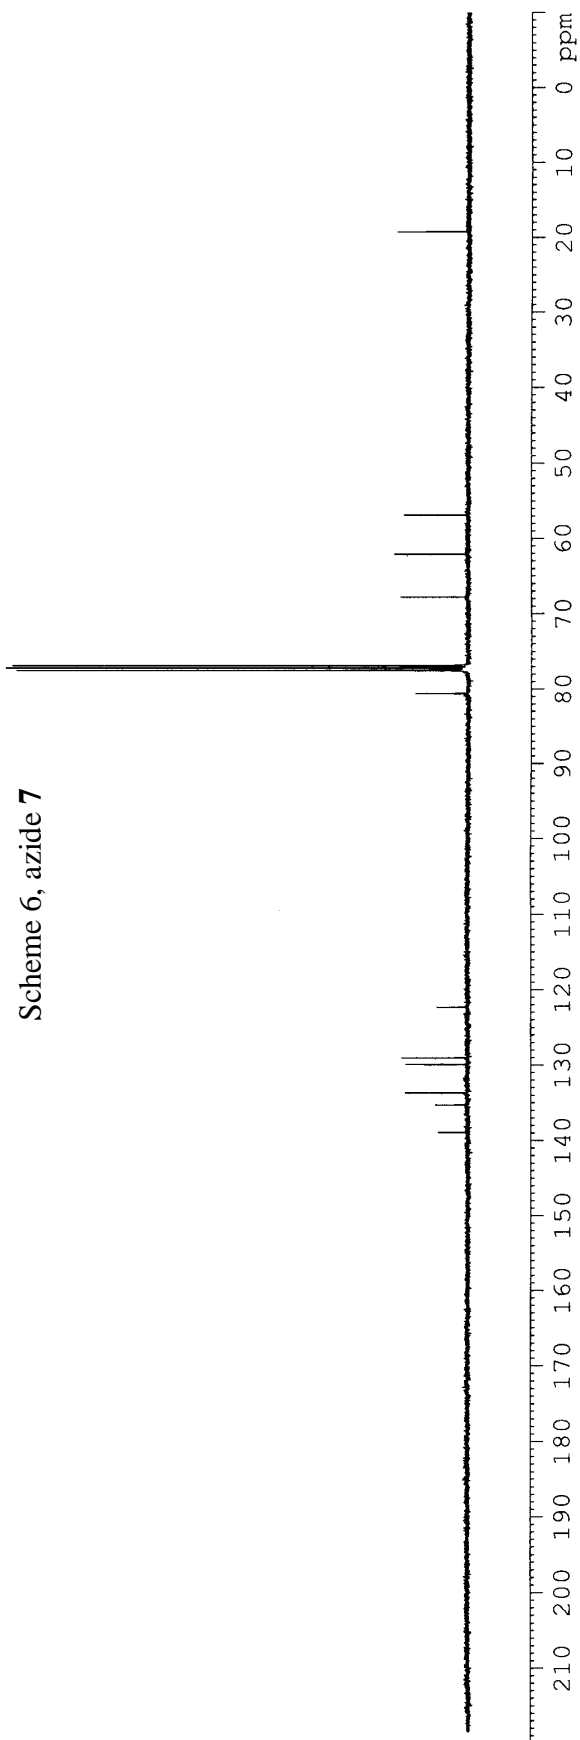

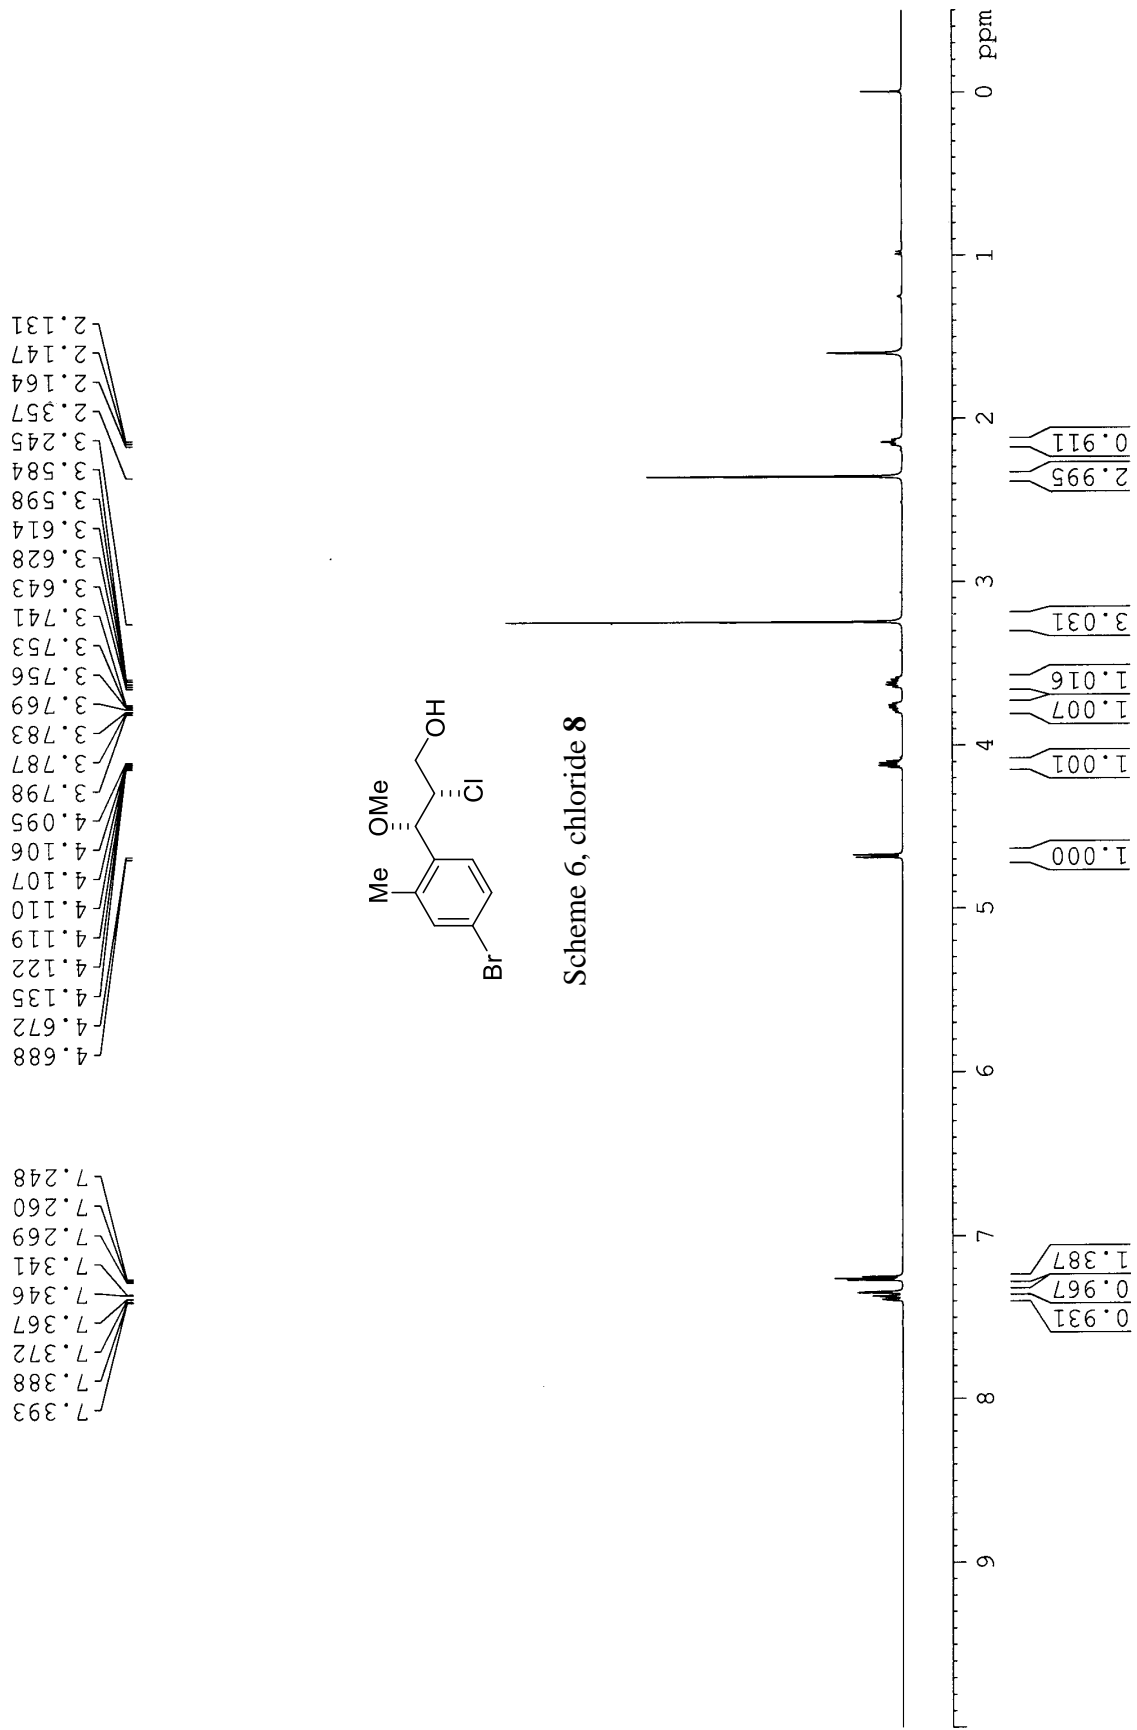

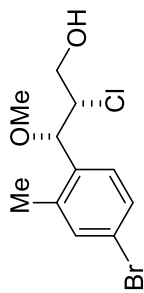Scheme 6, chloride **8**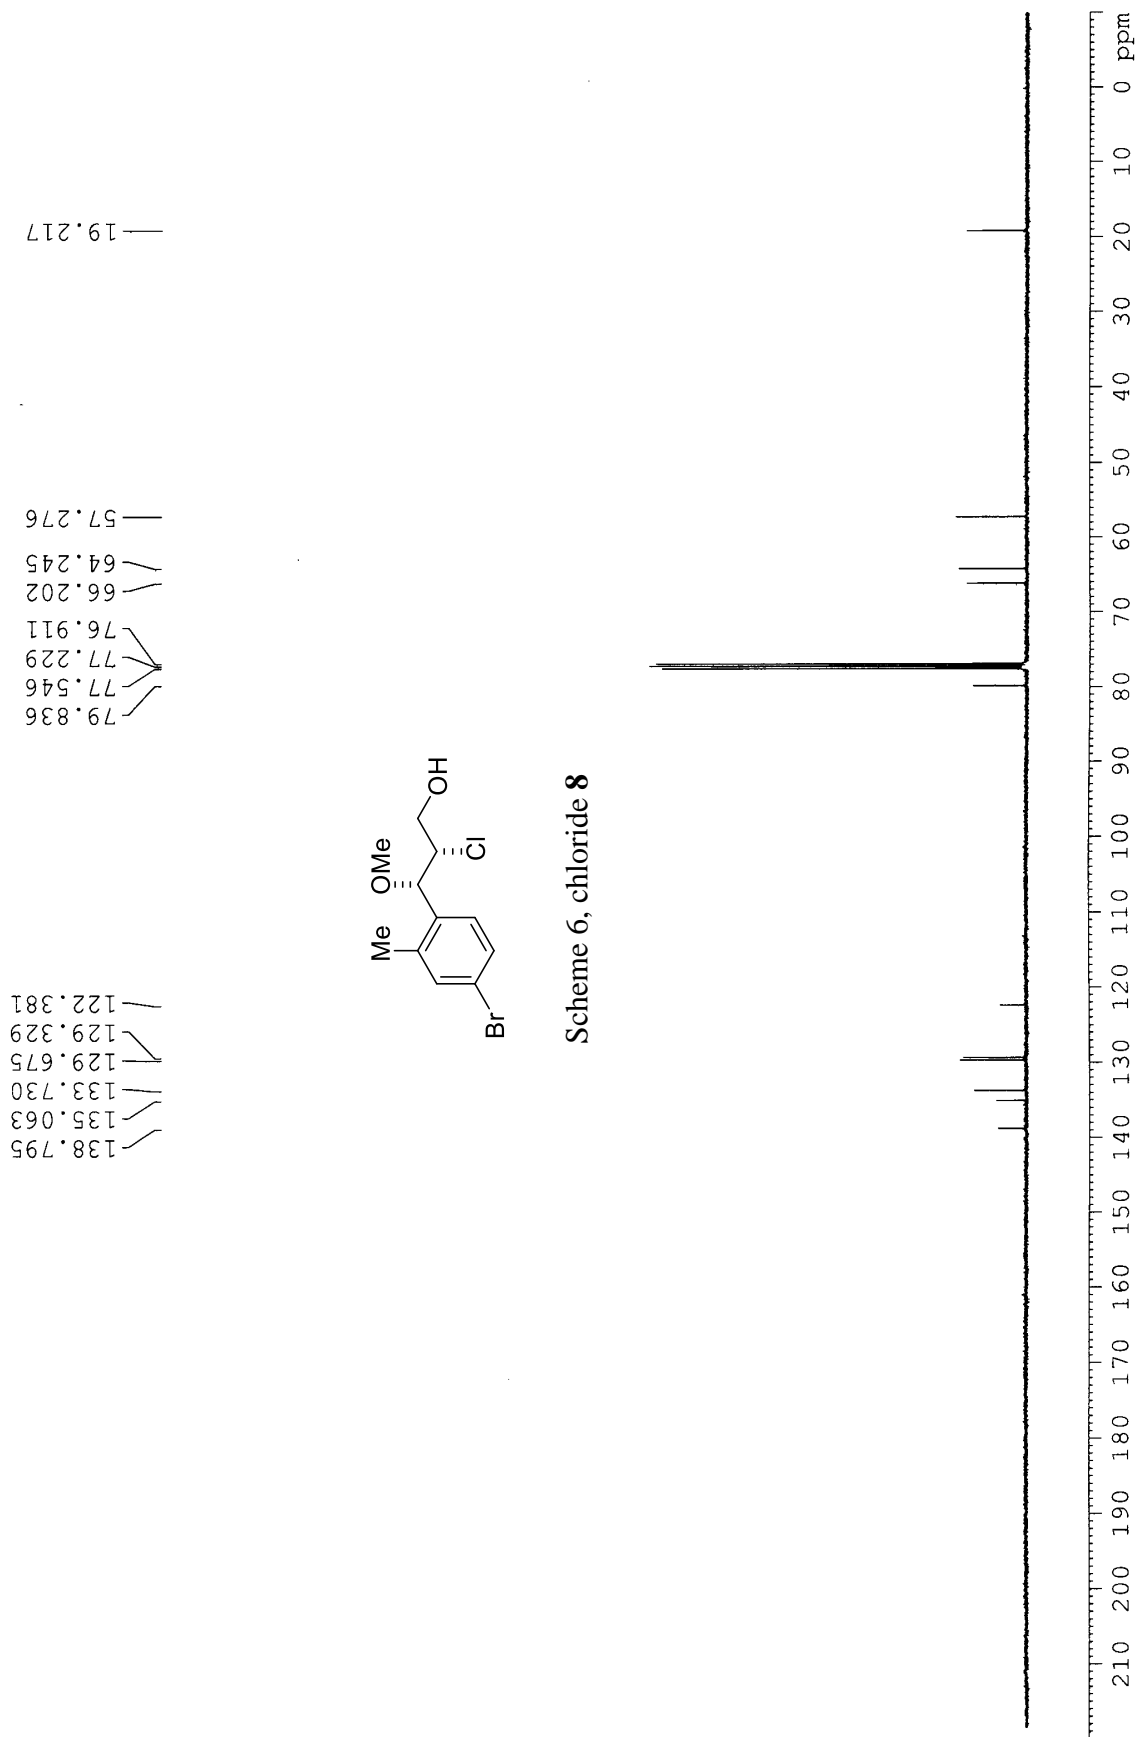

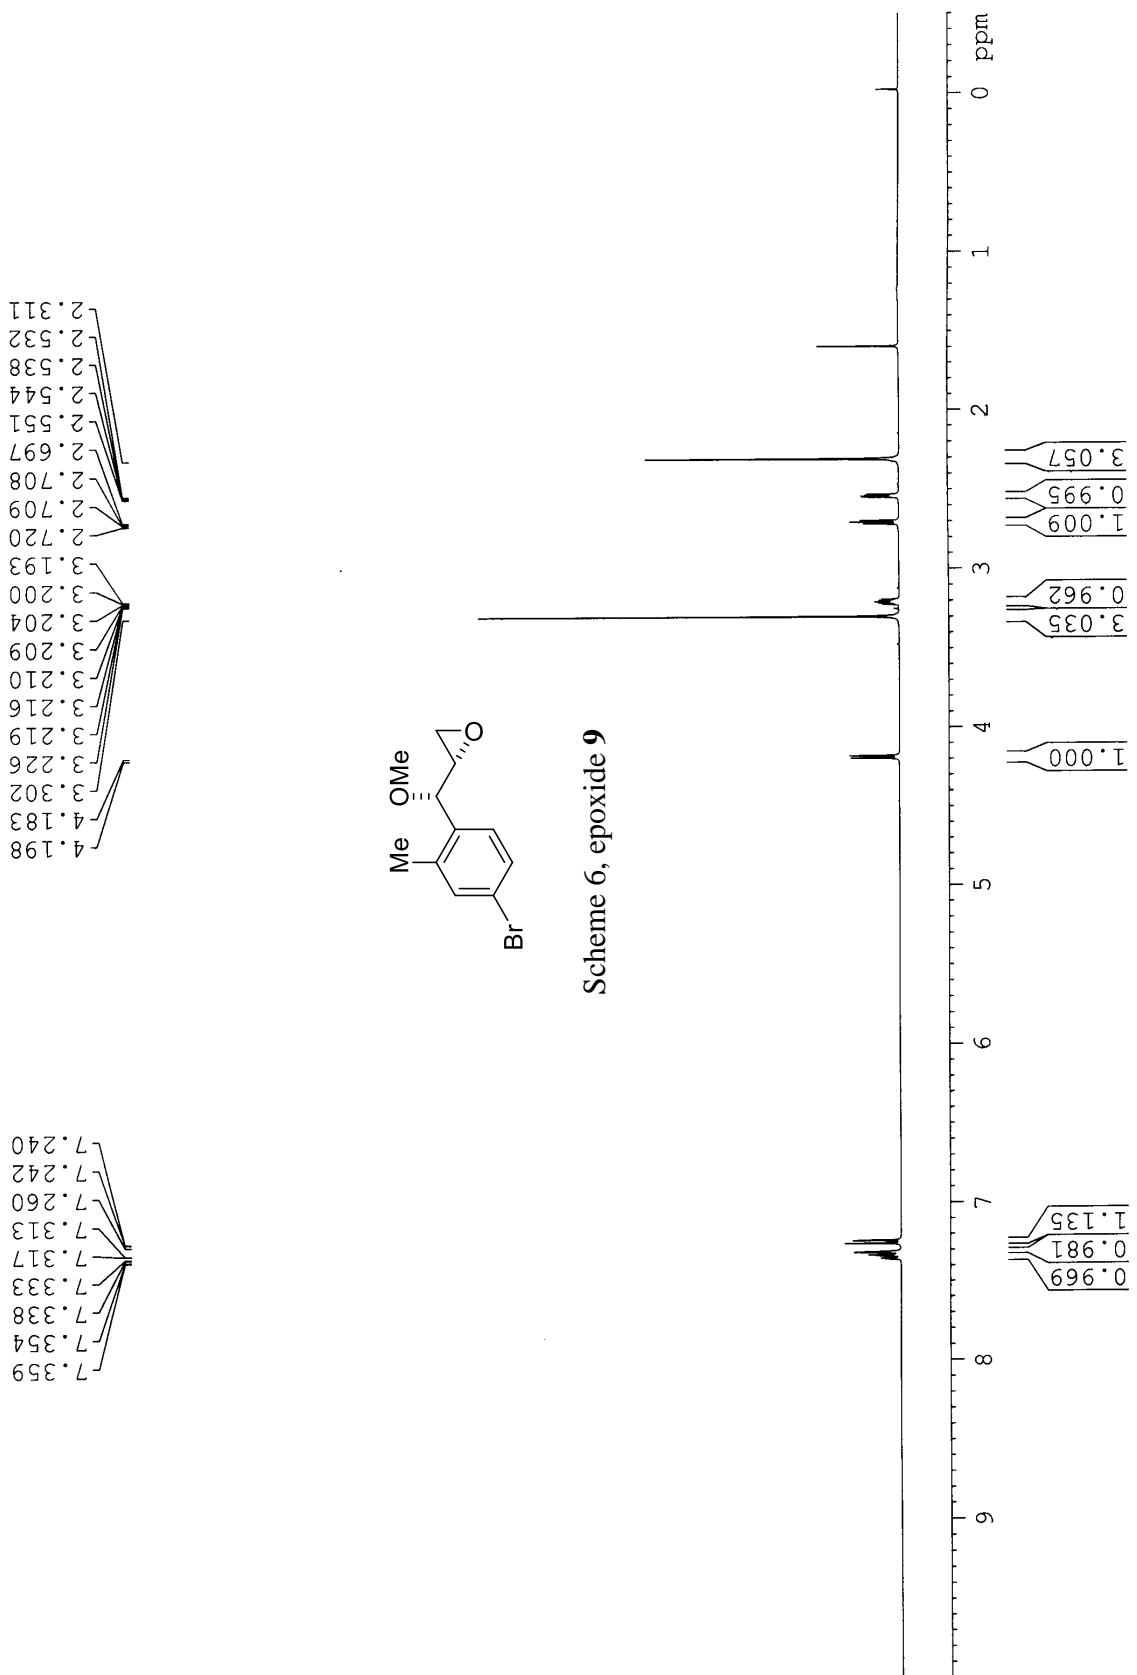

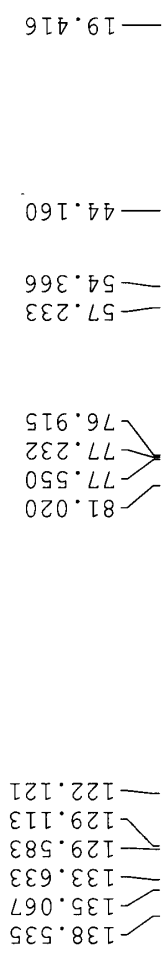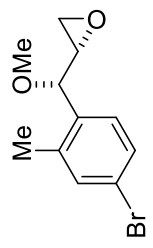

Scheme 6, epoxide **9**

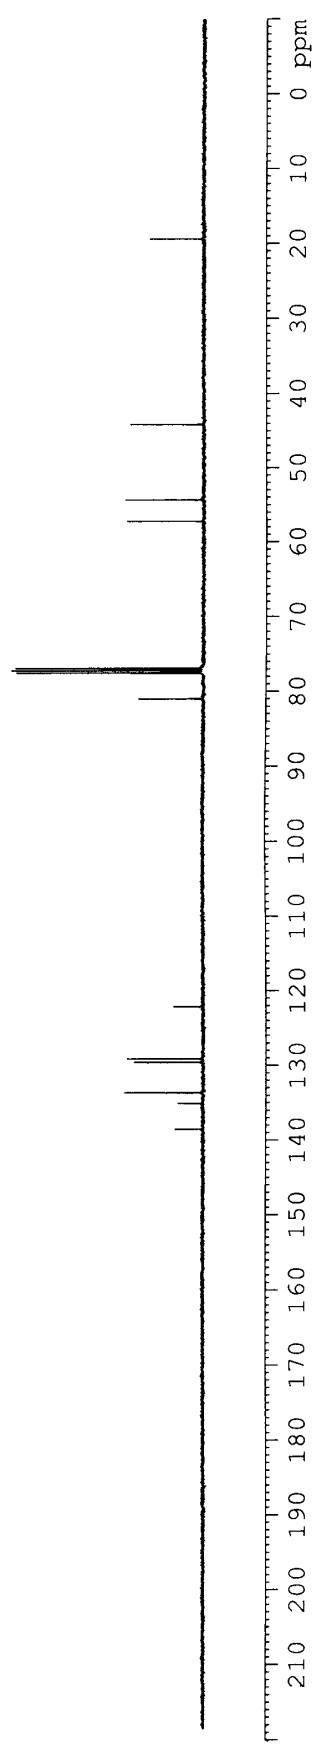

7.357  
 7.352  
 7.337  
 7.332  
 7.317  
 7.313  
 7.260  
 7.251  
 7.244  
 7.238  
 7.237  
 7.230  
 7.222  
 7.218  
 7.216  
 7.197  
 7.186  
 7.178  
 7.172  
 7.172  
 7.166  
 7.157  
 7.155  
 7.150  
 7.148  
 7.142  
 4.515  
 4.501  
 3.829  
 3.815  
 3.812  
 3.804  
 3.801  
 3.798  
 3.790  
 3.787  
 3.773  
 3.190  
 3.076  
 3.063  
 3.042  
 3.029  
 2.966  
 2.949  
 2.932  
 2.915  
 2.820  
 2.809  
 2.277

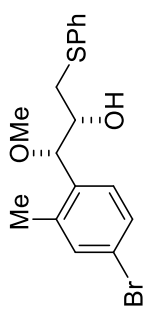

Scheme 6, sulfide **10**

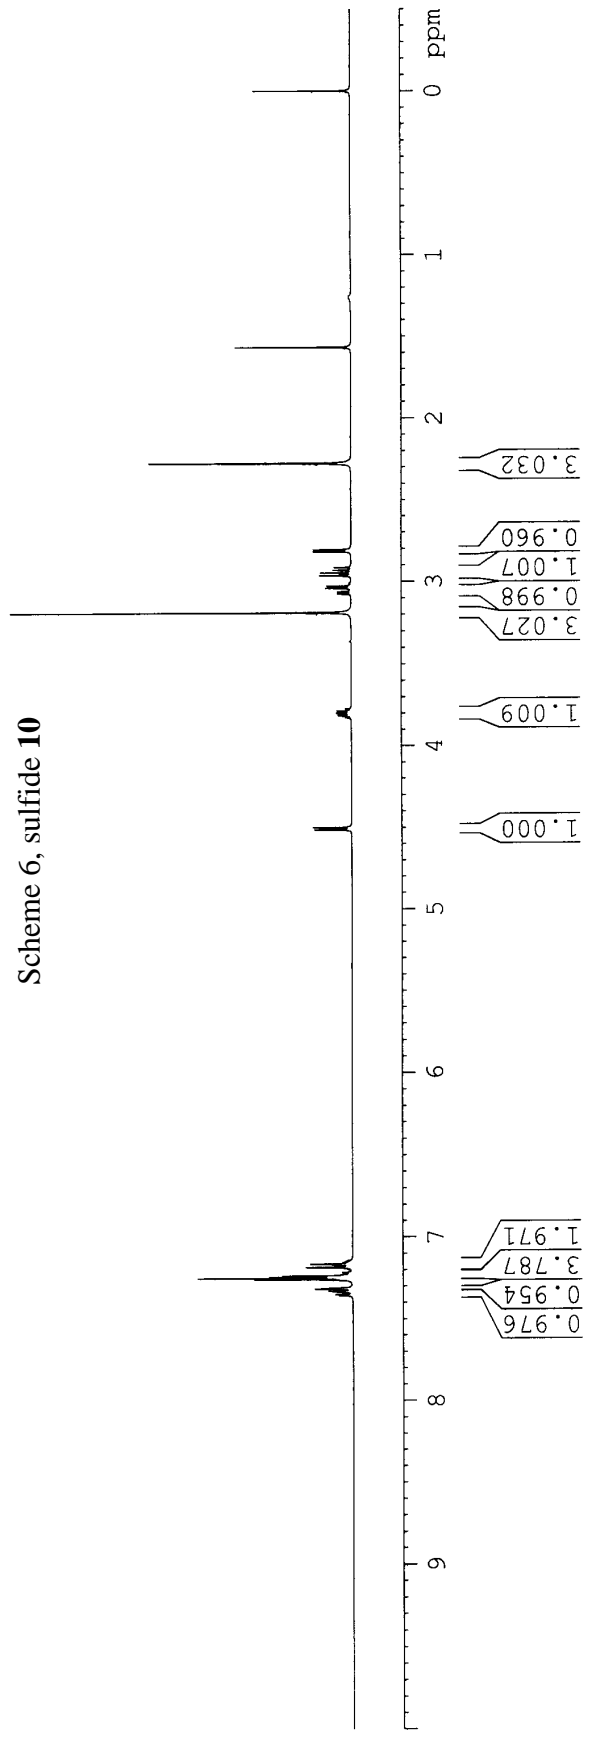



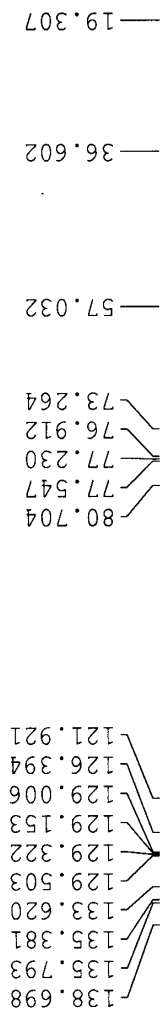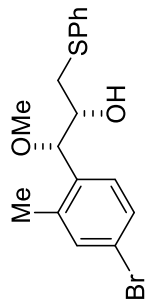

Scheme 6, sulfide **10**

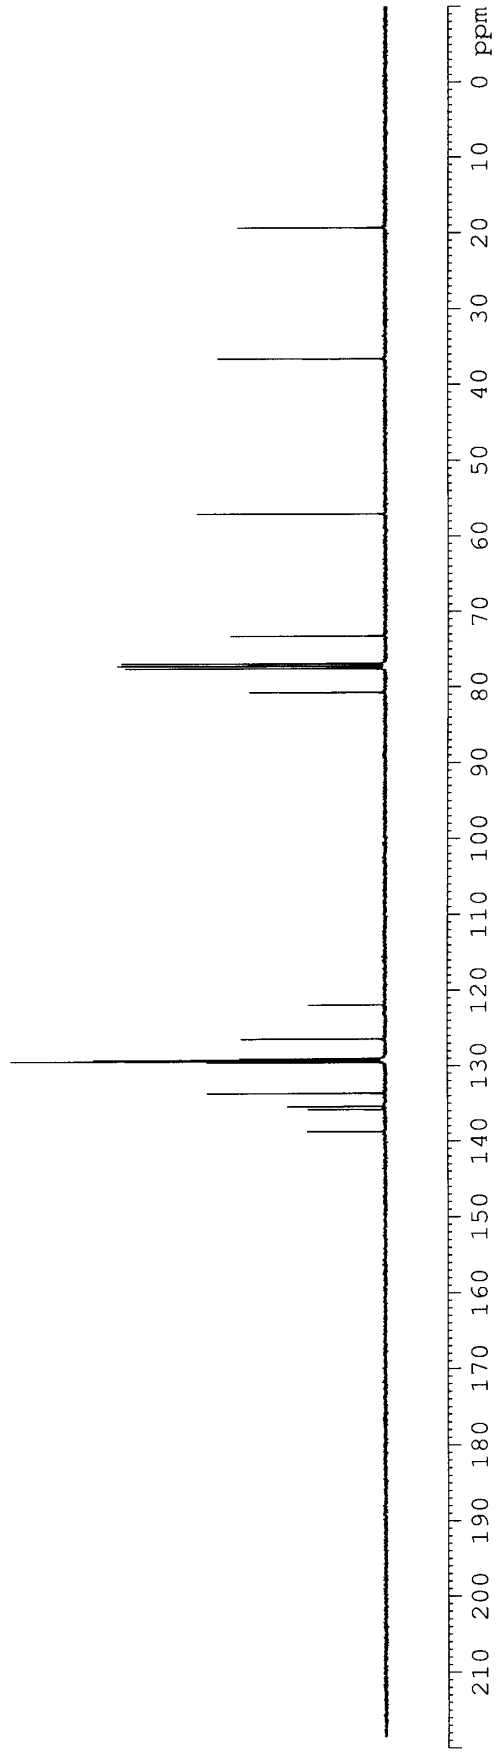

2.357  
 2.961  
 2.974  
 2.994  
 3.006  
 3.040  
 3.046  
 3.222  
 3.298  
 3.307  
 3.330  
 3.340  
 3.836  
 3.843  
 3.845  
 3.848  
 3.854  
 3.857  
 3.861  
 3.864  
 3.870  
 3.873  
 3.876  
 3.883  
 4.426  
 4.445

7.161  
 7.181  
 7.260  
 7.341  
 7.365  
 7.370

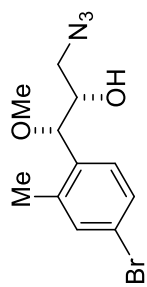

Scheme 7, azide **11**

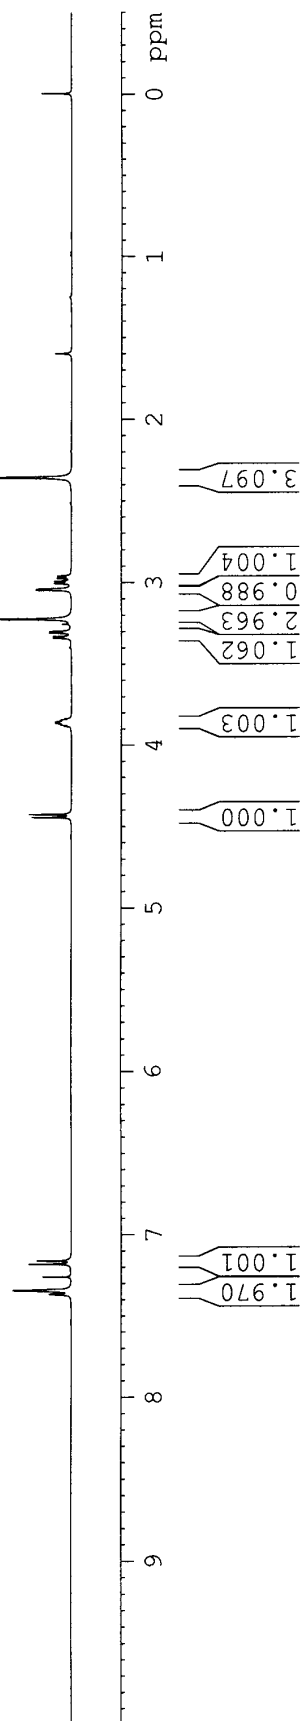

139.215  
134.816  
133.765  
129.791  
129.082  
122.318

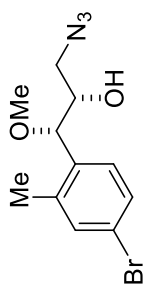

Scheme 7, azide **11**

80.393  
77.546  
77.229  
76.911  
74.638  
56.889  
52.125  
19.344

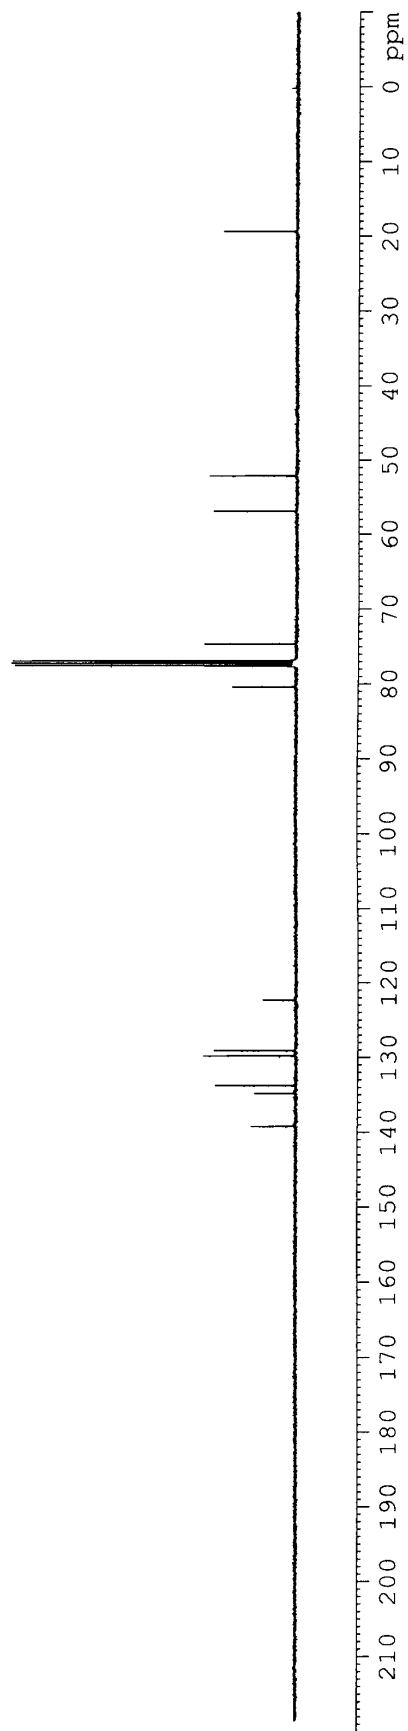

4.570  
4.556  
3.926  
3.914  
3.901  
3.887  
3.875  
3.619  
3.606  
3.591  
3.578  
3.382  
3.369  
3.353  
3.341  
3.251  
2.958  
2.947  
2.367

7.378  
7.373  
7.352  
7.350  
7.260  
7.218  
7.198

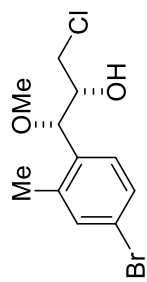

Scheme 7, chloride 12

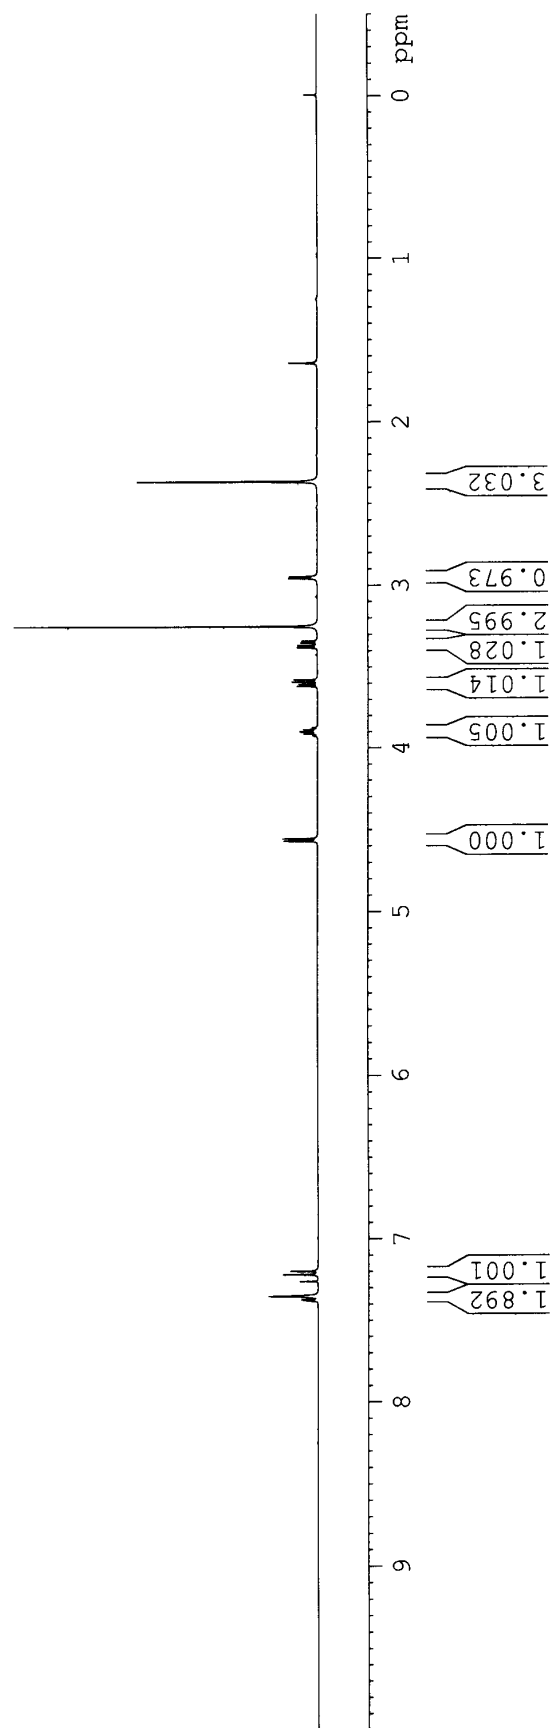

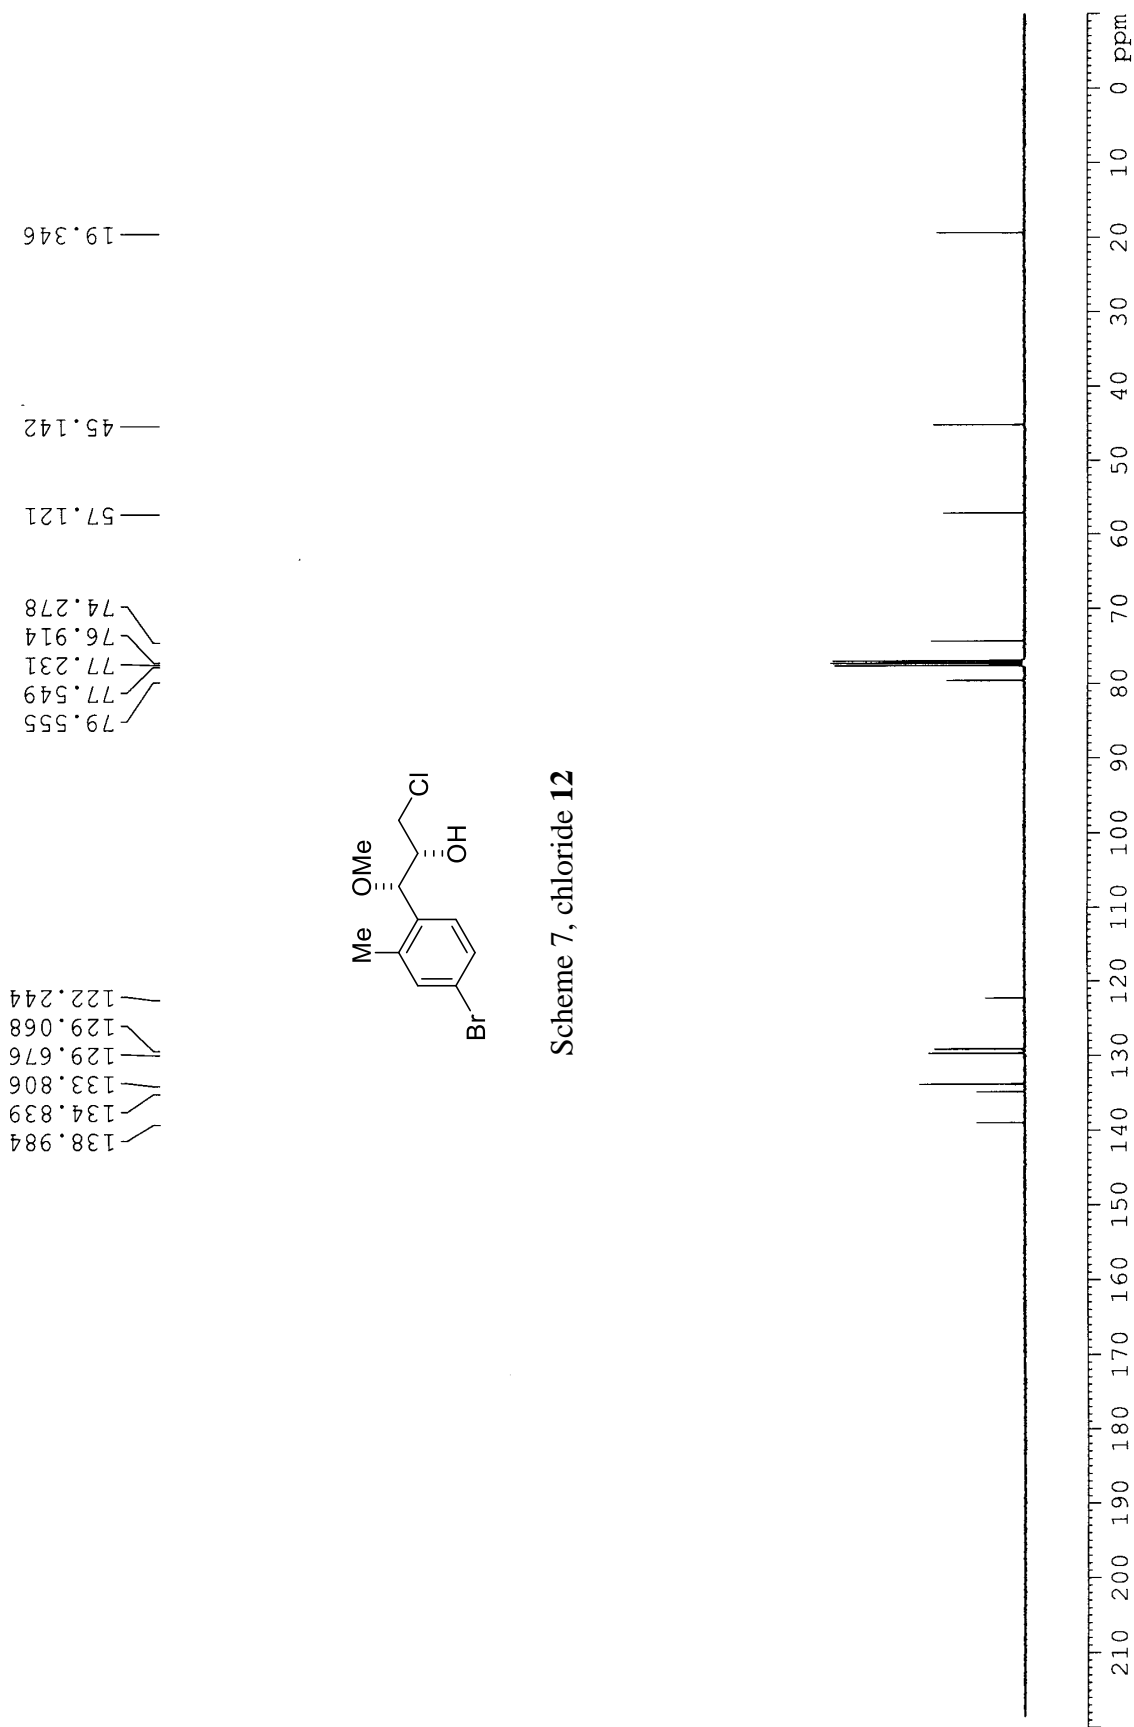

Supplement: d1ra02297k1.pdf [file d1ra02297k1.pdf]
